# Supplementary material for: Stannylenes and Germylenes Stabilized by Tetradentate Bis(amidine) Ligands with a Rigid Naphthalene Backbone
Source: MDPI journal article supplement (doi:10.3390/molecules29020325), 2024-01-09
Supplement: s1 [file s1]

# Supporting Information

## Table of contents

|                                                                                                                        |    |
|------------------------------------------------------------------------------------------------------------------------|----|
| <b>General information</b> .....                                                                                       | 3  |
| $^1\text{H}$ NMR spectrum of compound $\text{L}_3\text{H}_2$ ( $\text{DMSO-d}_6$ , 500 MHz) .....                      | 5  |
| $^{13}\text{C}\{^1\text{H}\}$ NMR spectrum of compound $\text{L}_3\text{H}_2$ ( $\text{DMSO-d}_6$ , 125 MHz) .....     | 6  |
| $^1\text{H}$ NMR spectrum of compound $\text{L}_1\text{Sn}$ ( $\text{THF-d}_8$ , 500 MHz) .....                        | 7  |
| $^{13}\text{C}\{^1\text{H}\}$ NMR spectrum of compound $\text{L}_1\text{Sn}$ ( $\text{THF-d}_8$ , 125 MHz) .....       | 8  |
| $^{119}\text{Sn}\{^1\text{H}\}$ NMR spectrum of compound $\text{L}_1\text{Sn}$ ( $\text{THF-d}_8$ , 186 MHz) .....     | 9  |
| $^1\text{H}$ NMR spectrum of compound $\text{L}_3\text{Sn}$ ( $\text{THF-d}_8$ , 400 MHz) .....                        | 10 |
| $^{13}\text{C}\{^1\text{H}\}$ NMR spectrum of compound $\text{L}_3\text{Sn}$ ( $\text{THF-d}_8$ , 125 MHz) .....       | 11 |
| $^{119}\text{Sn}\{^1\text{H}\}$ NMR spectrum of compound $\text{L}_3\text{Sn}$ ( $\text{THF-d}_8$ , 186 MHz) .....     | 12 |
| $^1\text{H}$ NMR spectrum of compound $\text{L}_2\text{Ge}$ ( $\text{C}_6\text{D}_6$ , 300 MHz) .....                  | 13 |
| $^{13}\text{C}\{^1\text{H}\}$ NMR spectrum of compound $\text{L}_2\text{Ge}$ ( $\text{C}_6\text{D}_6$ , 125 MHz) ..... | 14 |
| $^1\text{H}$ NMR spectrum of compound 1a ( $\text{THF-d}_8$ , 500 MHz) .....                                           | 15 |
| $^{13}\text{C}\{^1\text{H}\}$ NMR spectrum of compound 1a ( $\text{THF-d}_8$ , 125 MHz) .....                          | 16 |
| $^{119}\text{Sn}\{^1\text{H}\}$ NMR spectrum of compound 1a ( $\text{THF-d}_8$ , 186 MHz) .....                        | 17 |
| $^1\text{H}$ NMR spectrum of compound 1b ( $\text{THF-d}_8$ , 300 MHz) .....                                           | 18 |
| $^{13}\text{C}\{^1\text{H}\}$ NMR spectrum of compound 1b ( $\text{THF-d}_8$ , 125 MHz) .....                          | 19 |
| $^{119}\text{Sn}\{^1\text{H}\}$ NMR spectrum of compound 1b ( $\text{THF-d}_8$ , 186 MHz) .....                        | 20 |
| $^1\text{H}$ NMR spectrum of compound 2a ( $\text{THF-d}_8$ , 500 MHz) .....                                           | 21 |
| $^{13}\text{C}\{^1\text{H}\}$ NMR spectrum of compound 2a ( $\text{THF-d}_8$ , 125 MHz) .....                          | 22 |
| $^{119}\text{Sn}\{^1\text{H}\}$ NMR spectrum of compound 2a ( $\text{THF-d}_8$ , 186 MHz) .....                        | 23 |
| $^1\text{H}$ NMR spectrum of compound 2b ( $\text{THF-d}_8$ , 500 MHz) .....                                           | 24 |
| $^{13}\text{C}\{^1\text{H}\}$ NMR spectrum of compound 2b ( $\text{THF-d}_8$ , 125 MHz) .....                          | 25 |
| $^{119}\text{Sn}\{^1\text{H}\}$ NMR spectrum of compound 2a ( $\text{THF-d}_8$ , 186 MHz) .....                        | 26 |
| $^1\text{H}$ NMR spectrum of compound 3a ( $\text{THF-d}_8$ , 500 MHz) .....                                           | 27 |
| $^{13}\text{C}\{^1\text{H}\}$ NMR spectrum of compound 3a ( $\text{THF-d}_8$ , 125 MHz) .....                          | 28 |
| $^{27}\text{Al}\{^1\text{H}\}$ NMR spectrum of compound 3a ( $\text{THF-d}_8$ , 130 MHz) .....                         | 29 |
| $^1\text{H}$ NMR spectrum of compound 3b ( $\text{THF-d}_8$ , 500 MHz) .....                                           | 30 |
| $^{13}\text{C}\{^1\text{H}\}$ NMR spectrum of compound 3b ( $\text{THF-d}_8$ , 125 MHz) .....                          | 31 |
| Crystal data and structure refinement of compound $\text{L}_3\text{H}_2$ .....                                         | 32 |

|                                                                     |     |
|---------------------------------------------------------------------|-----|
| Crystal data and structure refinement of compound $L_1Sn$ .....     | 41  |
| Crystal data and structure refinement of compound $(L_2Sn)_2$ ..... | 49  |
| Crystal data and structure refinement of compound $(L_1Ge)_2$ ..... | 64  |
| Crystal data and structure refinement of compound $L_2Ge$ .....     | 76  |
| Crystal data and structure refinement of compound 1a.....           | 85  |
| Crystal data and structure refinement of compound 1b .....          | 95  |
| Crystal data and structure refinement of compound 2a.....           | 111 |
| Crystal data and structure refinement of compound 3b .....          | 123 |
| Calculations.....                                                   | 132 |

## General information.

All manipulations were performed under an inert argon or nitrogen atmosphere using standard Schlenk-line and glovebox techniques. Dry, oxygen-free solvents were employed. Reagents were obtained from commercial suppliers unless otherwise stated. *N*-(2,6-dimethylphenyl)acetamide,<sup>1</sup> *N*-(2,6-dimethylphenyl)acetimidoyl chloride,<sup>1</sup> *N,N'*-(naphthalene-1,8-diyl)bis(2,2-dimethylpropanamide),<sup>2</sup> *N,N'*-(naphthalene-1,8-diyl)bis(2,2-dimethylpropanimidoyl chloride),<sup>2</sup> **L**<sub>1</sub><sup>3</sup>, and **L**<sub>2</sub><sup>2</sup> were synthesized following reported procedures. The Lappert germanium(II) and tin (II) derivatives were prepared according to literature procedures.<sup>4</sup> 1D and 2D NMR spectra were recorded with the following spectrometers for <sup>1</sup>H, <sup>13</sup>C and <sup>119</sup>Sn: Bruker Avance II 300MHz, Avance III HD 400 MHz, and Avance I and II 500 MHz spectrometers. The chemical shift has been counted positively verse the low field and expressed in part per million (ppm). The mass spectrometric analysis was done using three techniques, direct chemical ionization (DCI-CH<sub>4</sub>) methods and recorded on a GCT Premier Waters mass spectrometer; electrospray ionization (ESI), recorded on a Waters Xevo G2 Q-TOF mass spectrometer; and a Maldi micro-MX micro-Mass in a pyrene matrix (ratio product/matrix:1/100). Melting points were measured with a capillary Electrothermal Stuart SMP40 apparatus, and samples were prepared in the glovebox before the analysis. FT-IR spectra were measured on a ThermoNicolet 6700, Nexus and recovered in solid state (KBr). Single-crystal X-ray data were collected at low temperature (193(2)K) on a Bruker APEX II Quazar diffractometer equipped with a 30W air-cooled microfocus source [**(L**<sub>2</sub>**Sn**)<sub>2</sub>, **L**<sub>2</sub>**Ge**, **2a** and **3b**] or on a Bruker D8 VENTURE diffractometer equipped with a PHOTON III detector [**L**<sub>3</sub>**H**<sub>2</sub>, **L**<sub>1</sub>**Sn**, (**L**<sub>1</sub>**Ge**)<sub>2</sub>, **1a** and **1b**], using MoK $\alpha$  radiation ( $\lambda$ = 0.71037 Å). The structure were solved by intrinsic phasing method (SHELXT)<sup>5</sup> and refined by full-matrix least-squares method on F<sub>2</sub>.<sup>6</sup> All non-H atoms were refined with anisotropic displacement parameters and all the hydrogen atoms were refined isotropically at calculated positions using a riding model. For **2a**, some solvent molecules were highly disordered and difficult to model correctly. Therefore the SQUEEZE function of PLATON<sup>7</sup> was used to eliminate the contribution of the electron density of those solvent molecules from the intensity data. CCDC-2303009 (**L**<sub>3</sub>**H**<sub>2</sub>), CCDC-2266345 (**L**<sub>1</sub>**Sn**), CCDC-2266346 [**(L**<sub>2</sub>**Sn**)<sub>2</sub>], CCDC-2266347 [**(L**<sub>1</sub>**Ge**)<sub>2</sub>], CCDC-2266348 (**L**<sub>2</sub>**Ge**), CCDC-2266349 (**1a**), CCDC-2266350 (**1b**) CCDC-2266351 (**2a**) and CCDC-2266352 (**3b**) contain the supplementary

crystallographic data for this paper. These data can be obtained free of charge from The Cambridge Crystallographic Data Centre via [www.ccdc.cam.ac.uk/data\\_request/cif](http://www.ccdc.cam.ac.uk/data_request/cif).

- (1) Boéré, R. T.; Klassen, V.; Wolmershäuser, G. Synthesis of Some Very Bulky N,N'-Disubstituted Amidines and Initial Studies of Their Coordination Chemistry†. *J. Chem. Soc. Dalton Trans.* **1998**, No. 24, 4147–4154. <https://doi.org/10.1039/A805548C>.
- (2) Yakovenko, M. V.; Cherkasov, A. V.; Fukin, G. K.; Cui, D.; Trifonov, A. A. Lanthanide Complexes Coordinated by a Dianionic Bis(Amidinate) Ligand with a Rigid Naphthalene Linker. *Eur. J. Inorg. Chem.* **2010**, 2010 (21), 3290–3298. <https://doi.org/10.1002/ejic.201000330>
- (3) Saltarini, S.; Villegas-Escobar, N.; Martínez, J.; Daniliuc, C. G.; Matute, R. A.; Gade, L. H.; Rojas, R. S. Toward a Neutral Single-Component Amidinate Iodide Aluminum Catalyst for the CO<sub>2</sub> Fixation into Cyclic Carbonates. *Inorg. Chem.* **2021**, 60 (2), 1172–1182. <https://doi.org/10.1021/acs.inorgchem.0c03290>
- (4) Davidson, P.; Harris, D.; Lappert, M. Subvalent Group 4B metal alkyls and amides. Part I. The synthesis and physical properties of kinetically stable bis[bis(trimethylsilyl)methyl]-germanium( II), -tin(II), and -lead(II). *J. Chem. Soc., Chem. Dalton Trans.* **1976**, 2268–2274. <https://doi.org/10.1039/DT9760002268>
- (5) Sheldrick, G. M. SHELXT - Integrated space-group and crystal-structure determination, *Acta Crystallogr. Sect. A*, **2015**, 71, 3–8. <https://doi.org/10.1107/S2053273314026370>
- (6) Sheldrick, G. M. Crystal structure refinement with SHELXL. *Acta Crystallogr. Sect. C*, **2015**, 71, 3–8. <https://doi.org/10.1107/S2053229614024218>
- (7) Van der Sluis, P.; Spek, A. L. BYPASS: an effective method for the refinement of crystal structures containing disordered solvent regions. *Acta Cryst., Sect. A*, **1990**, 46, 194–201. <https://doi.org/10.1107/S0108767389011189>

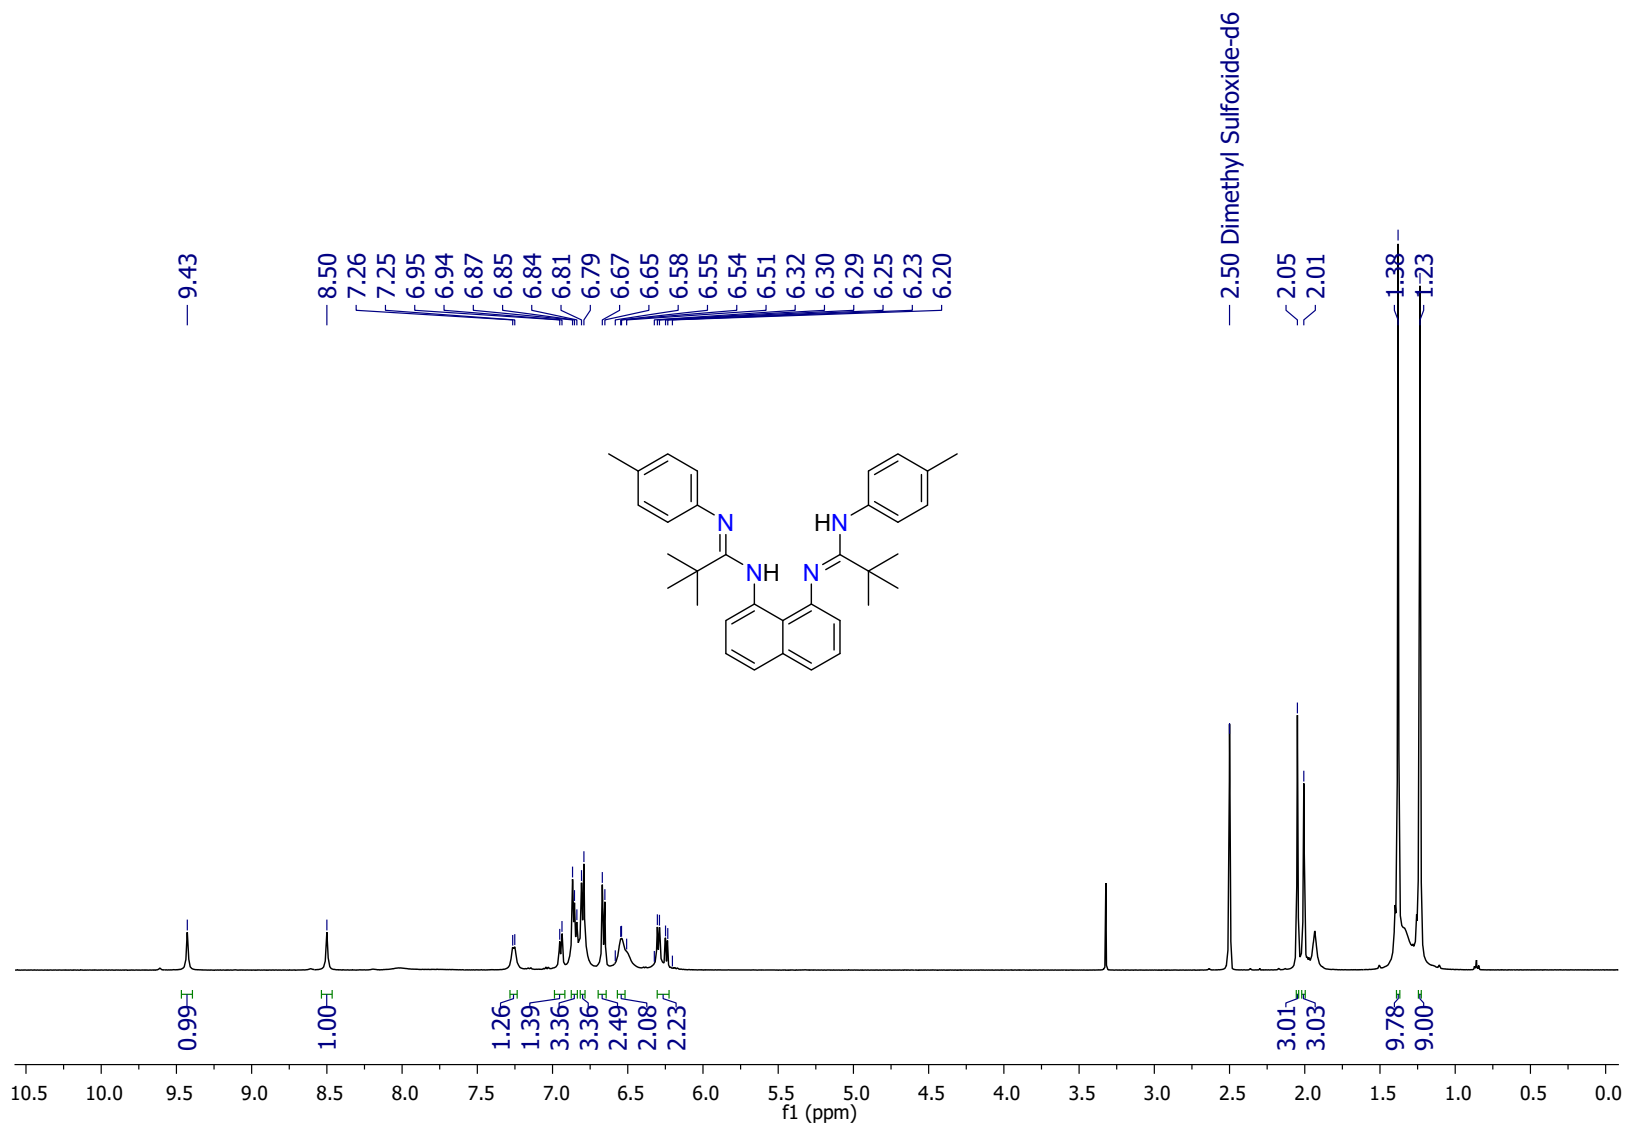

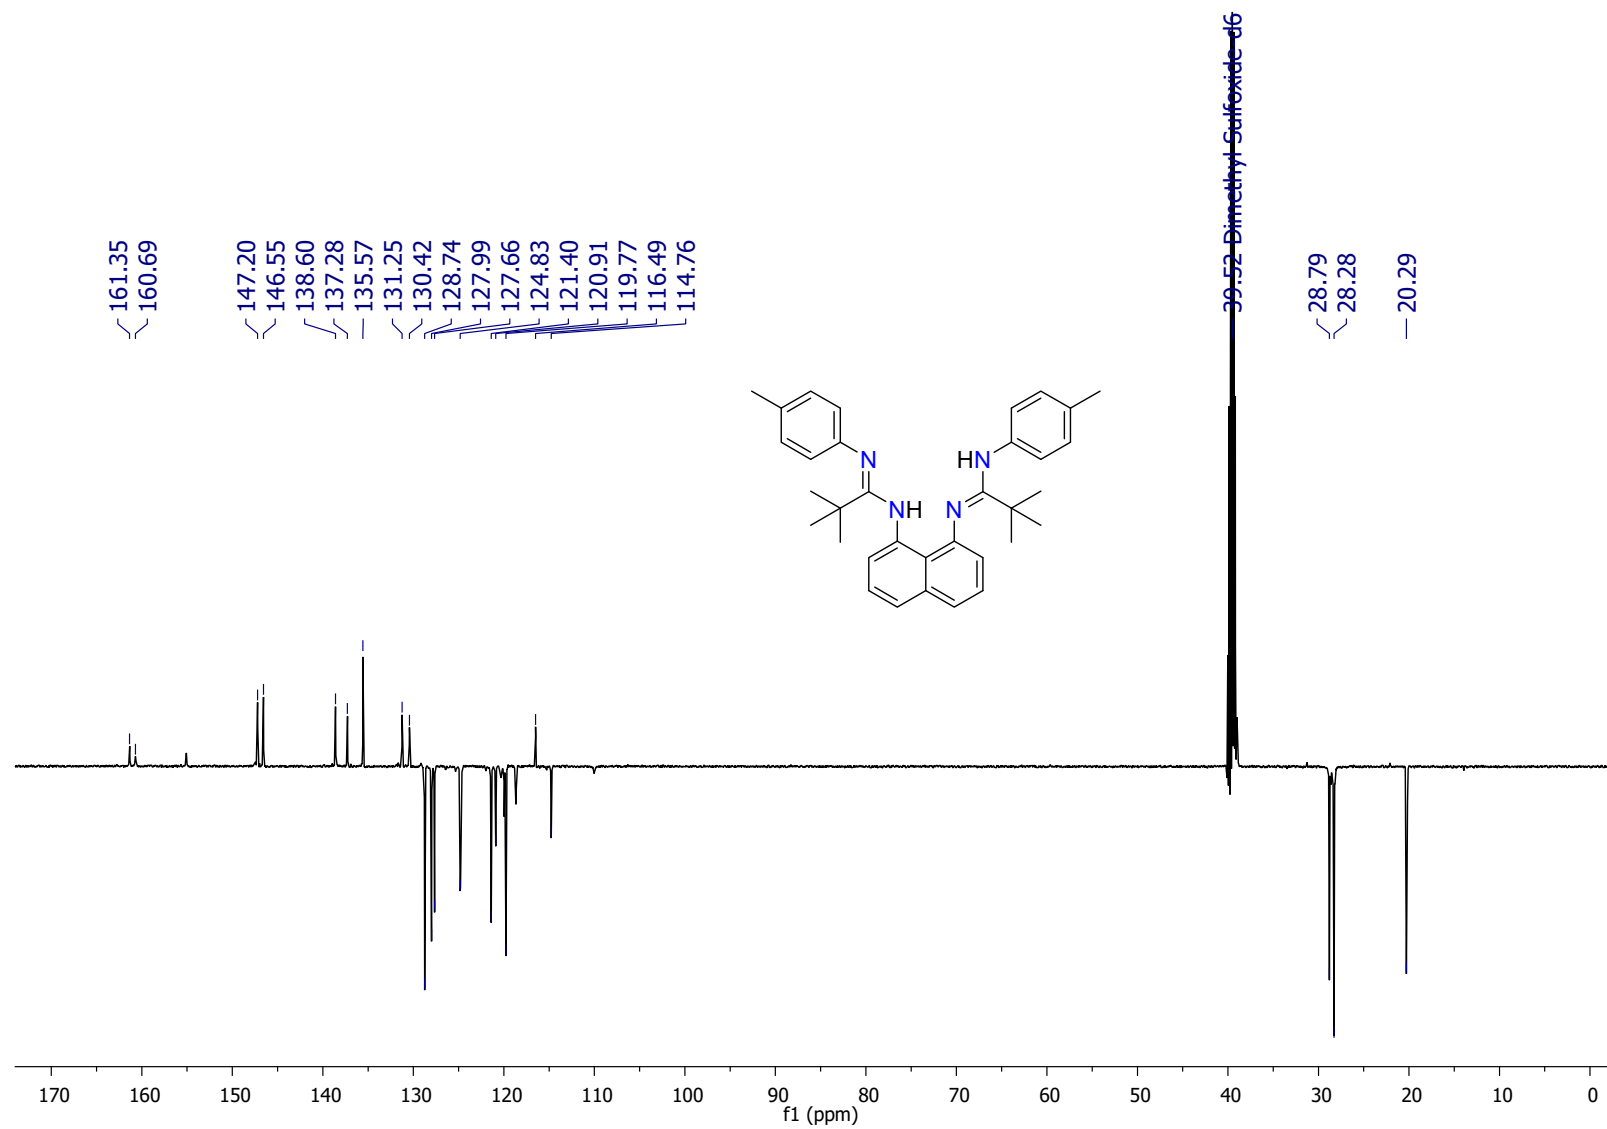

<sup>13</sup>C{<sup>1</sup>H} NMR spectrum of compound **L<sub>3</sub>H<sub>2</sub>** (DMSO-d<sub>6</sub>, 125 MHz)

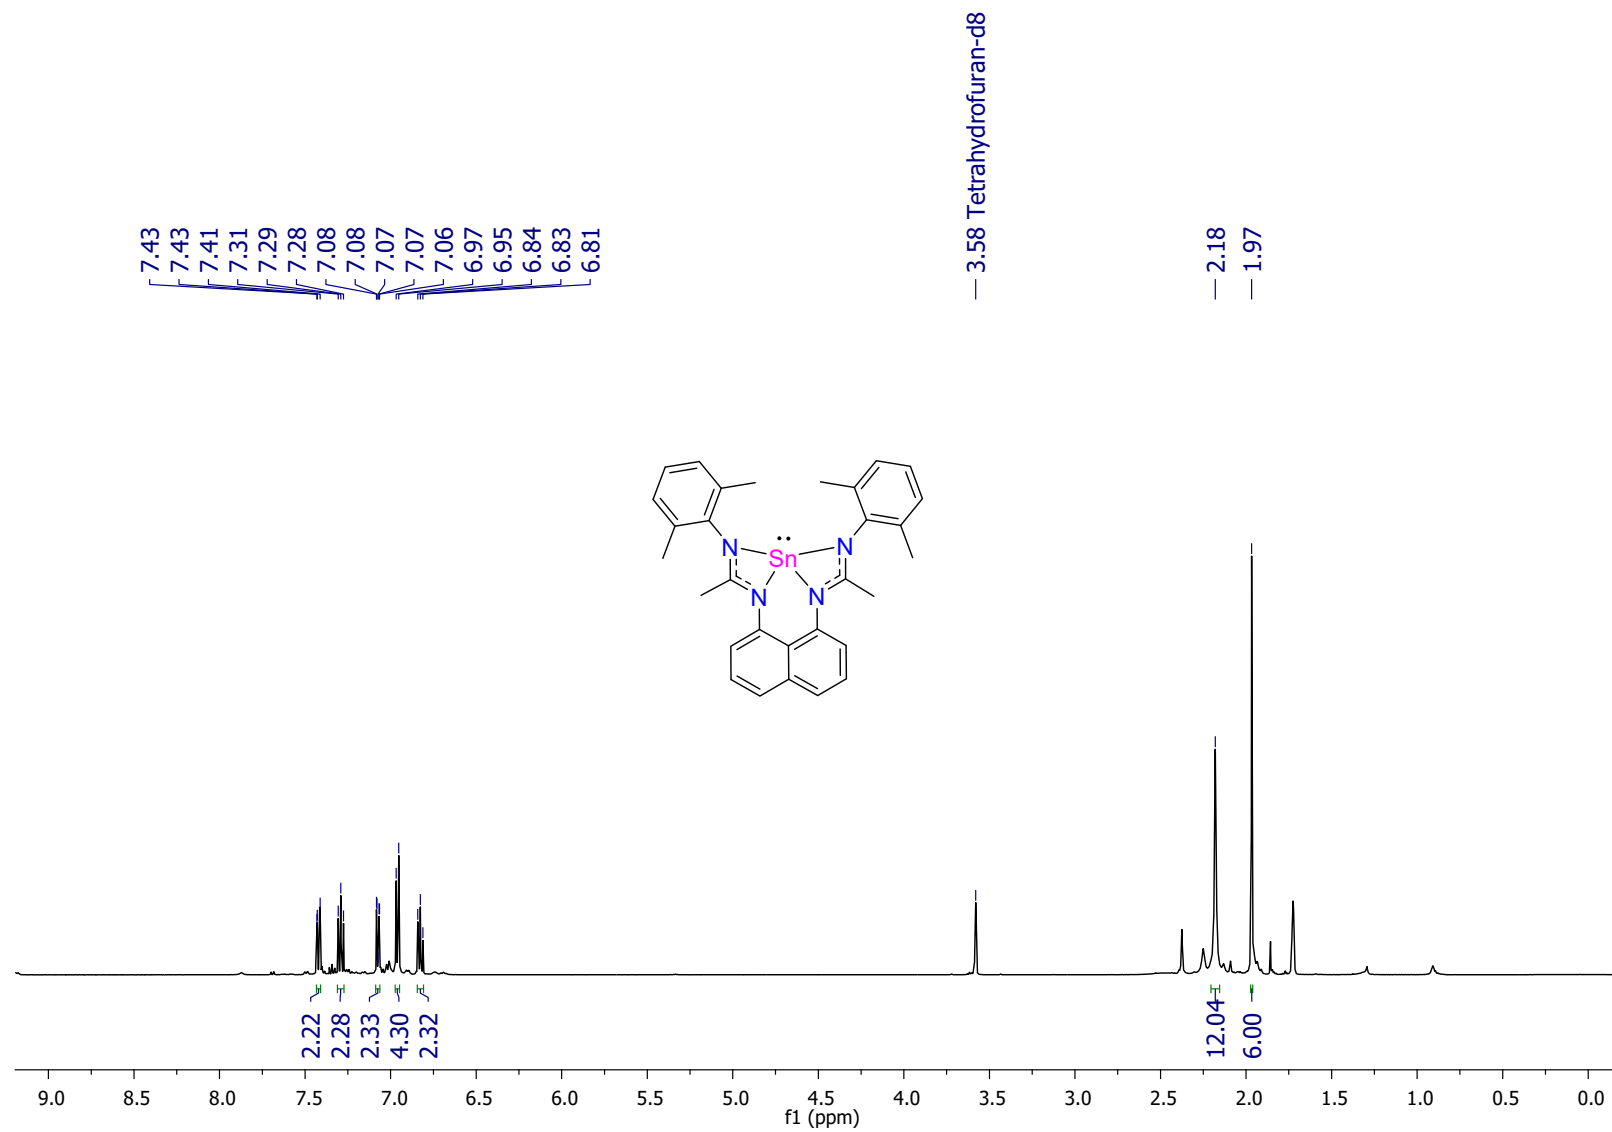

<sup>1</sup>H NMR spectrum of compound **L<sub>1</sub>Sn** (THF-d<sub>8</sub>, 500 MHz)

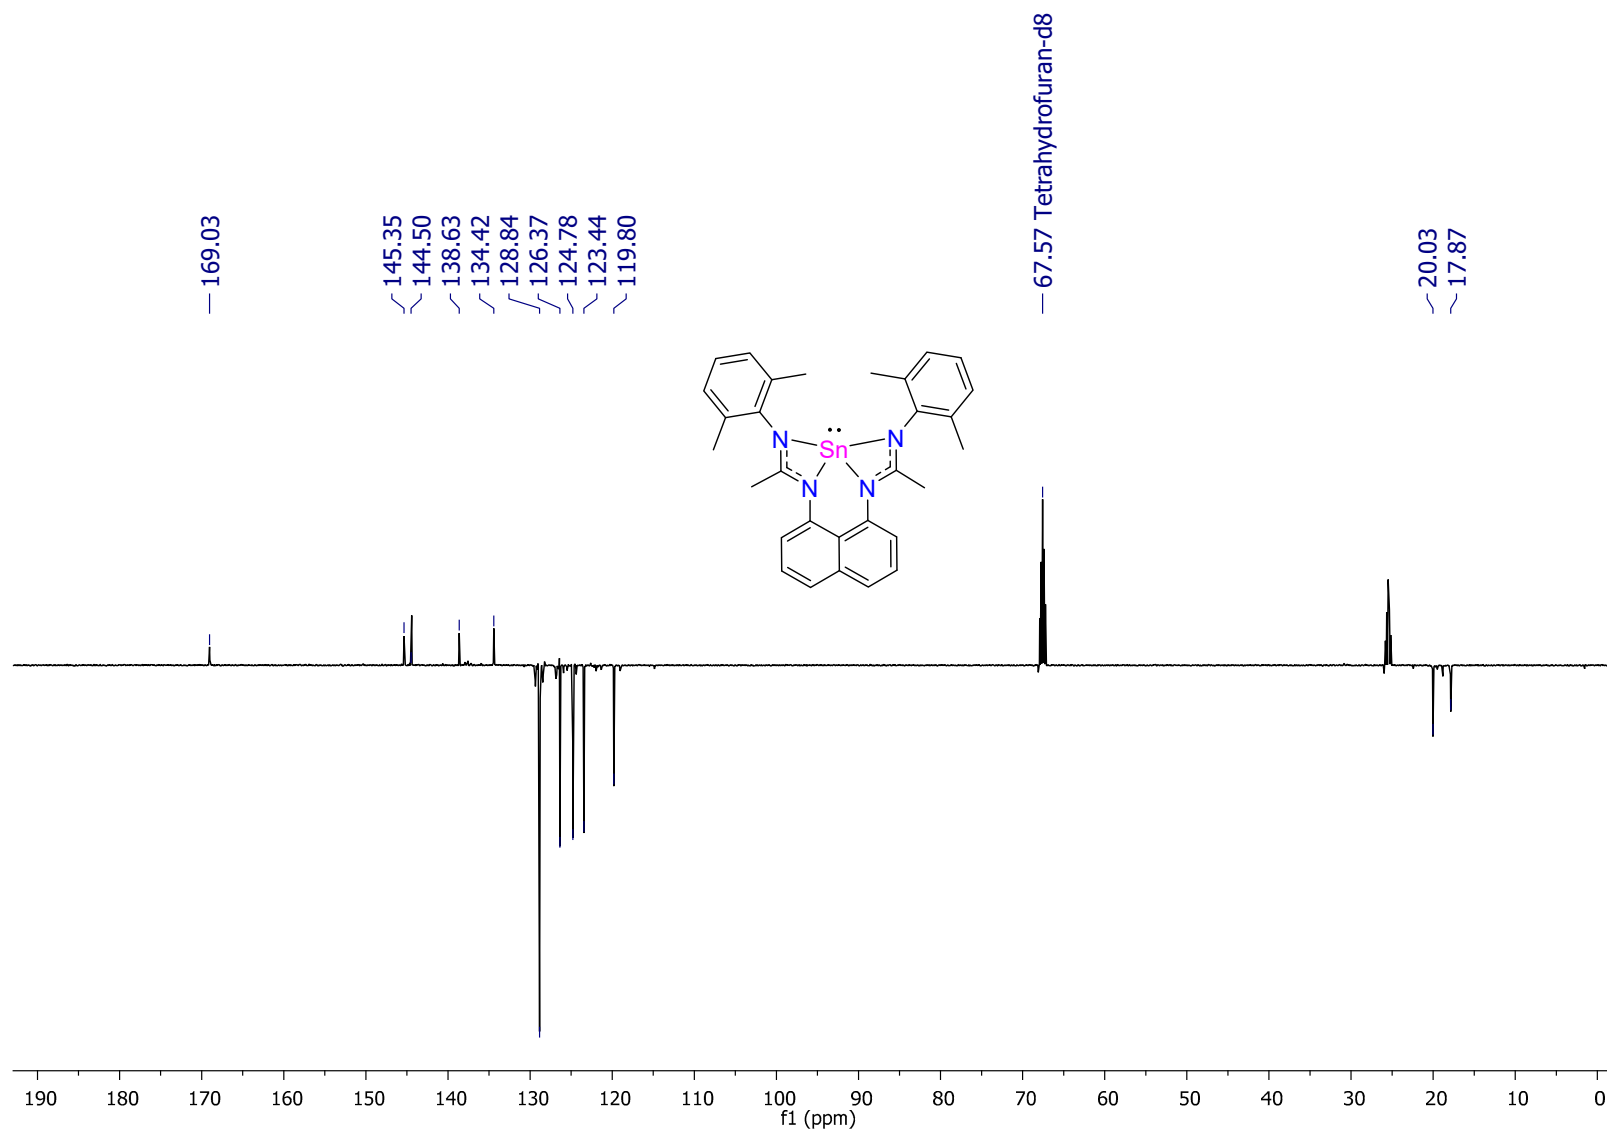

$^{13}C\{^1H\}$  NMR spectrum of compound  $L_1Sn$  (THF- $d_8$ , 125 MHz)



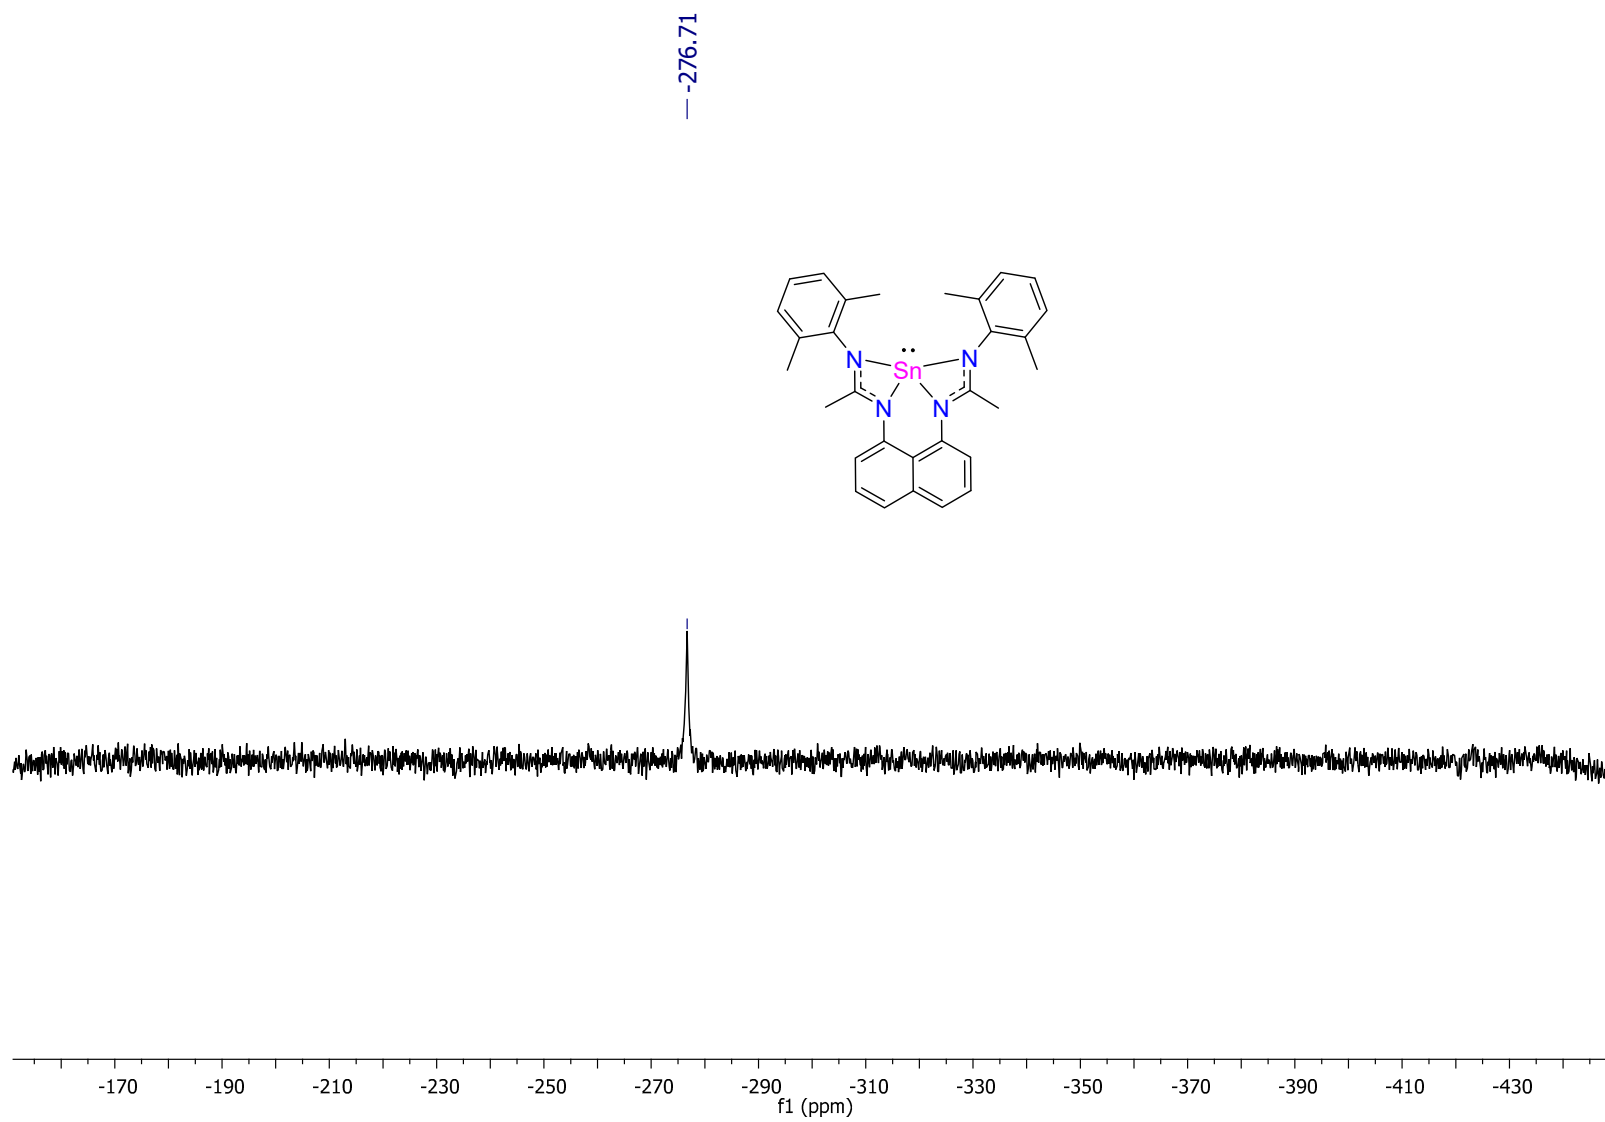

$^{119}\text{Sn}\{^1\text{H}\}$  NMR spectrum of compound **L<sub>1</sub>Sn** ( $\text{THF-d}_8$ , 186 MHz)

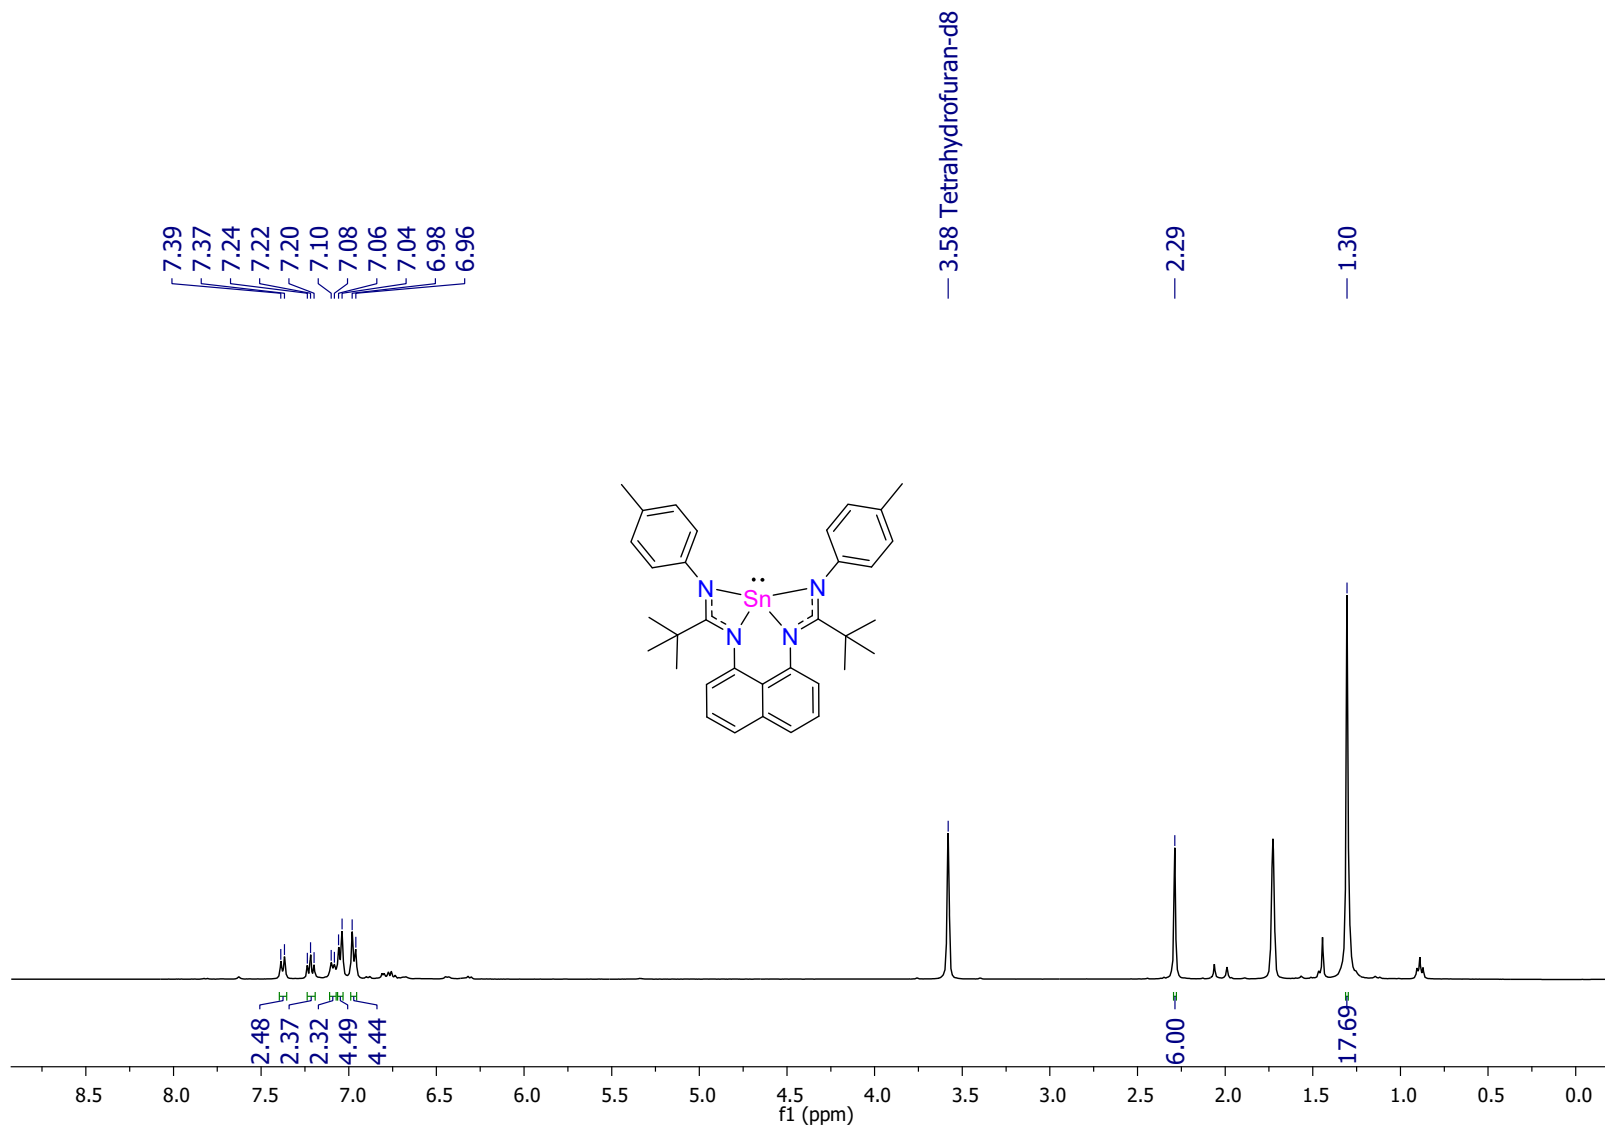

$^1H$  NMR spectrum of compound  $L_3Sn$  (THF- $d_8$ , 400 MHz)

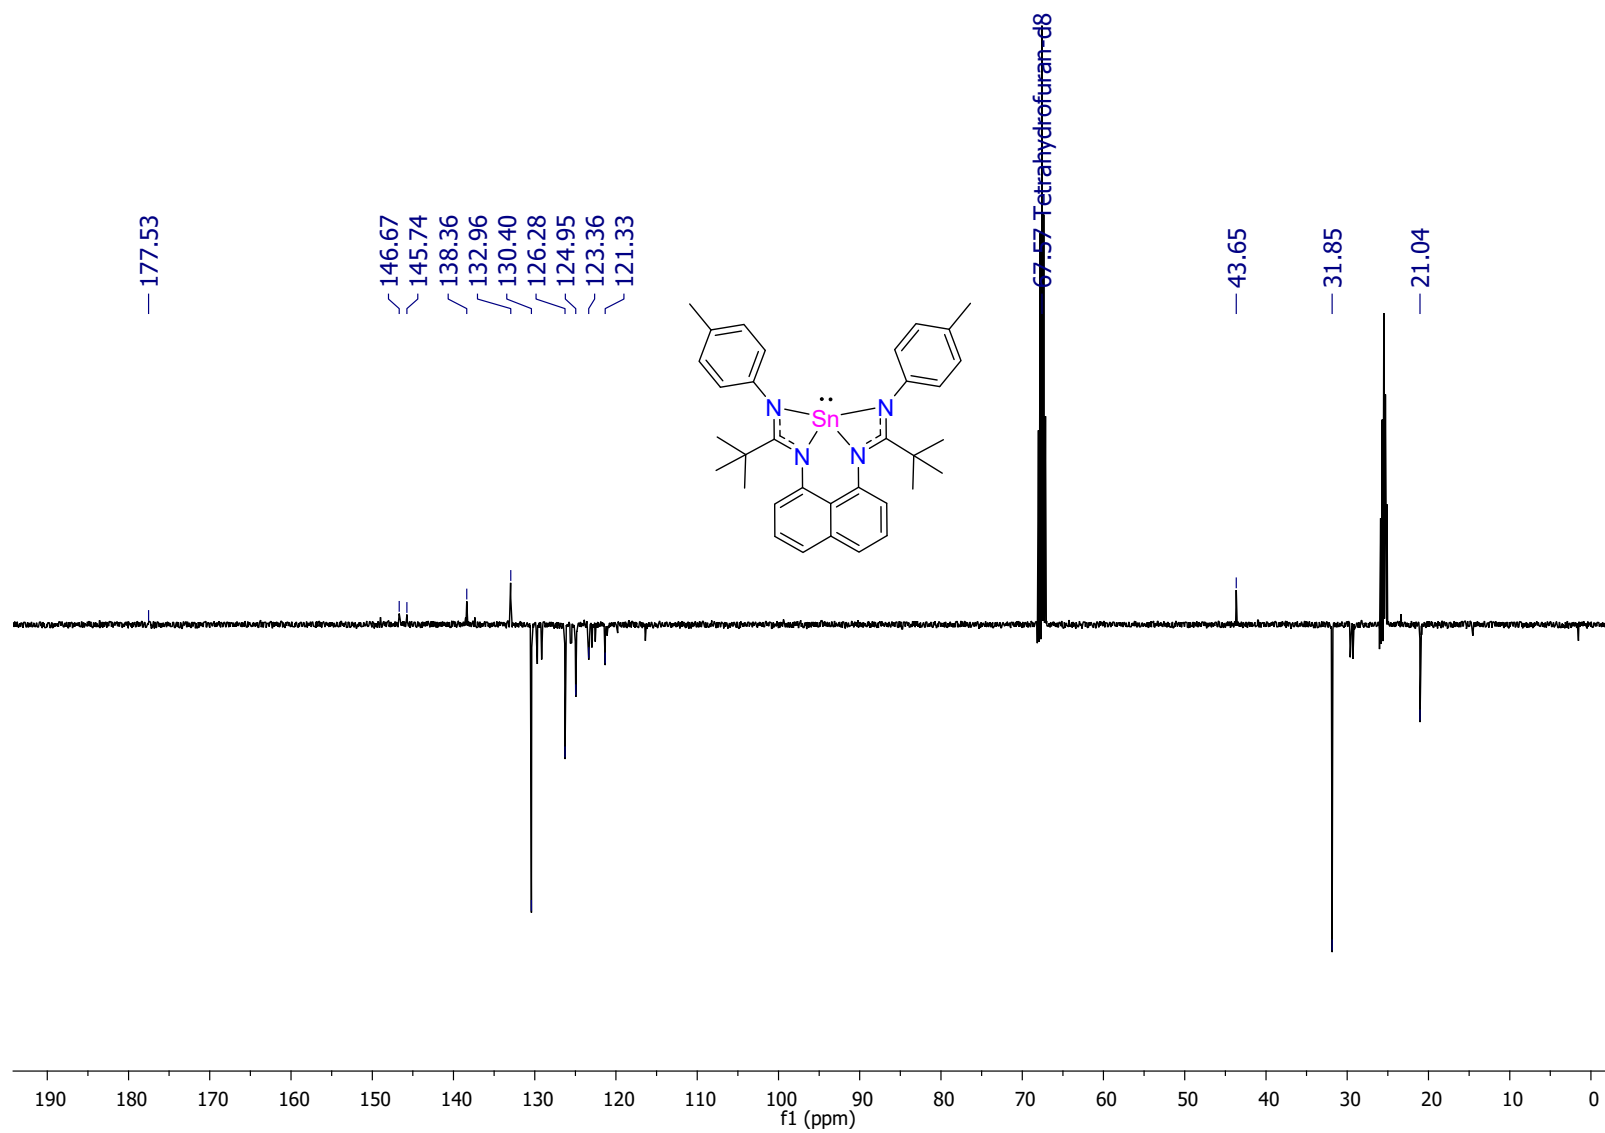

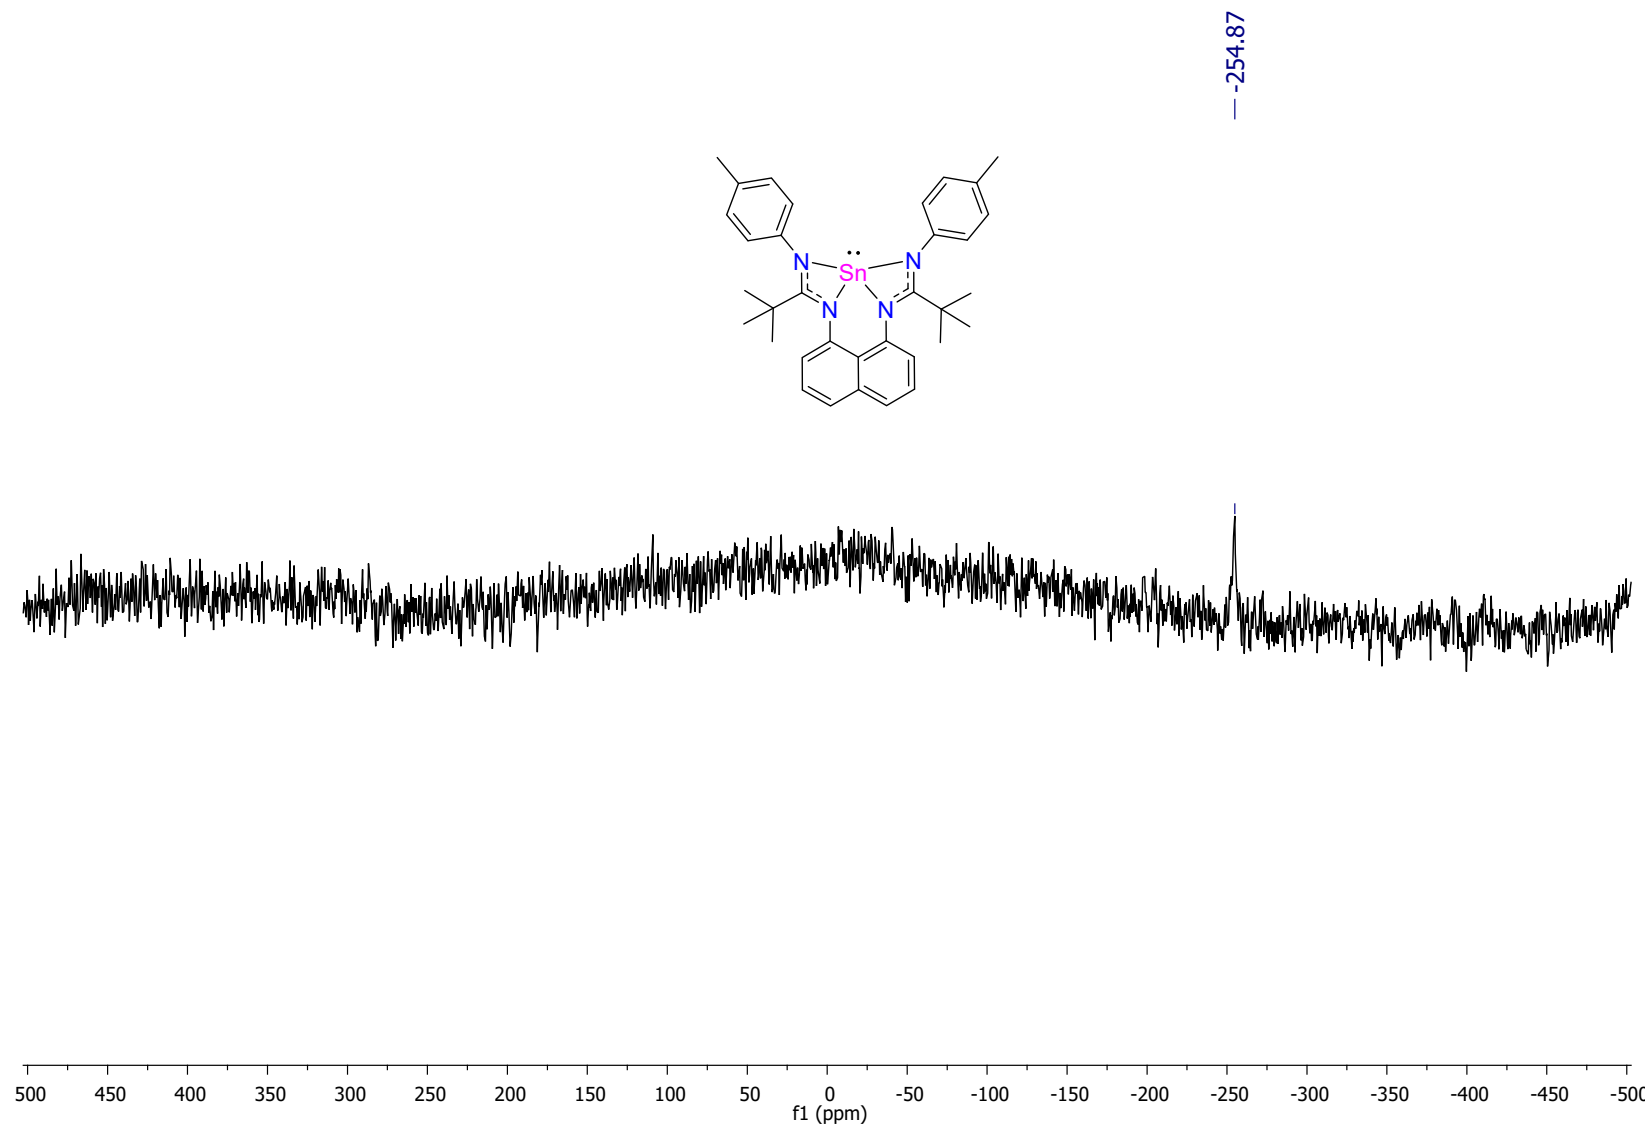

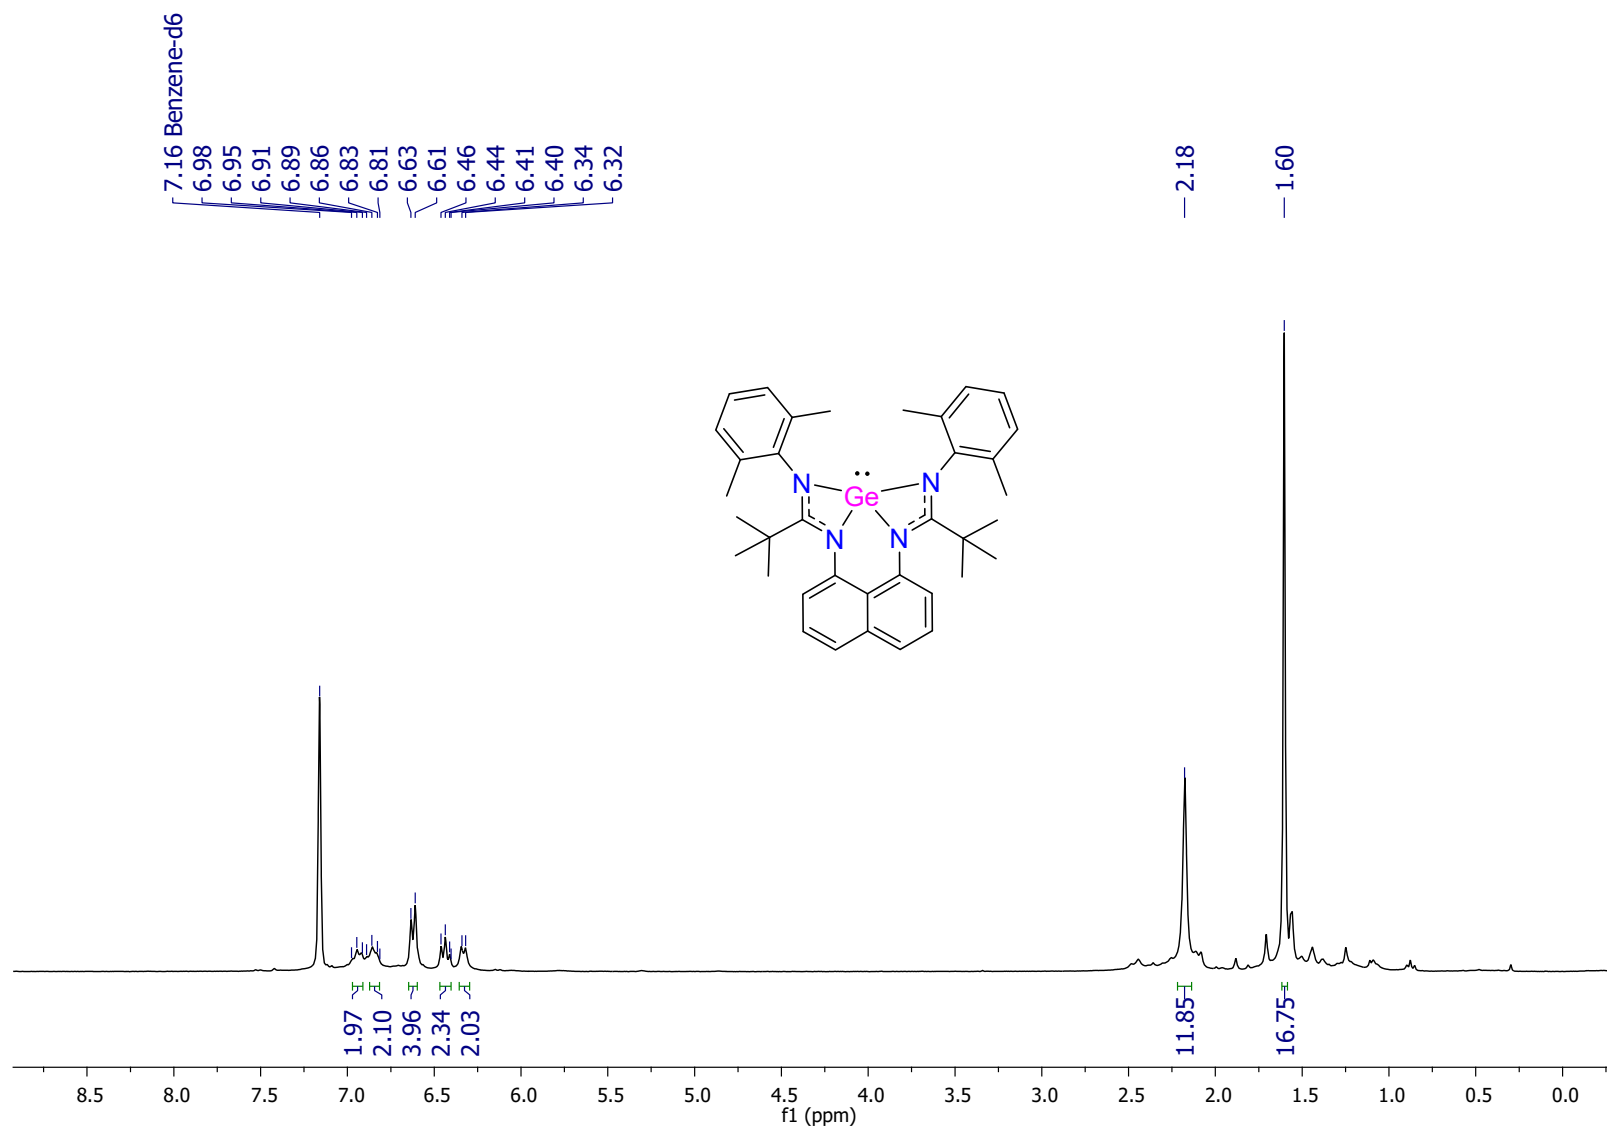

<sup>1</sup>H NMR spectrum of compound **L<sub>2</sub>Ge** (C<sub>6</sub>D<sub>6</sub>, 300 MHz)

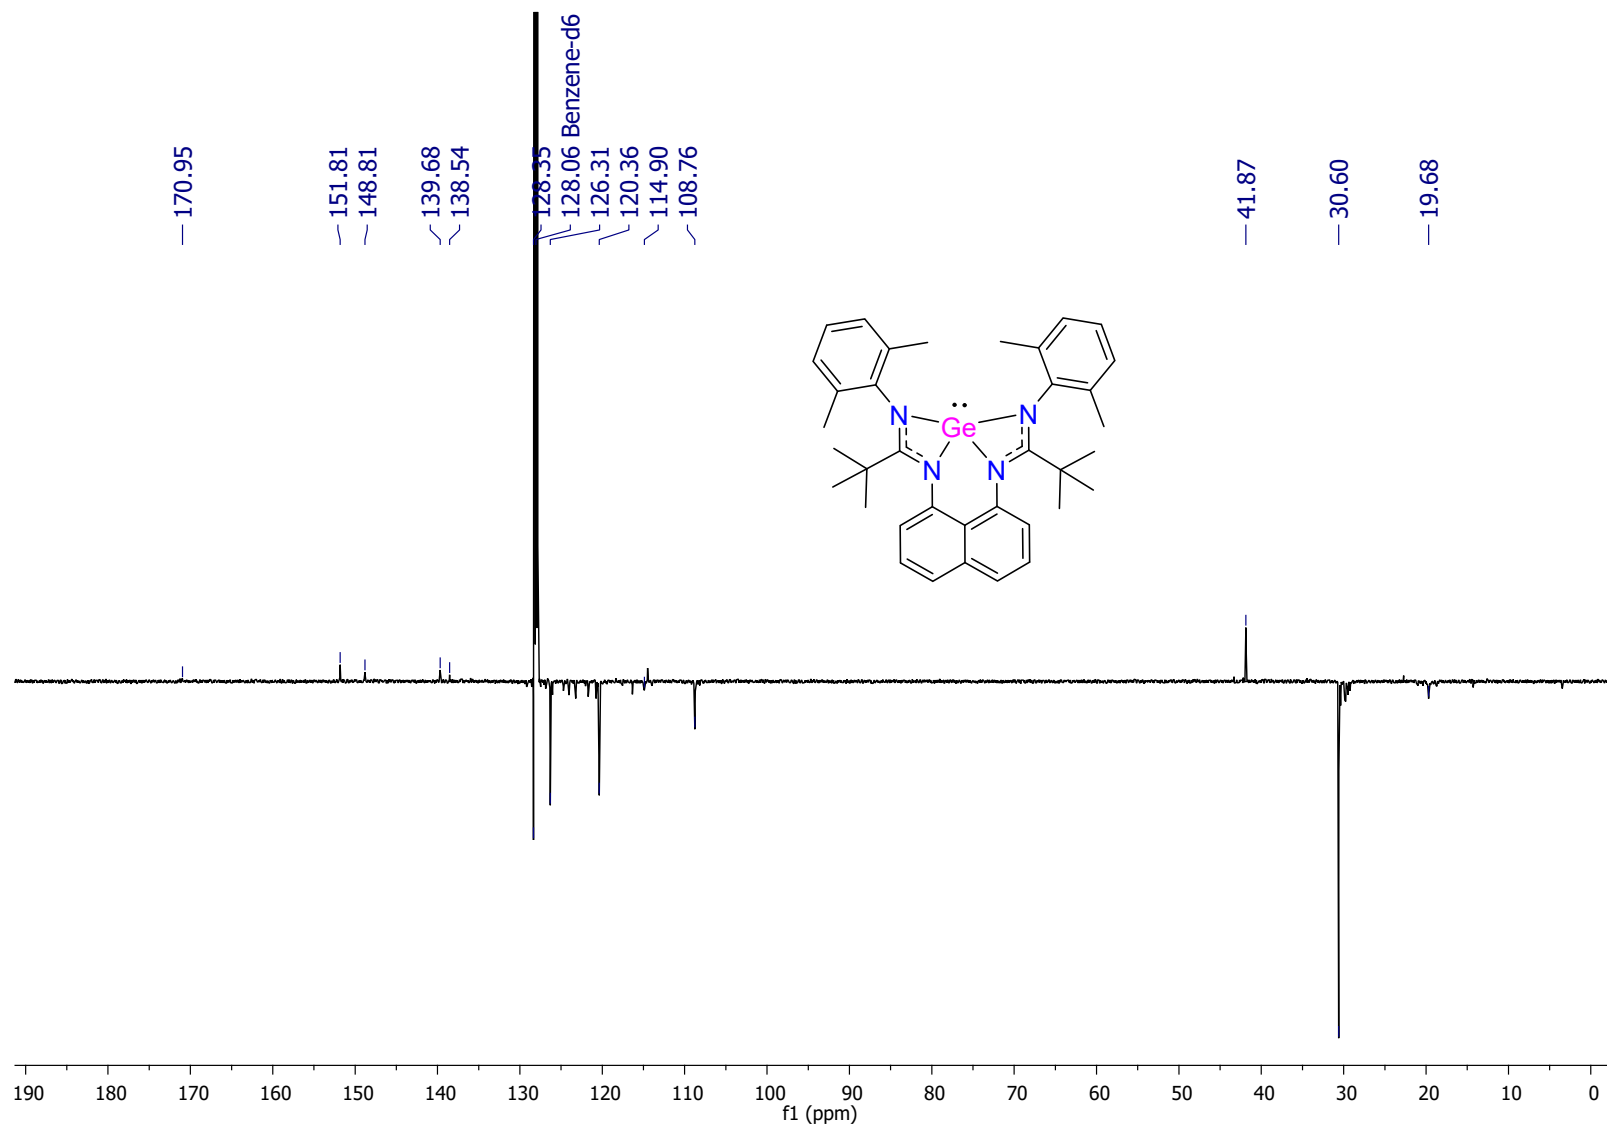

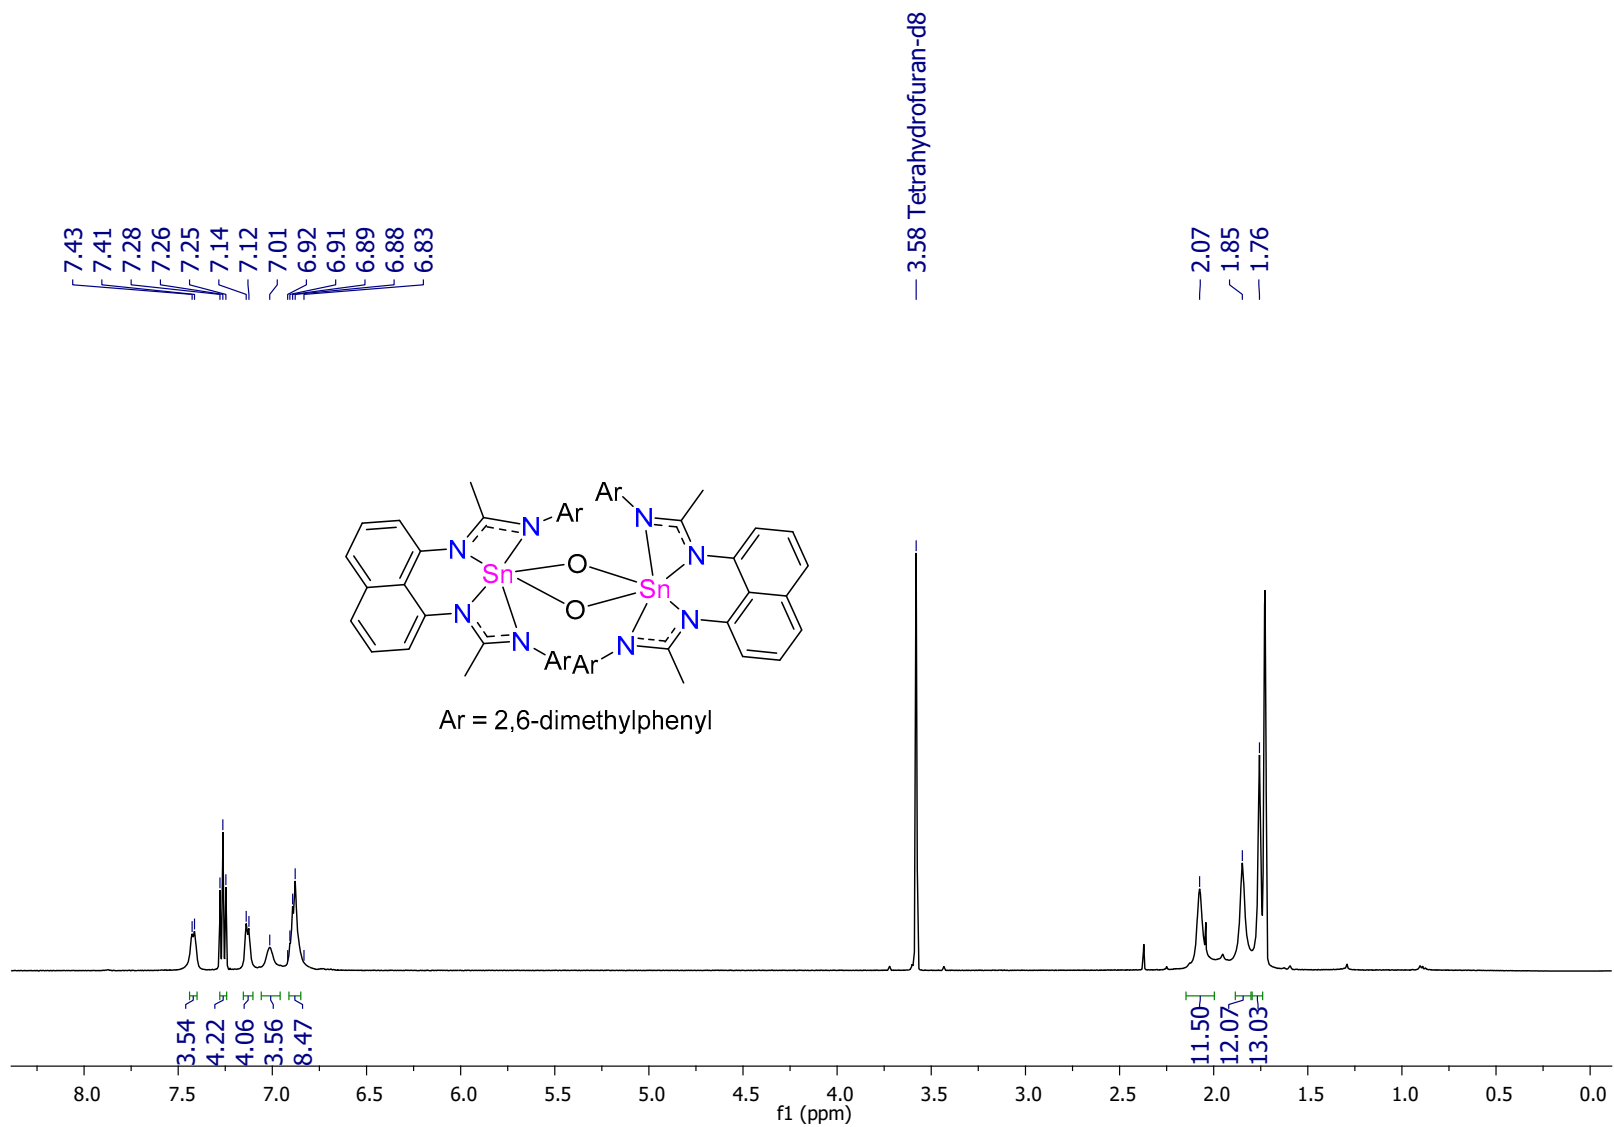

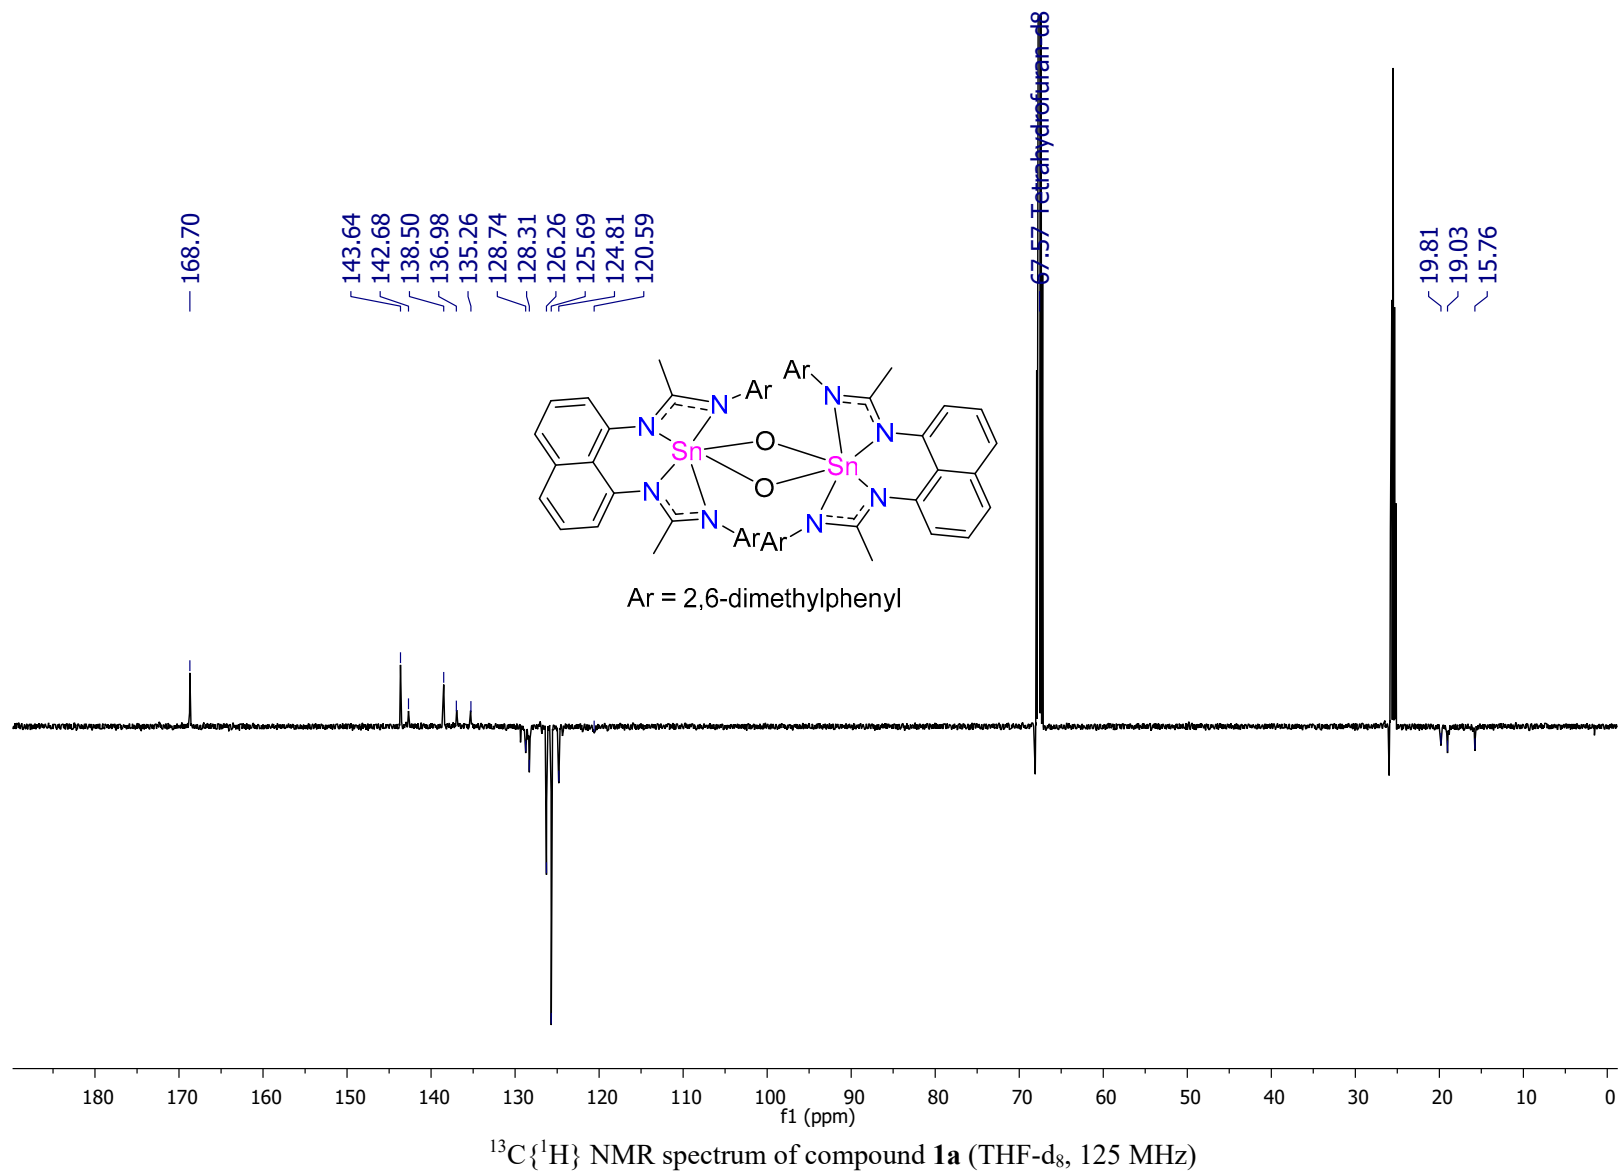



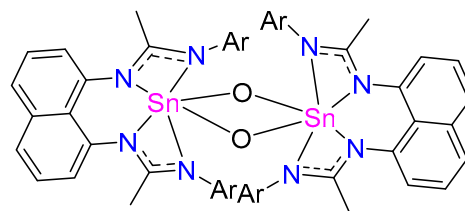

Ar = 2,6-dimethylphenyl

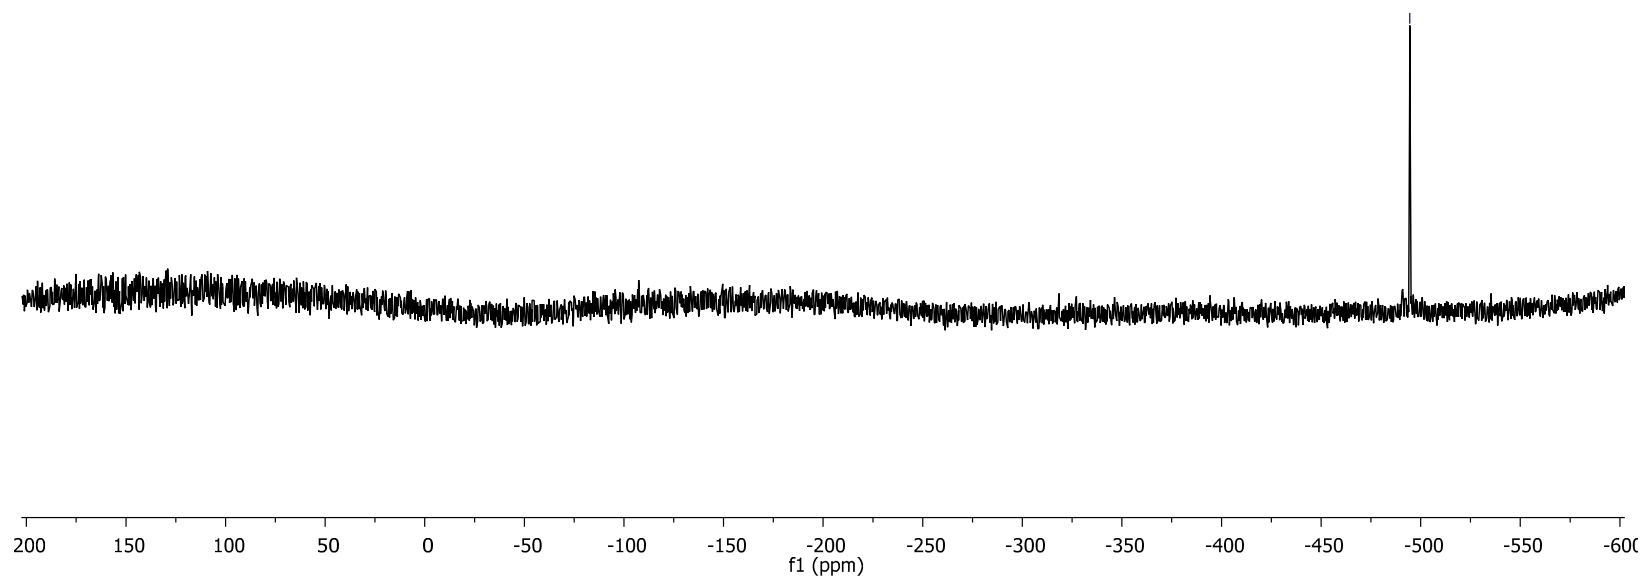

$^{119}\text{Sn}\{^1\text{H}\}$  NMR spectrum of compound **1a** (THF- $\text{d}_8$ , 186 MHz)

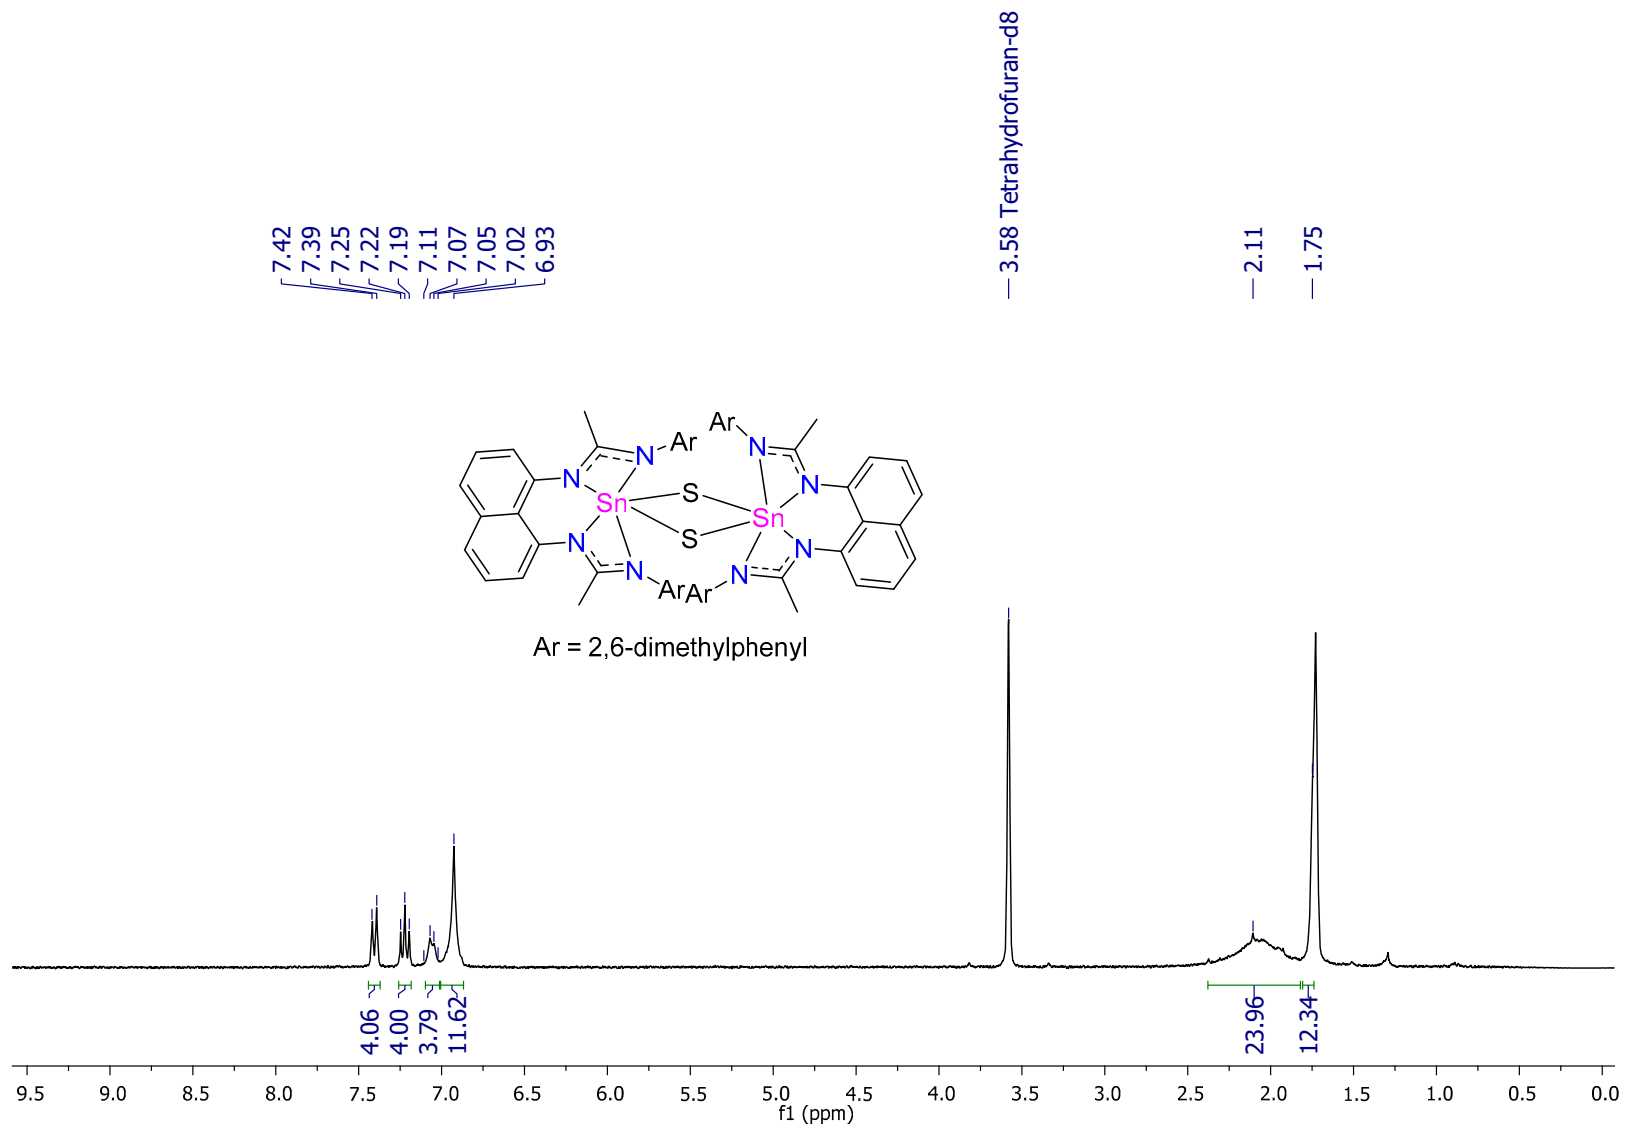

<sup>1</sup>H NMR spectrum of compound **1b** (THF-d<sub>8</sub>, 300 MHz)

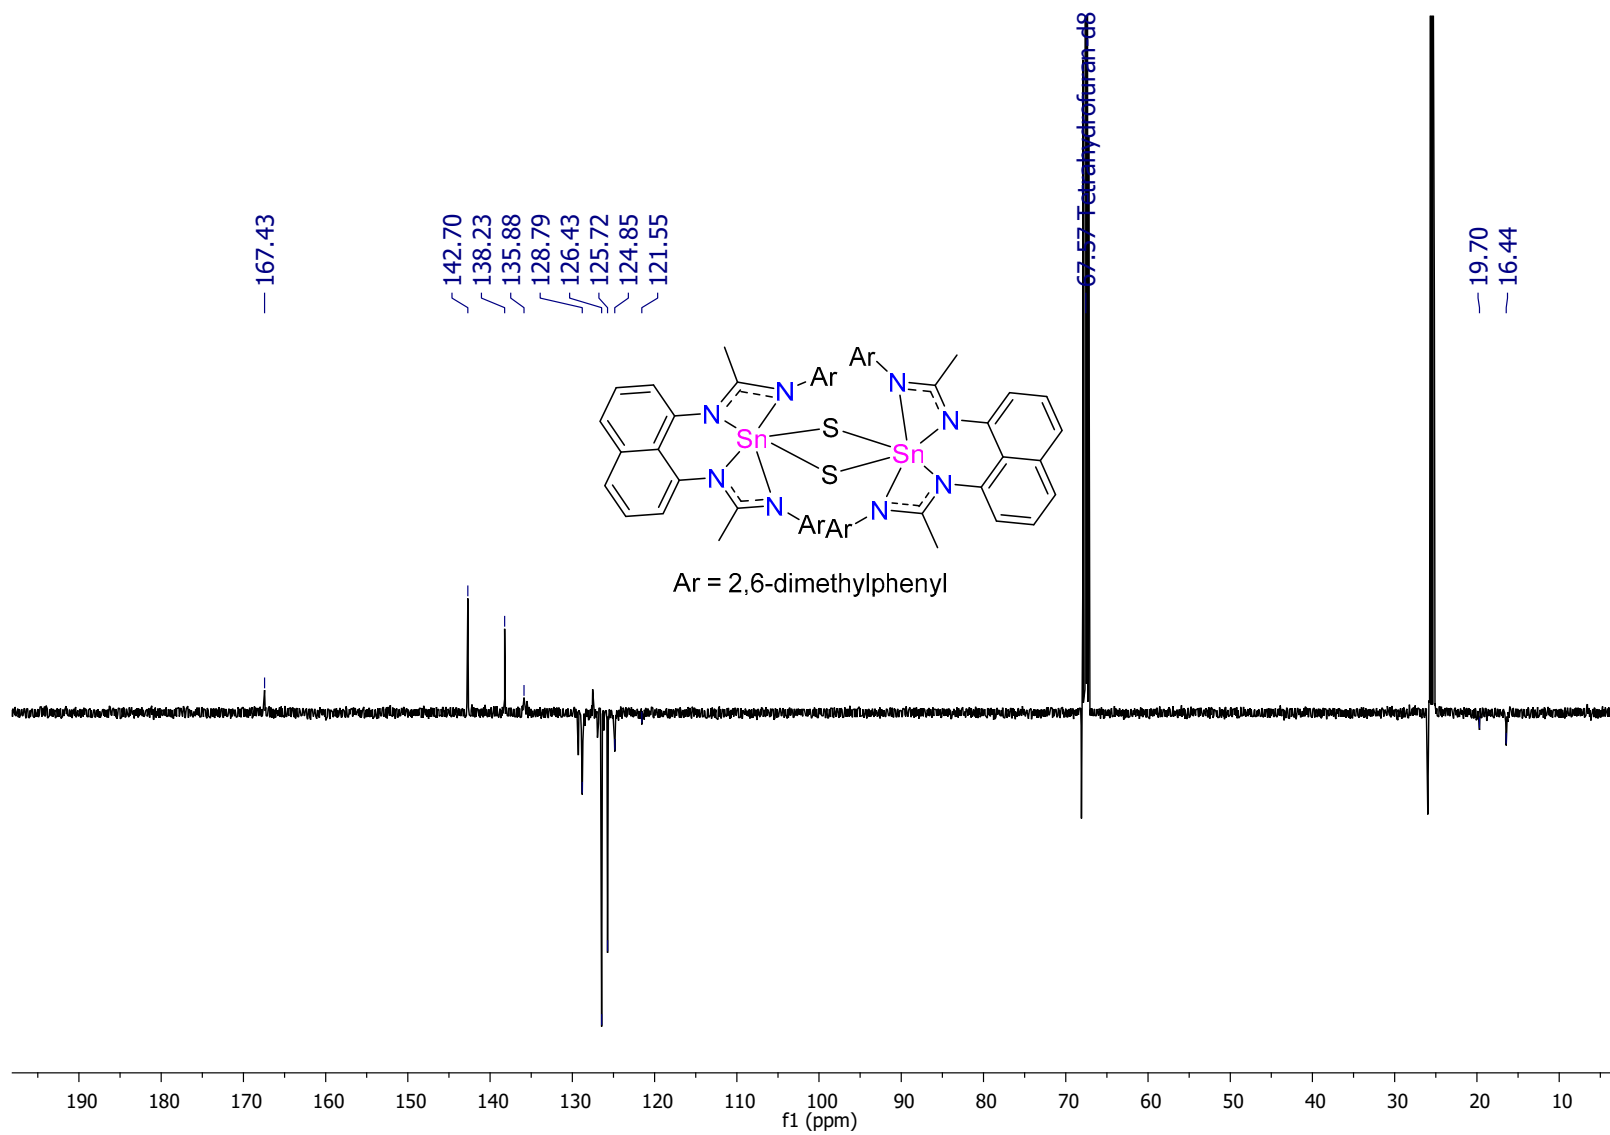

$^{13}\text{C}\{^1\text{H}\}$  NMR spectrum of compound **1b** (THF- $\text{d}_8$ , 125 MHz)

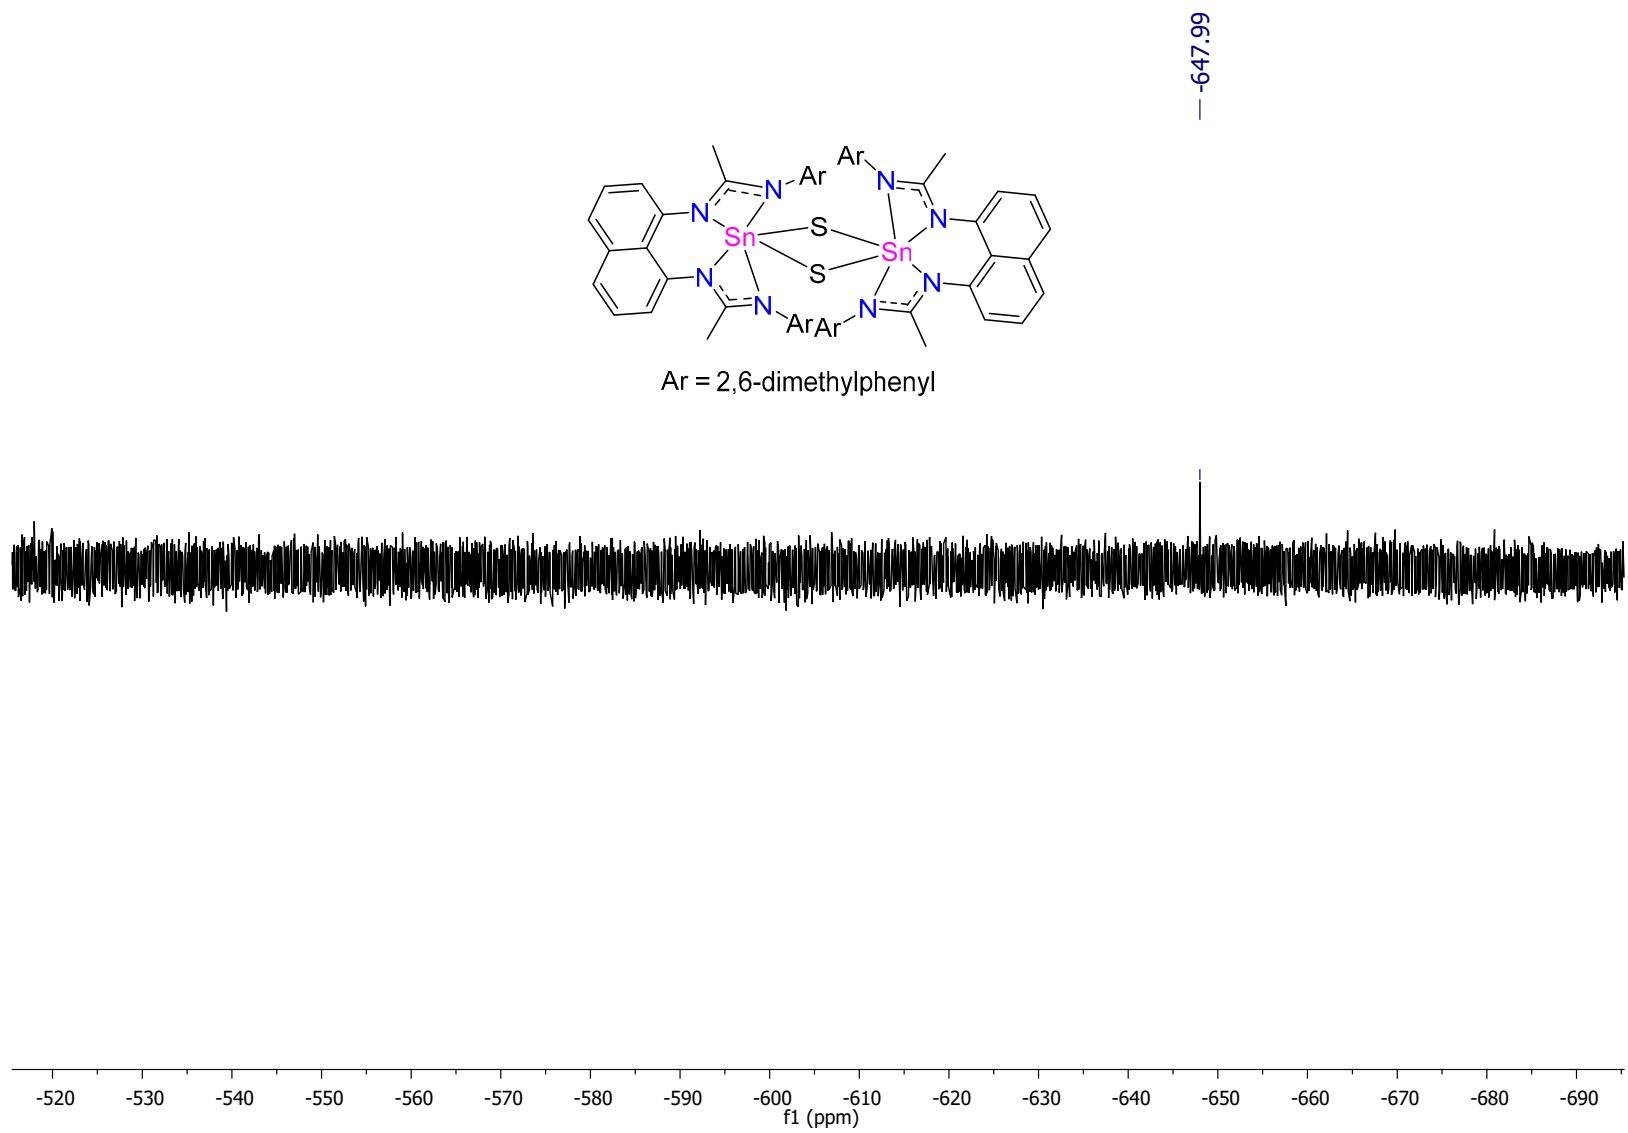

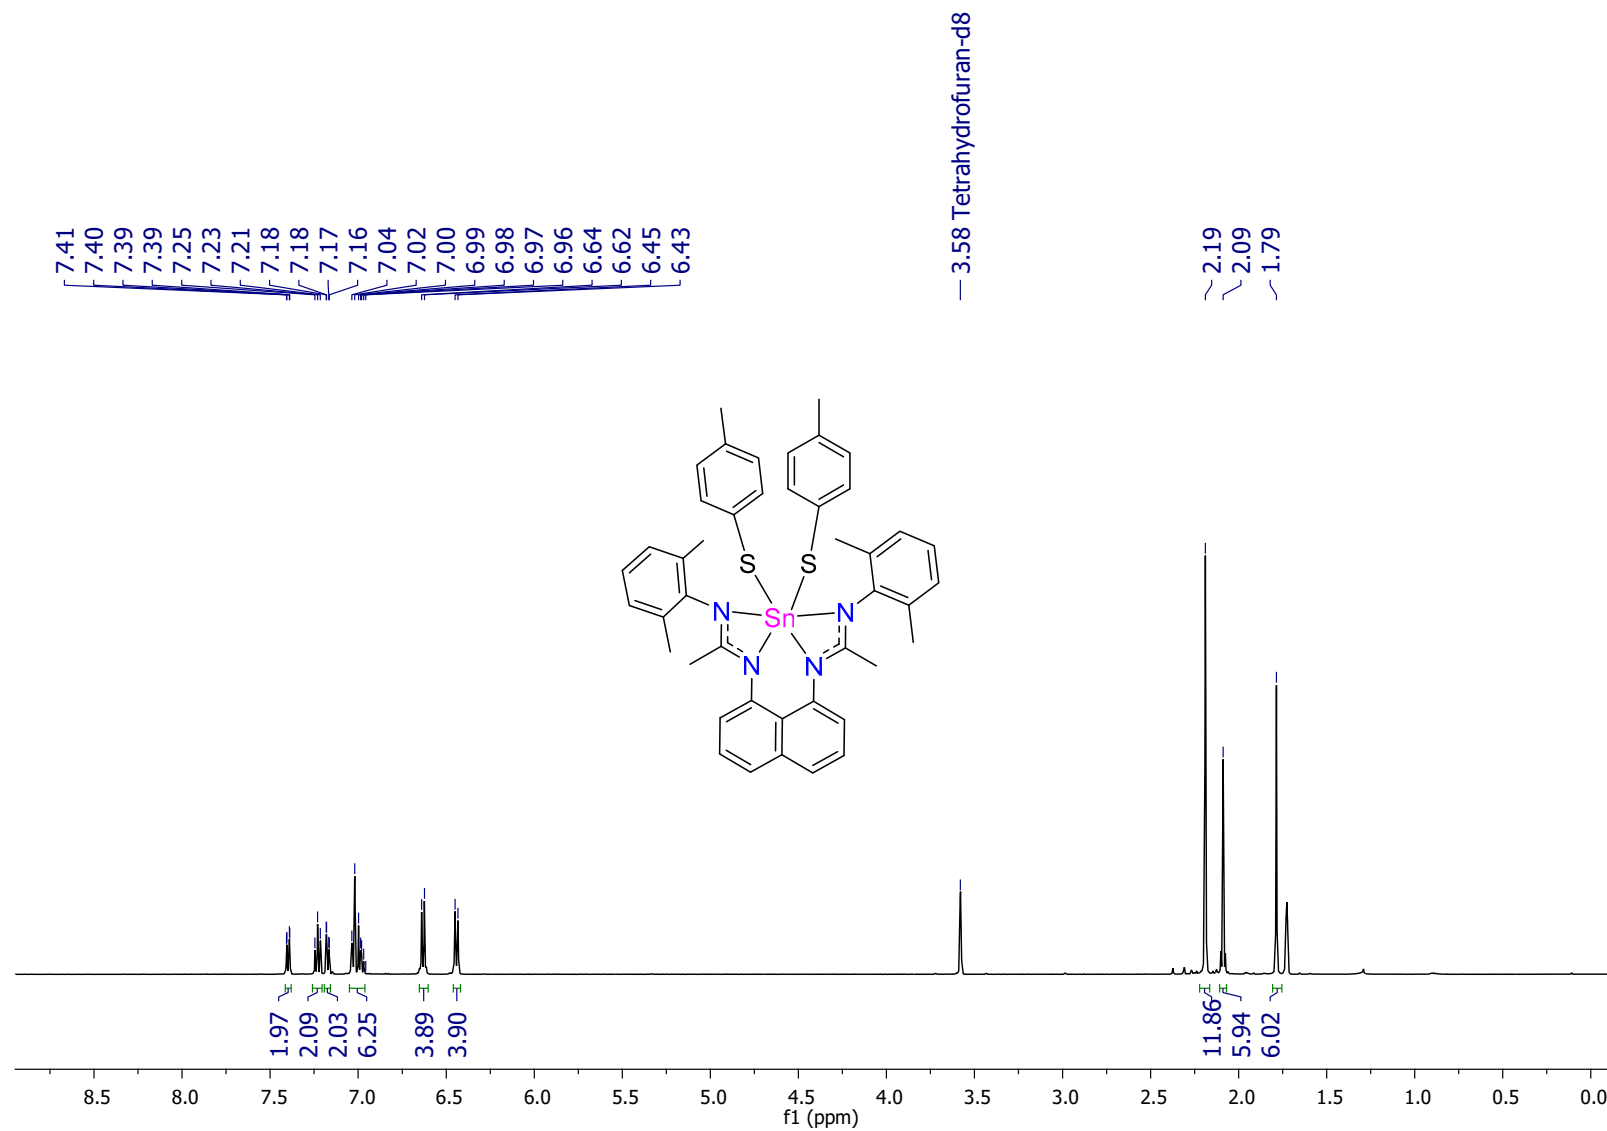

<sup>1</sup>H NMR spectrum of compound **2a** (THF-d<sub>8</sub>, 500 MHz)

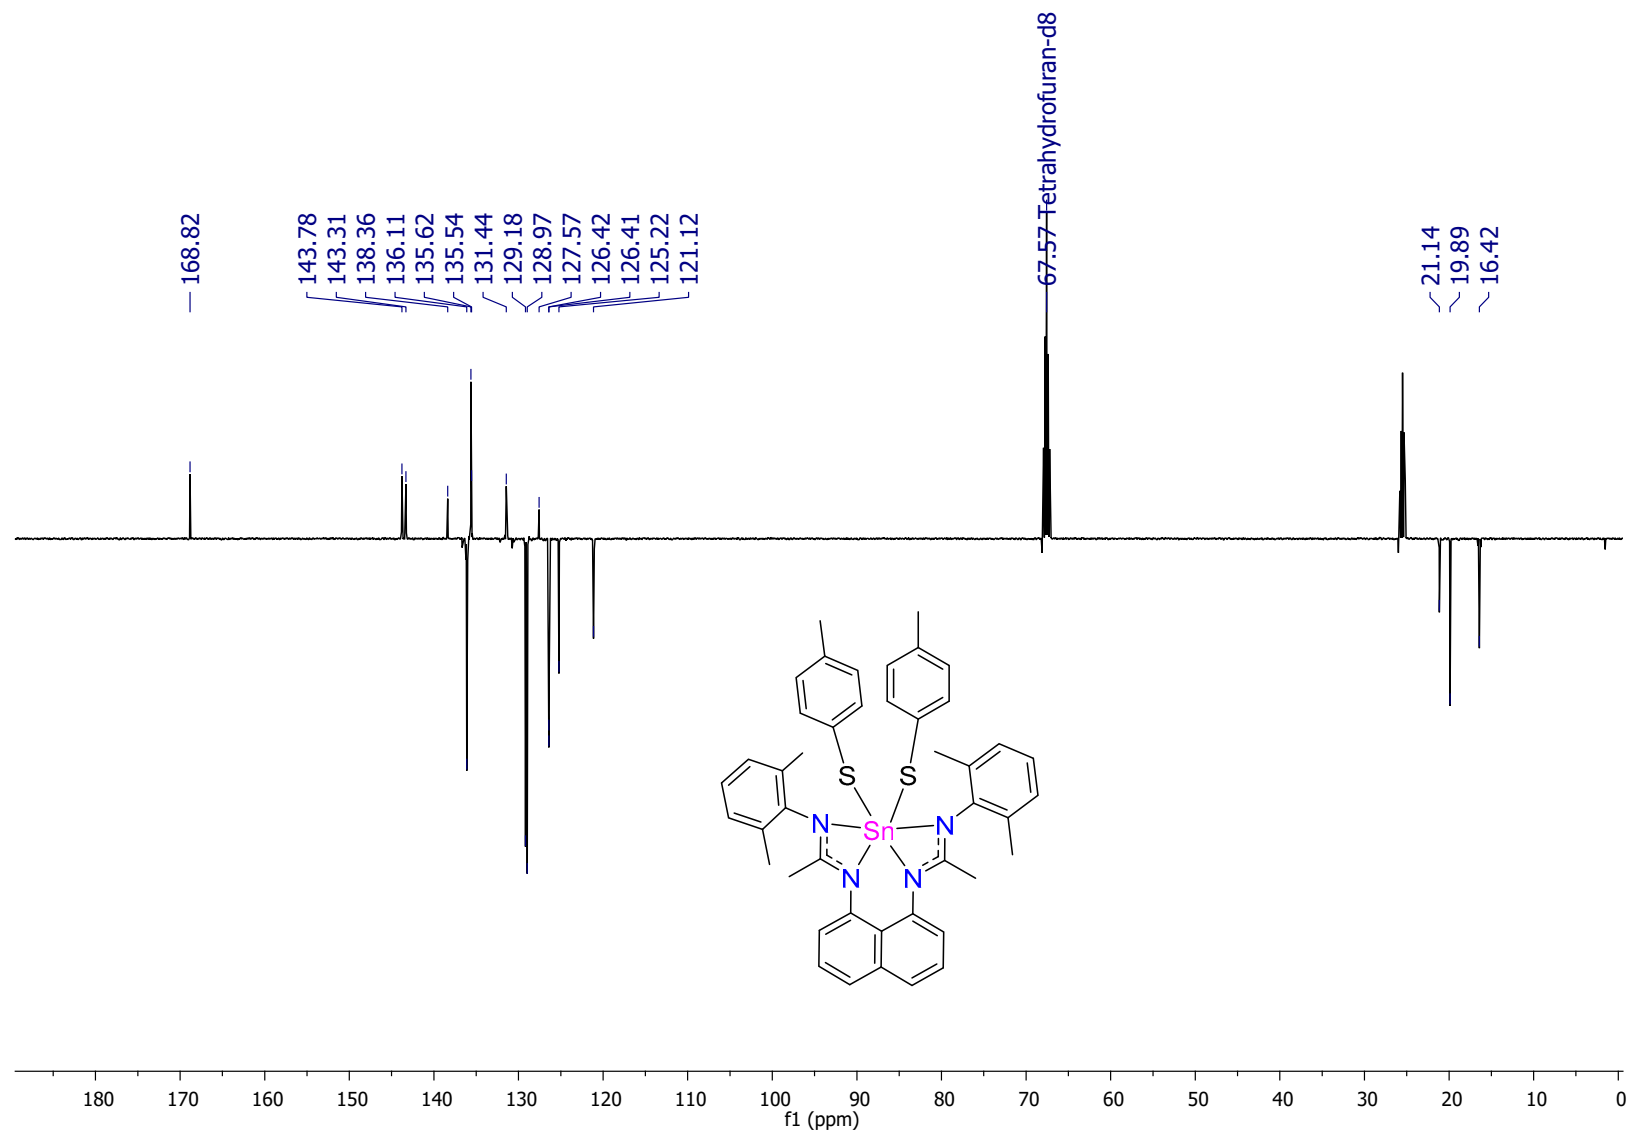

$^{13}\text{C}\{^1\text{H}\}$  NMR spectrum of compound **2a** (THF- $\text{d}_8$ , 125 MHz)

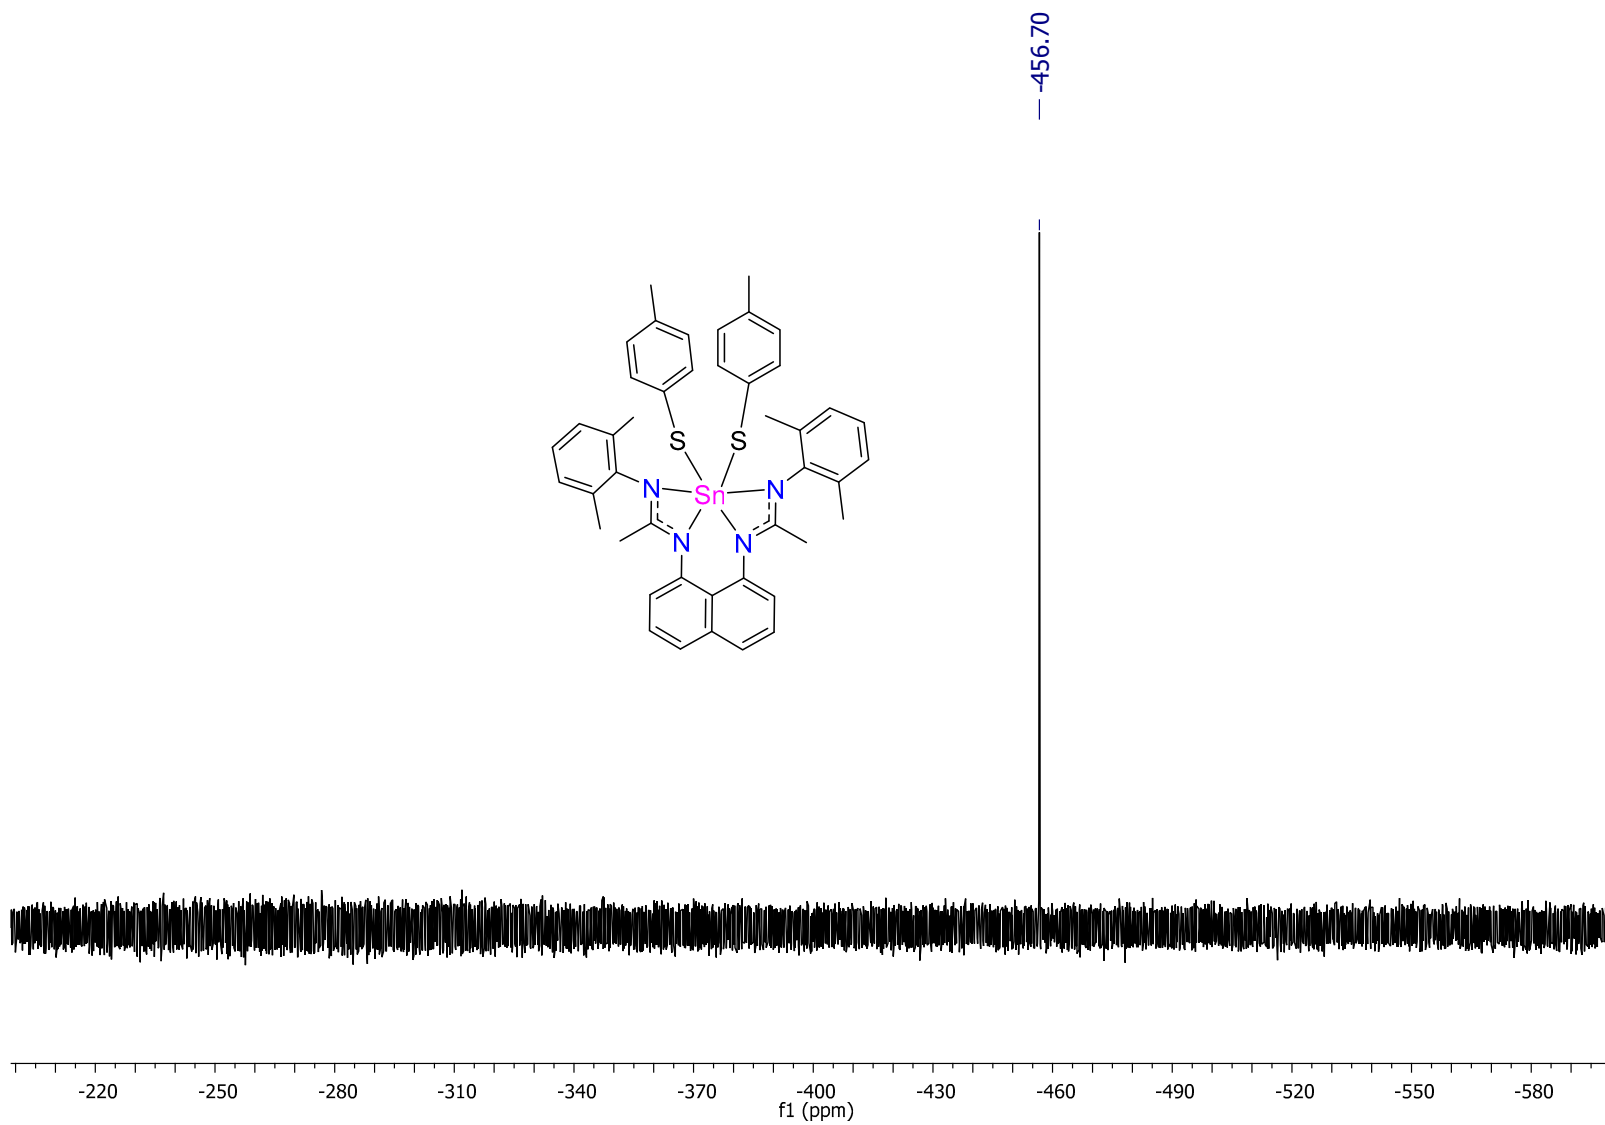

$^{119}\text{Sn}\{^1\text{H}\}$  NMR spectrum of compound **2a** ( $\text{THF-d}_8$ , 186 MHz)

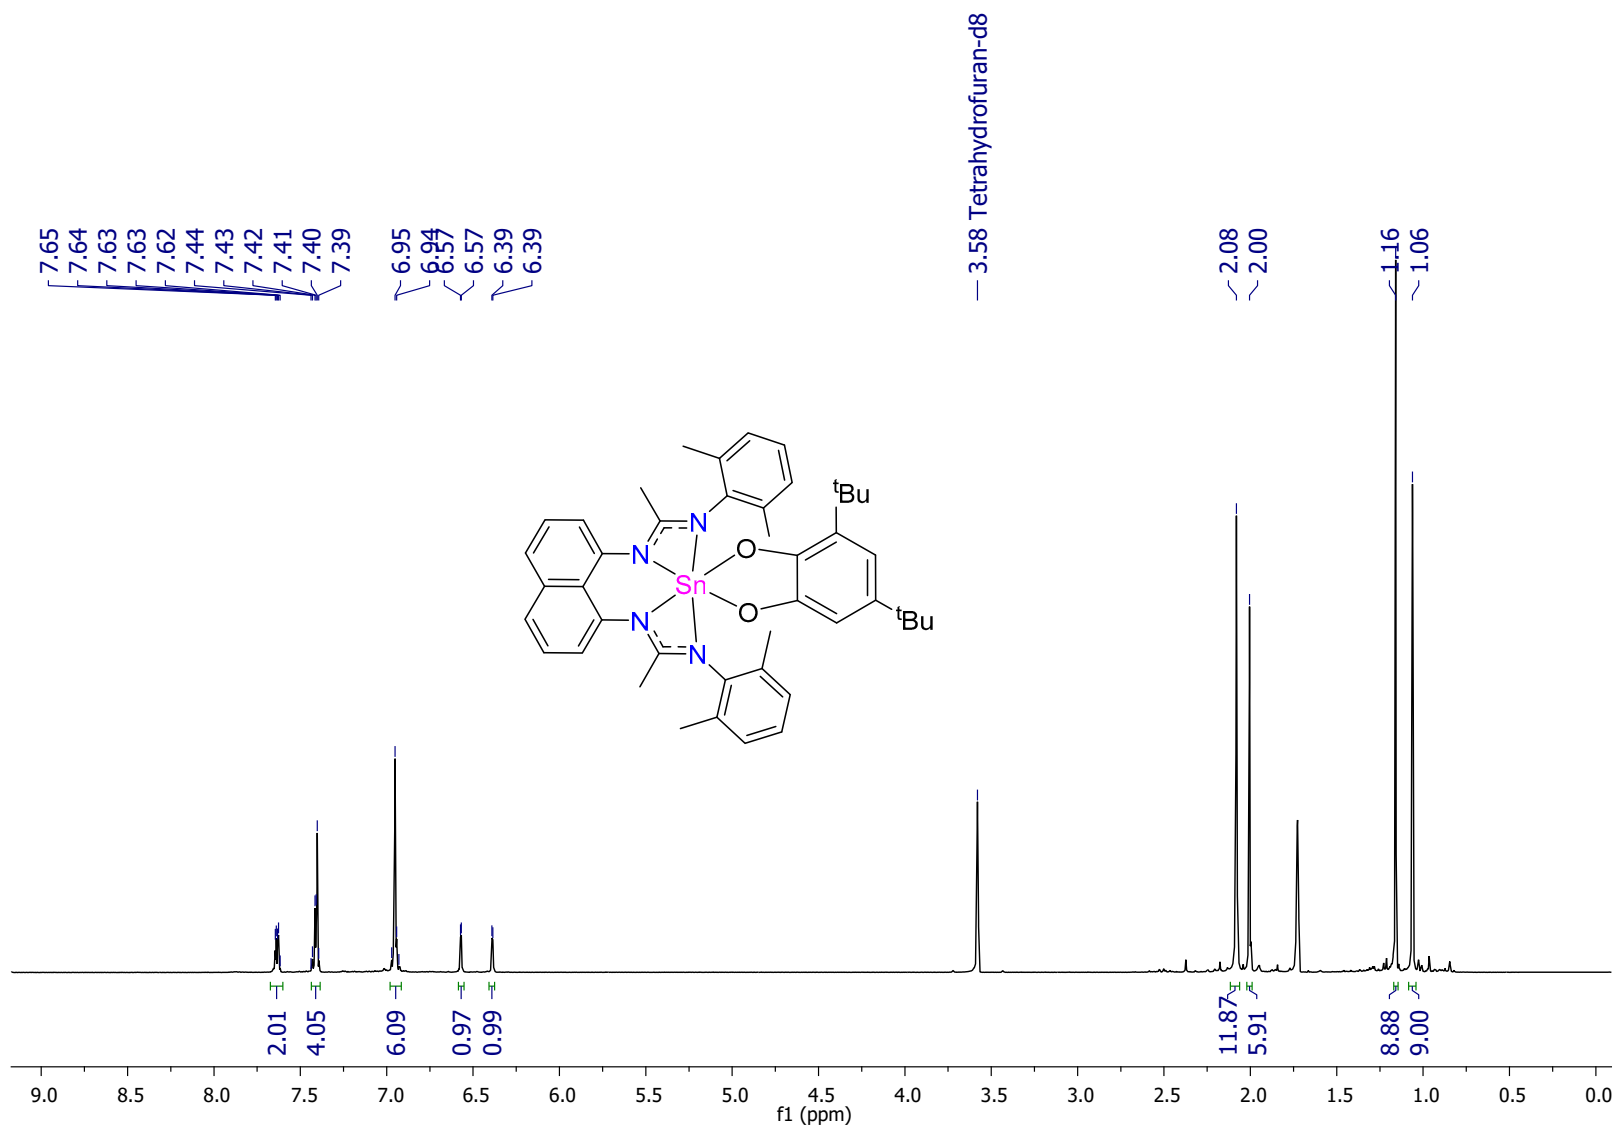

<sup>1</sup>H NMR spectrum of compound **2b** (THF-d<sub>8</sub>, 500 MHz)



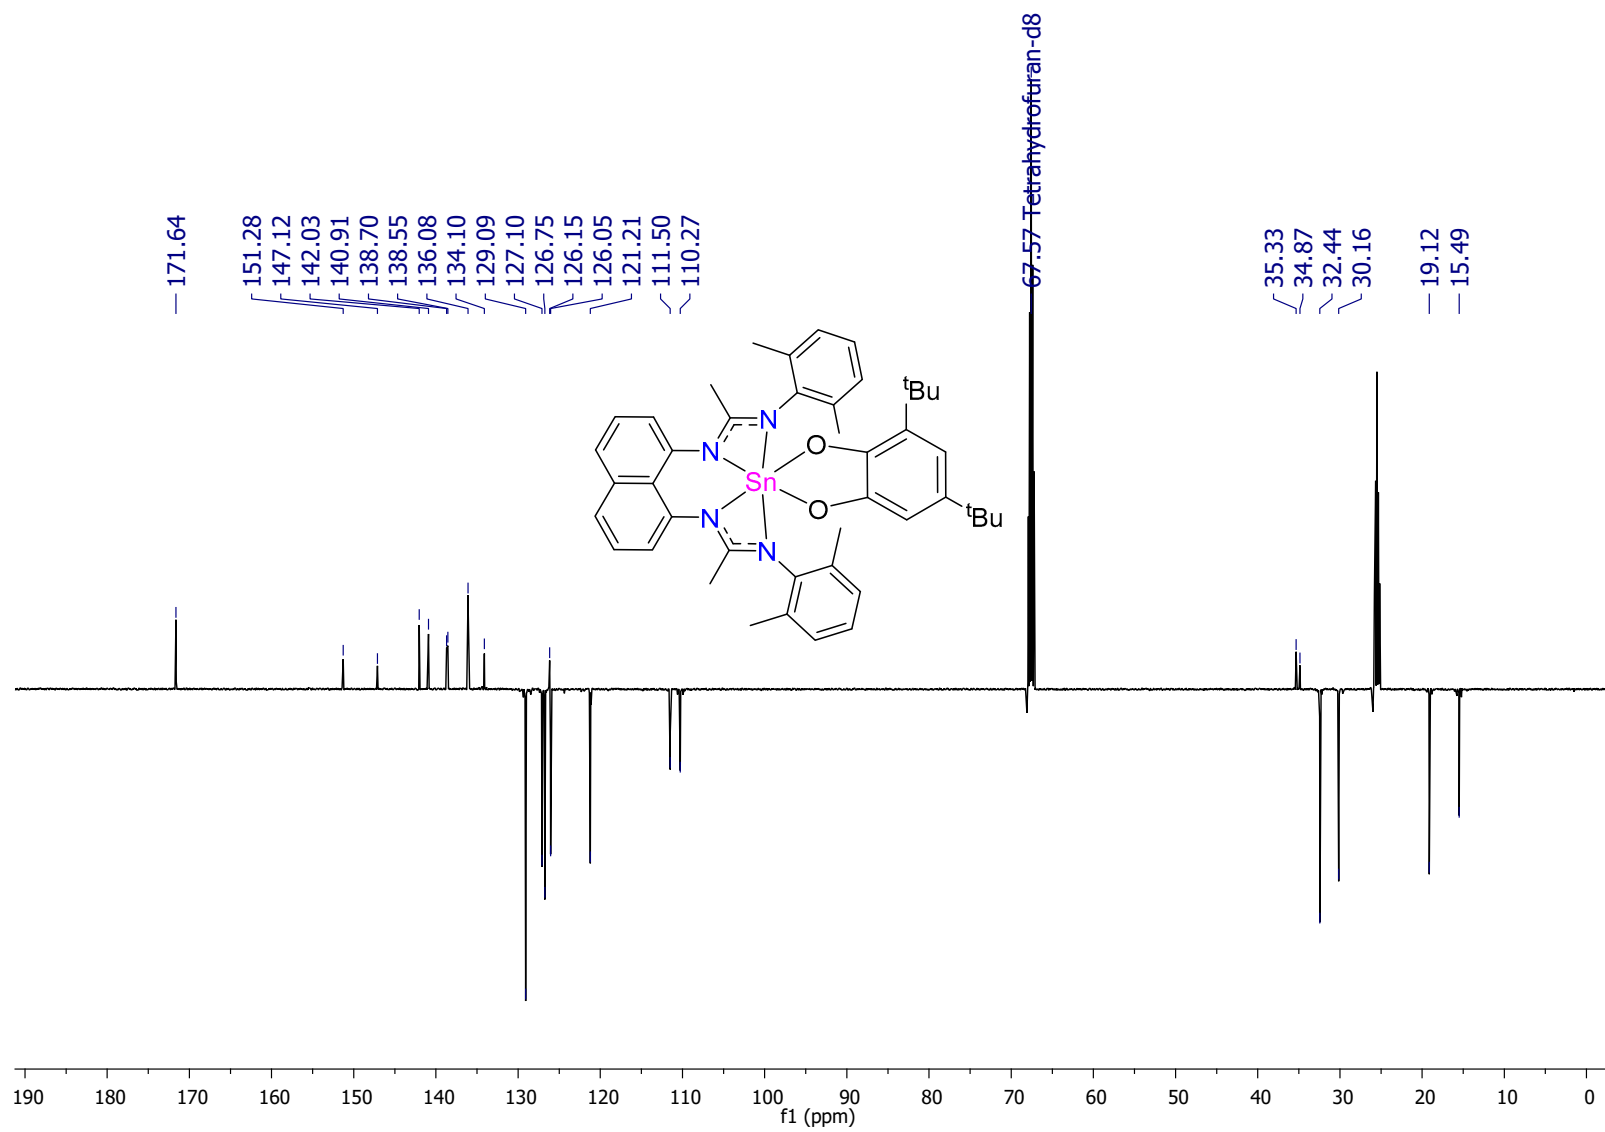

$^{13}\text{C}\{^1\text{H}\}$  NMR spectrum of compound **2b** (THF- $\text{d}_8$ , 125 MHz)

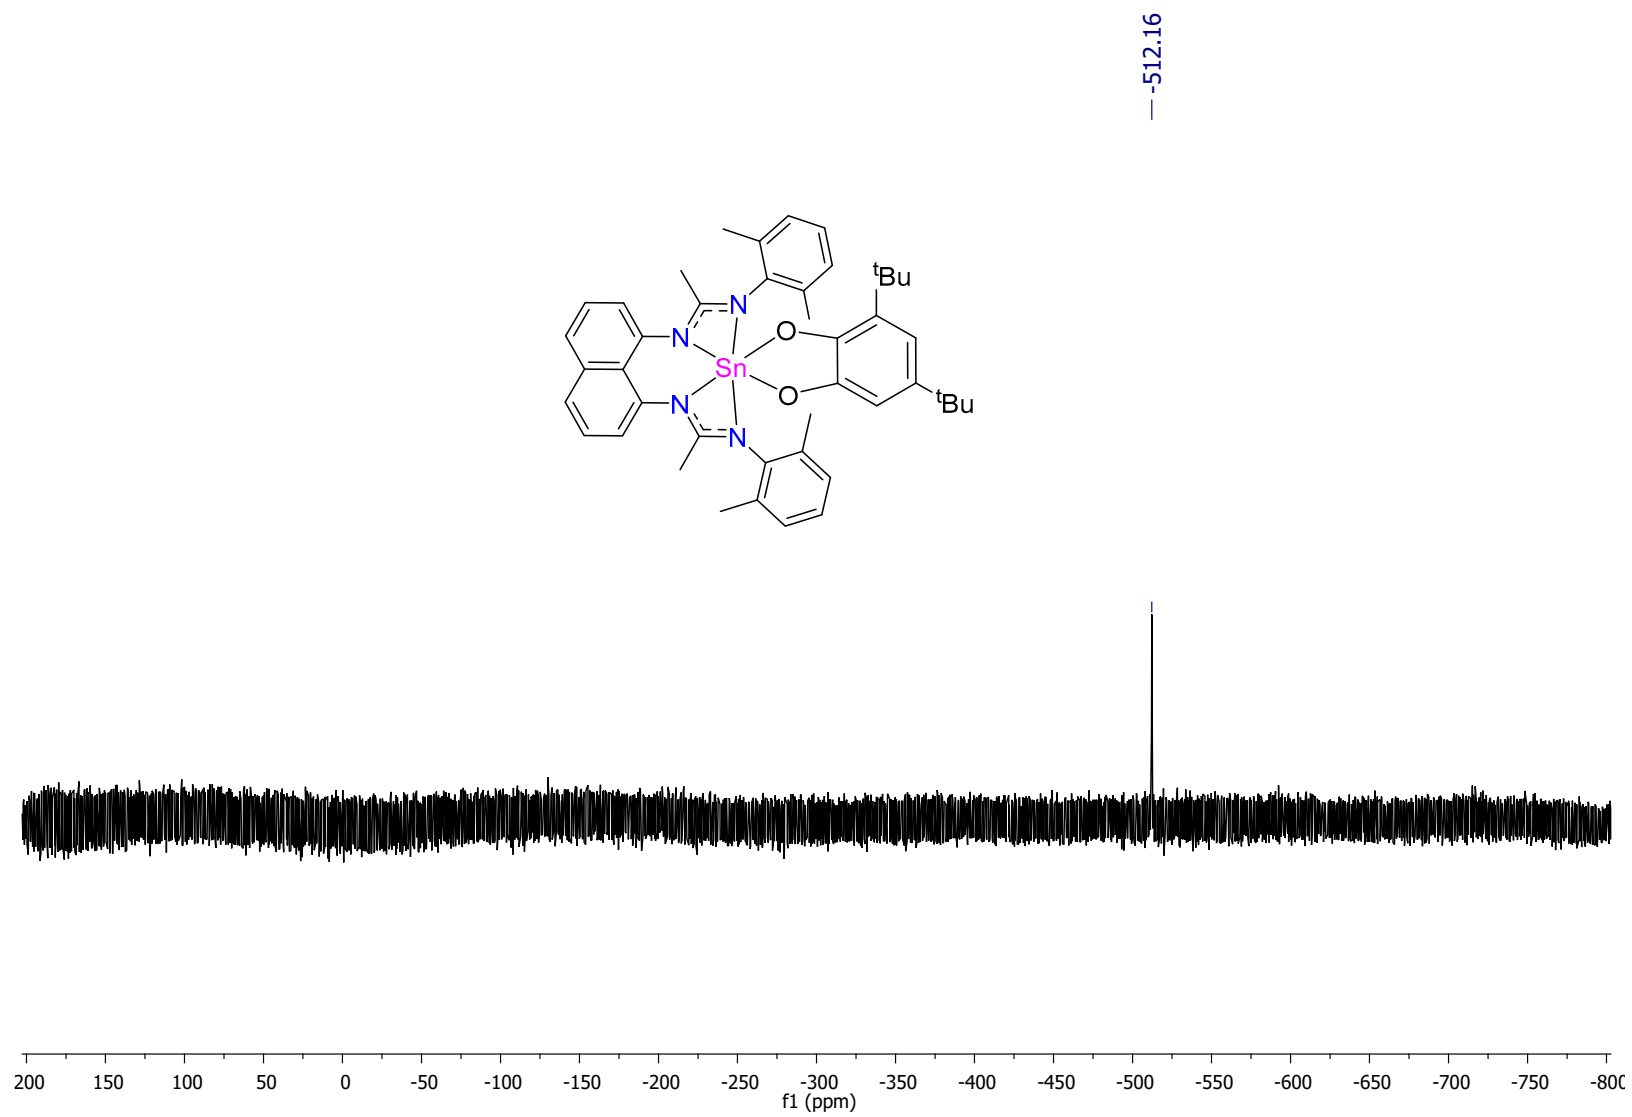

$^{119}\text{Sn}\{^1\text{H}\}$  NMR spectrum of compound **2b** (THF- $d_8$ , 186 MHz)

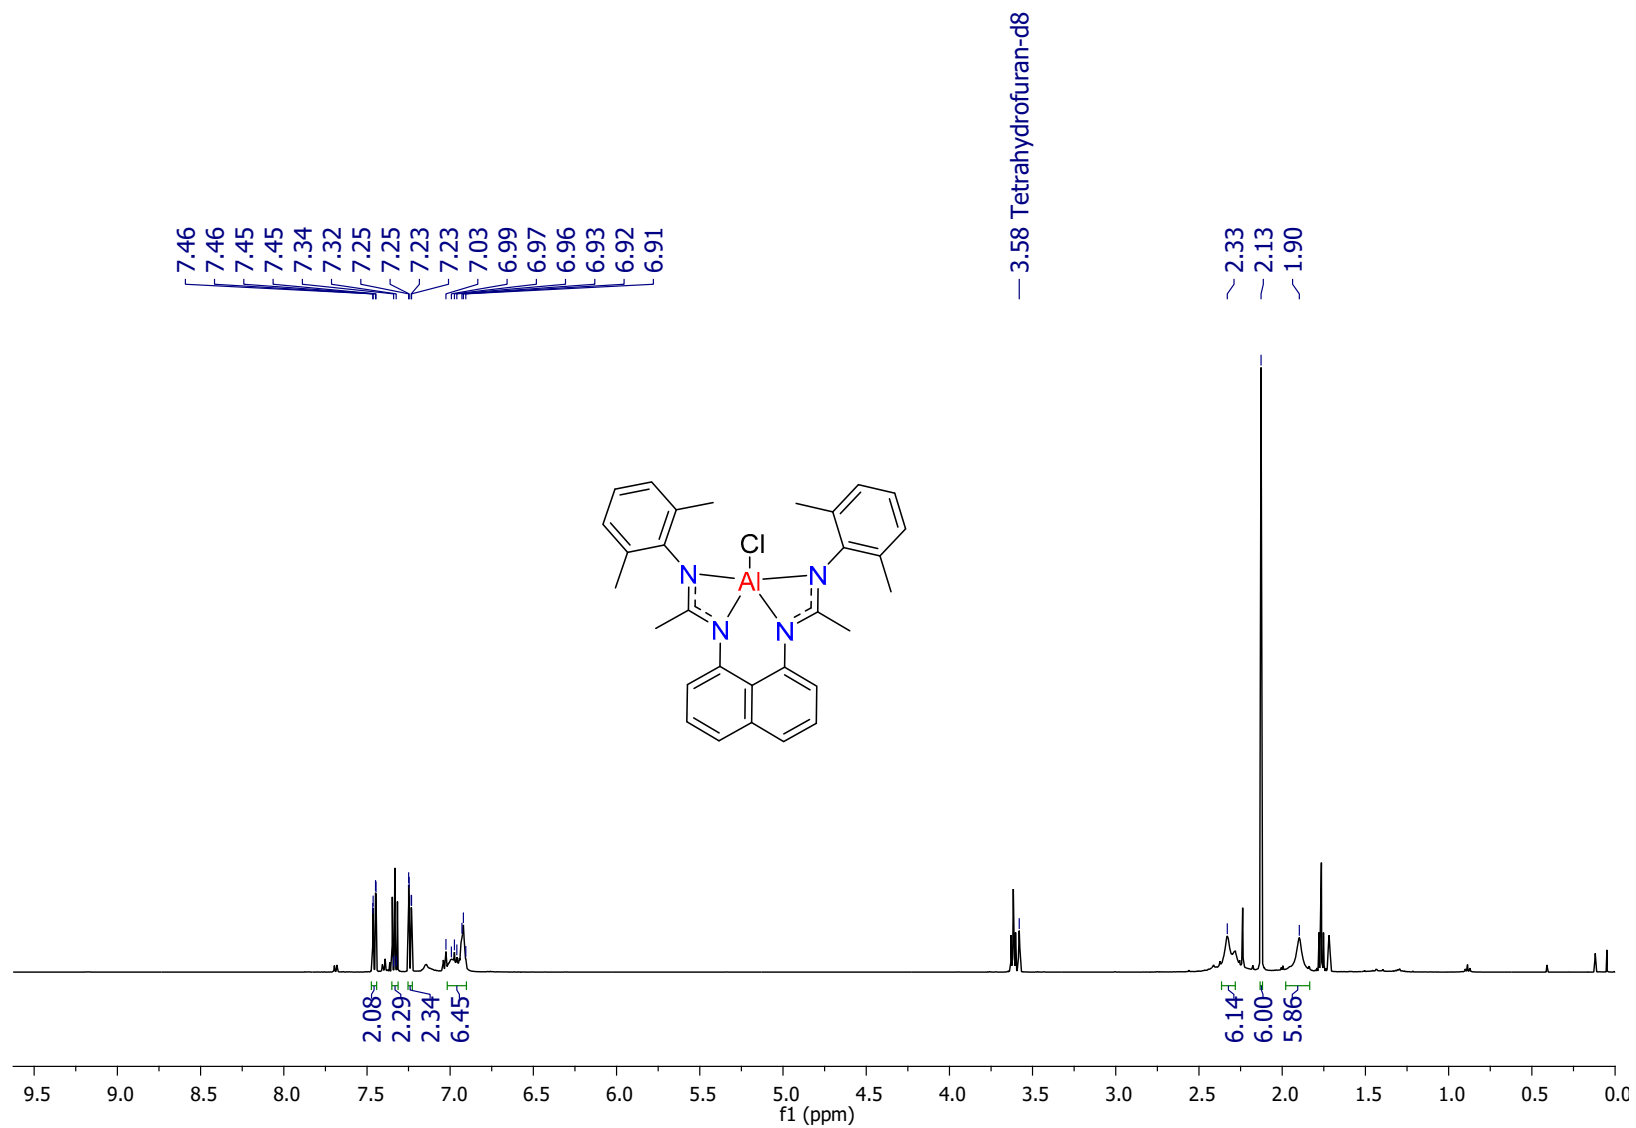

<sup>1</sup>H NMR spectrum of compound **3a** (THF-d<sub>8</sub>, 500 MHz)

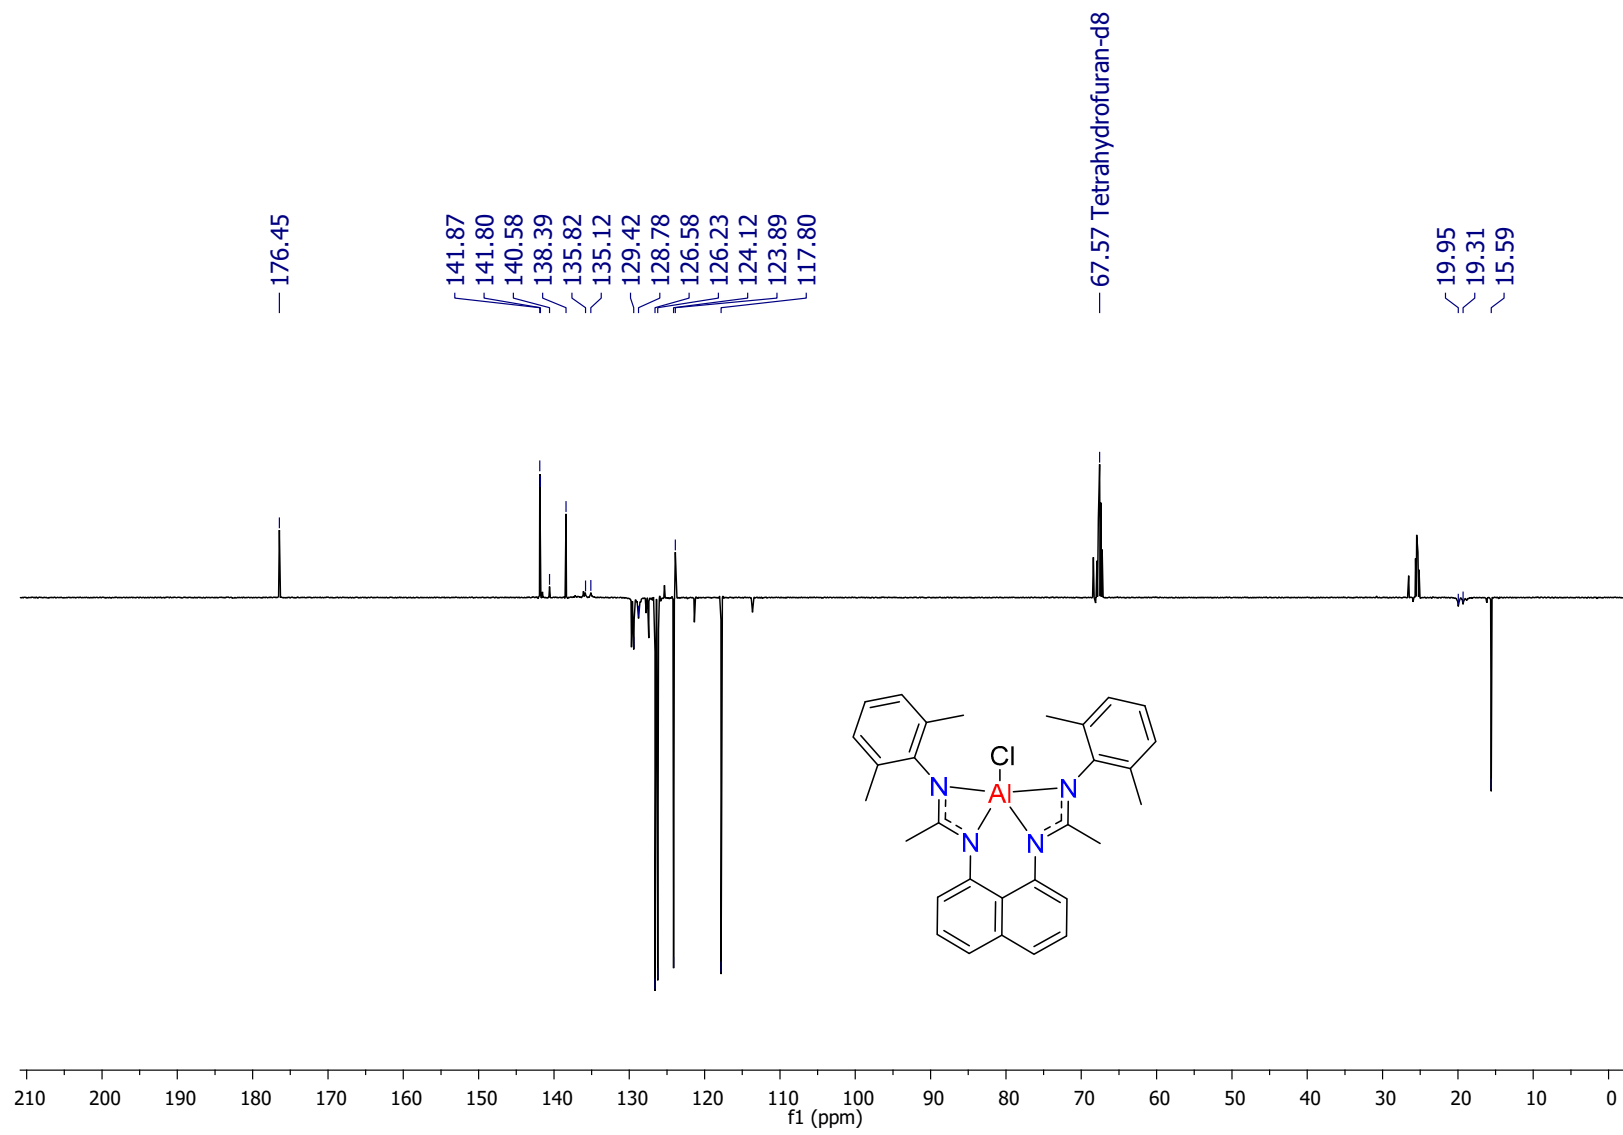

$^{13}\text{C}\{^1\text{H}\}$  NMR spectrum of compound **3a** (THF- $\text{d}_8$ , 125 MHz)

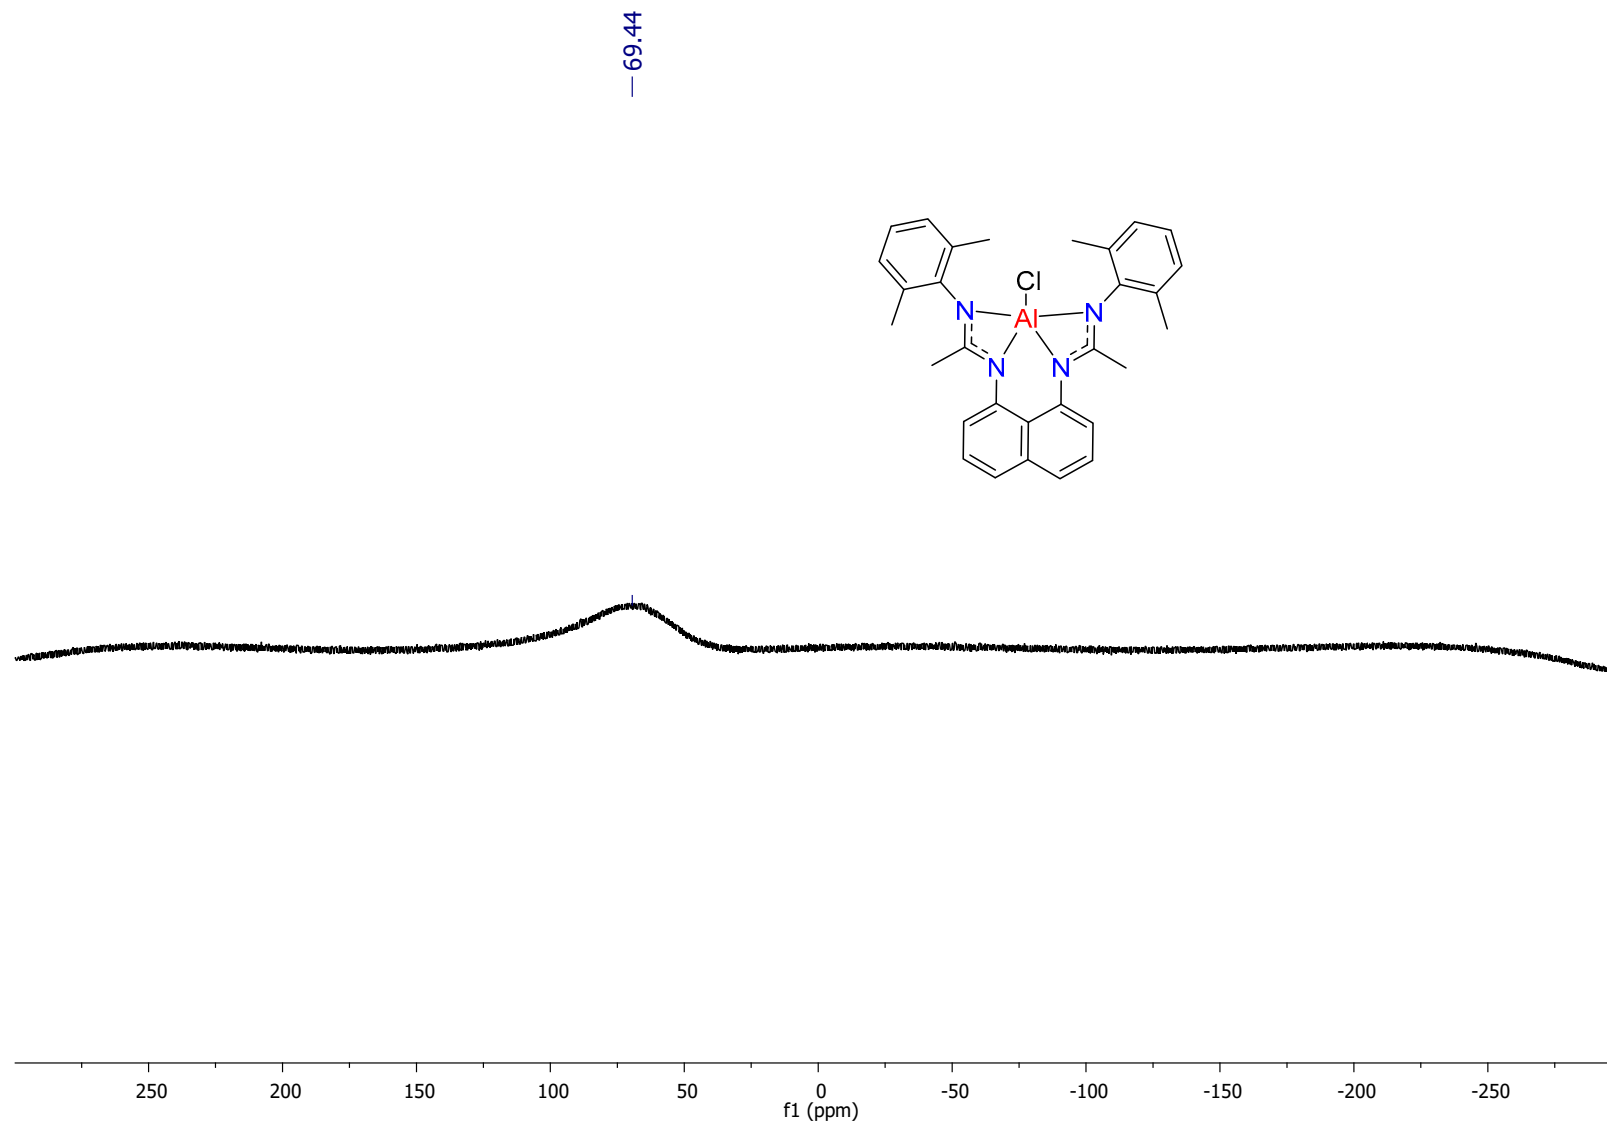

$^{27}\text{Al}\{^1\text{H}\}$  NMR spectrum of compound **3a** ( $\text{THF-d}_8$ , 130 MHz)

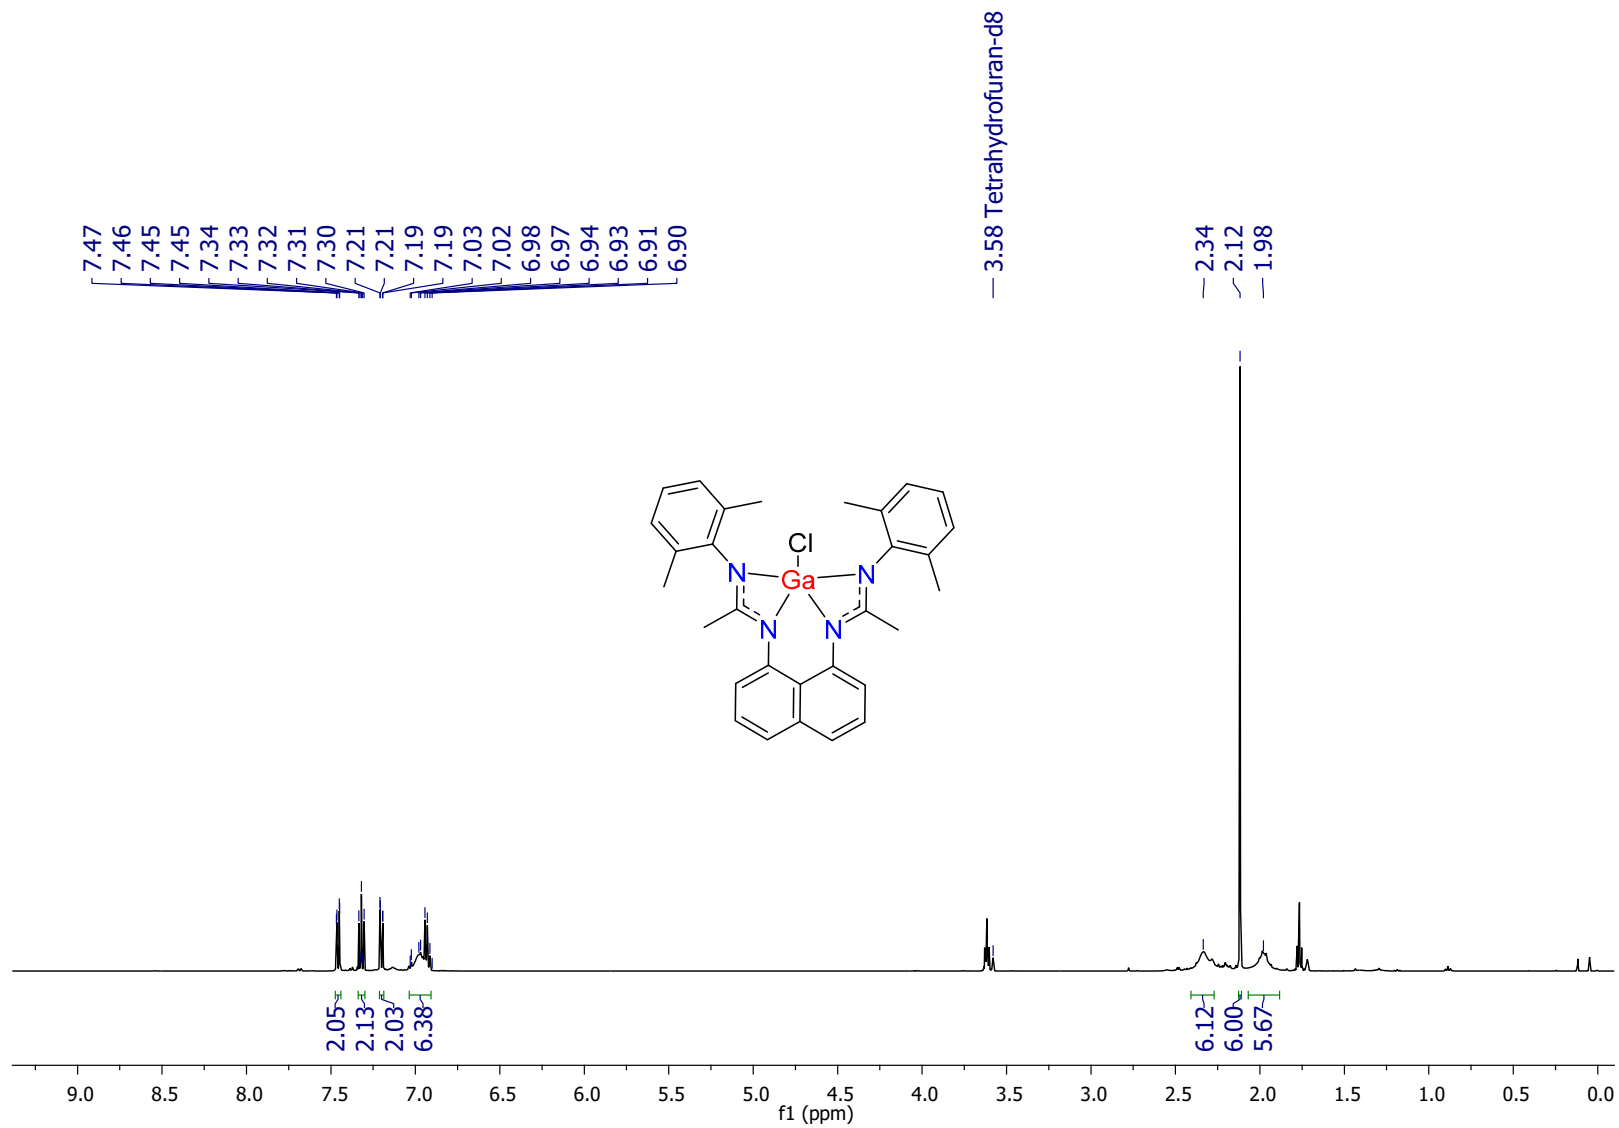

<sup>1</sup>H NMR spectrum of compound **3b** (THF-d<sub>8</sub>, 500 MHz)

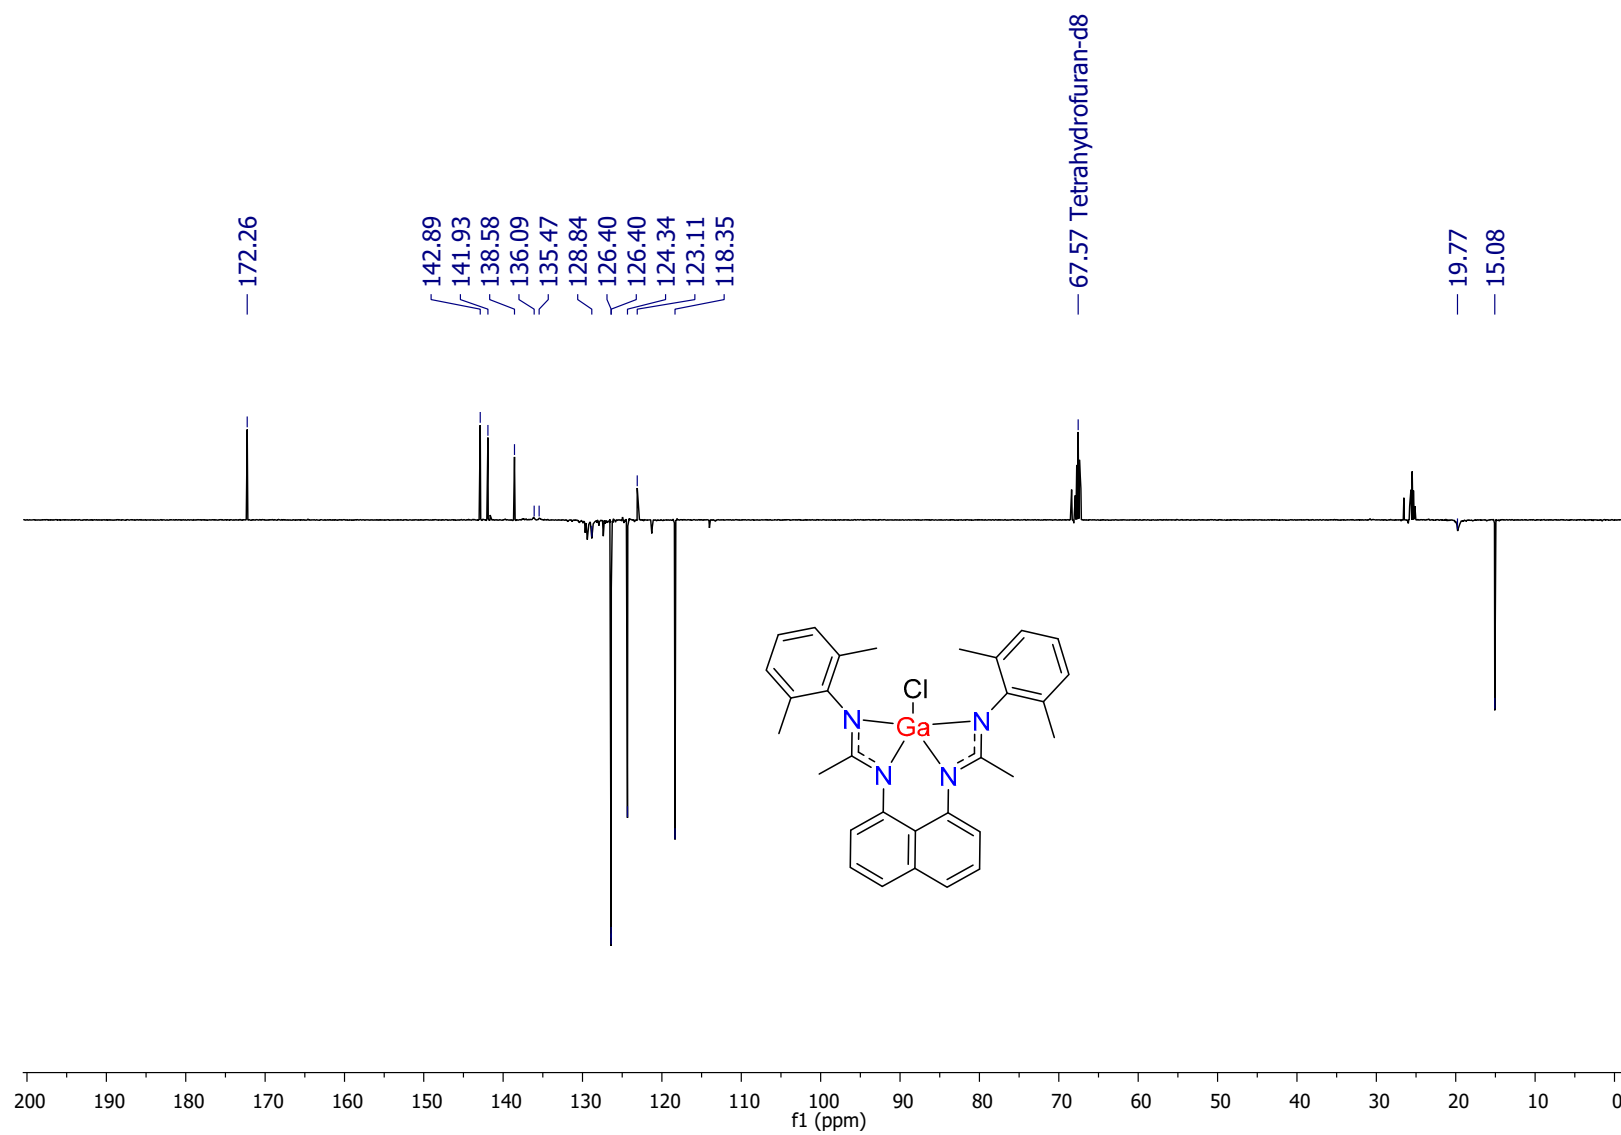

## Crystal data and structure refinement of compound L<sub>3</sub>H<sub>2</sub>

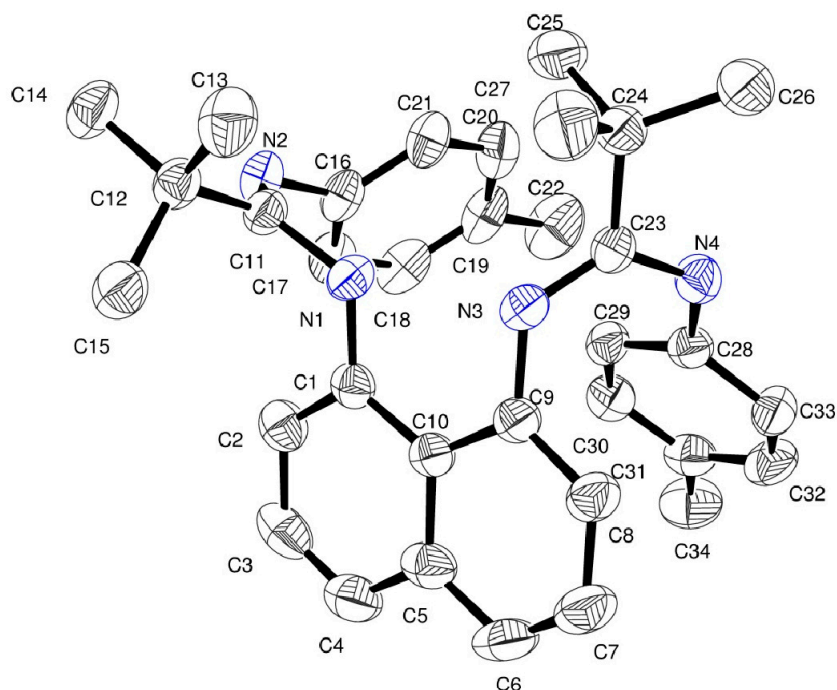

Figure S1. Asymmetric Unit

Table S1. Crystal data and structure refinement for R104.

|                             |                                                |                 |
|-----------------------------|------------------------------------------------|-----------------|
| Identification code         | R104                                           |                 |
| Empirical formula           | C <sub>34</sub> H <sub>40</sub> N <sub>4</sub> |                 |
| Formula weight              | 504.70                                         |                 |
| Temperature                 | 193 (2) K                                      |                 |
| Wavelength                  | 0.71073 Å                                      |                 |
| Crystal system, space group | Orthorhombic, P 21 21 21                       |                 |
| Unit cell dimensions        | a = 10.4214 (4) Å                              | alpha = 90 deg. |
|                             | b = 16.1580 (7) Å                              | beta = 90 deg.  |
|                             | c = 17.5675 (8) Å                              | gamma = 90 deg. |
| Volume                      | 2958.2 (2) Å <sup>3</sup>                      |                 |
| Z, Calculated density       | 4, 1.133 Mg/m <sup>3</sup>                     |                 |
| Absorption coefficient      | 0.067 mm <sup>-1</sup>                         |                 |



|                                   |                                             |
|-----------------------------------|---------------------------------------------|
| F(000)                            | 1088                                        |
| Crystal size                      | 0.180 x 0.160 x 0.100 mm                    |
| Theta range for data collection   | 2.639 to 25.376 deg.                        |
| Limiting indices                  | -12<=h<=12, -18<=k<=19,<br>-21<=l<=21       |
| Reflections collected / unique    | 45826 / 5433 [R(int) = 0.1088]              |
| Completeness to theta = 25.242    | 99.8 %                                      |
| Refinement method                 | Full-matrix least-squares on F <sup>2</sup> |
| Data / restraints / parameters    | 5433 / 0 / 359                              |
| Goodness-of-fit on F <sup>2</sup> | 1.030                                       |
| Final R indices [I>2sigma(I)]     | R1 = 0.0510, wR2 = 0.1244                   |
| R indices (all data)              | R1 = 0.0756, wR2 = 0.1404                   |
| Largest diff. peak and hole       | 0.762 and -0.156 e.A <sup>-3</sup>          |

Table S2. Atomic coordinates ( $\times 10^4$ ) and equivalent isotropic displacement parameters ( $\text{\AA}^2 \times 10^3$ ) for R104.  
 $U(\text{eq})$  is defined as one third of the trace of the orthogonalized  $U_{ij}$  tensor.

|       | x        | y       | z       | U(eq) |
|-------|----------|---------|---------|-------|
| C(1)  | 8472(3)  | 3199(2) | 2197(2) | 35(1) |
| C(2)  | 9235(4)  | 3678(3) | 2654(2) | 44(1) |
| C(3)  | 10477(4) | 3409(3) | 2863(3) | 54(1) |
| C(4)  | 10944(4) | 2678(3) | 2617(3) | 53(1) |
| C(5)  | 10202(4) | 2163(3) | 2141(2) | 45(1) |
| C(6)  | 10697(4) | 1404(3) | 1870(3) | 55(1) |
| C(7)  | 10001(4) | 909(3)  | 1406(3) | 55(1) |
| C(8)  | 8753(4)  | 1127(2) | 1200(2) | 43(1) |
| C(9)  | 8213(3)  | 1856(2) | 1457(2) | 35(1) |
| C(10) | 8935(3)  | 2410(2) | 1926(2) | 34(1) |
| C(11) | 6840(4)  | 4297(2) | 2095(2) | 36(1) |
| C(12) | 6932(4)  | 4882(2) | 1420(2) | 39(1) |
| C(13) | 6144(5)  | 4531(3) | 759(2)  | 59(1) |
| C(14) | 6417(4)  | 5738(3) | 1612(3) | 52(1) |
| C(15) | 8333(4)  | 4955(3) | 1176(3) | 52(1) |
| C(16) | 6200(4)  | 3962(2) | 3331(2) | 40(1) |
| C(17) | 6953(4)  | 3963(3) | 3975(2) | 47(1) |
| C(18) | 6691(5)  | 3425(3) | 4572(2) | 54(1) |
| C(19) | 5651(5)  | 2901(3) | 4557(2) | 53(1) |
| C(20) | 4872(5)  | 2921(3) | 3916(3) | 53(1) |
| C(21) | 5146(5)  | 3436(2) | 3314(2) | 46(1) |
| C(22) | 5392(6)  | 2320(3) | 5212(3) | 80(2) |
| C(23) | 5993(3)  | 1598(2) | 1292(2) | 32(1) |
| C(24) | 4758(4)  | 1812(2) | 863(2)  | 38(1) |
| C(25) | 4060(4)  | 2476(3) | 1336(3) | 56(1) |
| C(26) | 3865(4)  | 1068(3) | 774(2)  | 48(1) |
| C(27) | 5077(5)  | 2145(3) | 71(3)   | 59(1) |
| C(28) | 6650(3)  | 812(2)  | 2451(2) | 34(1) |
| C(29) | 6898(3)  | 1451(2) | 2950(2) | 36(1) |
| C(30) | 7495(4)  | 1292(3) | 3637(2) | 43(1) |
| C(31) | 7850(4)  | 501(3)  | 3853(2) | 43(1) |
| C(32) | 7610(4)  | -132(3) | 3347(3) | 49(1) |
| C(33) | 7035(4)  | 16(2)   | 2651(2) | 42(1) |
| C(34) | 8437(5)  | 340(3)  | 4628(3) | 65(1) |
| N(1)  | 7260(3)  | 3472(2) | 1969(2) | 36(1) |
| N(2)  | 6394(3)  | 4539(2) | 2732(2) | 40(1) |
| N(3)  | 6974(3)  | 2068(2) | 1191(2) | 34(1) |
| N(4)  | 5926(3)  | 932(2)  | 1777(2) | 39(1) |

Table S3. Bond lengths [Å] and angles [deg] for R104.

---

|              |          |
|--------------|----------|
| C(1)-C(2)    | 1.371(5) |
| C(1)-N(1)    | 1.397(5) |
| C(1)-C(10)   | 1.443(5) |
| C(2)-C(3)    | 1.414(6) |
| C(2)-H(2)    | 0.9500   |
| C(3)-C(4)    | 1.349(7) |
| C(3)-H(3)    | 0.9500   |
| C(4)-C(5)    | 1.409(6) |
| C(4)-H(4)    | 0.9500   |
| C(5)-C(6)    | 1.414(6) |
| C(5)-C(10)   | 1.431(5) |
| C(6)-C(7)    | 1.352(7) |
| C(6)-H(6)    | 0.9500   |
| C(7)-C(8)    | 1.395(6) |
| C(7)-H(7)    | 0.9500   |
| C(8)-C(9)    | 1.381(5) |
| C(8)-H(8)    | 0.9500   |
| C(9)-N(3)    | 1.416(5) |
| C(9)-C(10)   | 1.430(5) |
| C(11)-N(2)   | 1.272(5) |
| C(11)-N(1)   | 1.421(5) |
| C(11)-C(12)  | 1.519(5) |
| C(12)-C(14)  | 1.521(5) |
| C(12)-C(15)  | 1.526(6) |
| C(12)-C(13)  | 1.531(6) |
| C(13)-H(13A) | 0.9800   |
| C(13)-H(13B) | 0.9800   |
| C(13)-H(13C) | 0.9800   |
| C(14)-H(14A) | 0.9800   |
| C(14)-H(14B) | 0.9800   |
| C(14)-H(14C) | 0.9800   |
| C(15)-H(15A) | 0.9800   |
| C(15)-H(15B) | 0.9800   |
| C(15)-H(15C) | 0.9800   |
| C(16)-C(17)  | 1.378(6) |
| C(16)-C(21)  | 1.389(6) |
| C(16)-N(2)   | 1.421(5) |
| C(17)-C(18)  | 1.389(6) |
| C(17)-H(17)  | 0.9500   |
| C(18)-C(19)  | 1.376(7) |
| C(18)-H(18)  | 0.9500   |
| C(19)-C(20)  | 1.389(7) |
| C(19)-C(22)  | 1.509(6) |
| C(20)-C(21)  | 1.376(6) |
| C(20)-H(20)  | 0.9500   |
| C(21)-H(21)  | 0.9500   |
| C(22)-H(22A) | 0.9800   |
| C(22)-H(22B) | 0.9800   |
| C(22)-H(22C) | 0.9800   |
| C(23)-N(3)   | 1.286(5) |
| C(23)-N(4)   | 1.373(5) |

|                     |          |
|---------------------|----------|
| C(23) - C(24)       | 1.531(5) |
| C(24) - C(27)       | 1.528(6) |
| C(24) - C(26)       | 1.529(5) |
| C(24) - C(25)       | 1.540(6) |
| C(25) - H(25A)      | 0.9800   |
| C(25) - H(25B)      | 0.9800   |
| C(25) - H(25C)      | 0.9800   |
| C(26) - H(26A)      | 0.9800   |
| C(26) - H(26B)      | 0.9800   |
| C(26) - H(26C)      | 0.9800   |
| C(27) - H(27A)      | 0.9800   |
| C(27) - H(27B)      | 0.9800   |
| C(27) - H(27C)      | 0.9800   |
| C(28) - C(29)       | 1.380(5) |
| C(28) - C(33)       | 1.392(5) |
| C(28) - N(4)        | 1.419(5) |
| C(29) - C(30)       | 1.382(5) |
| C(29) - H(29)       | 0.9500   |
| C(30) - C(31)       | 1.383(6) |
| C(30) - H(30)       | 0.9500   |
| C(31) - C(32)       | 1.378(6) |
| C(31) - C(34)       | 1.515(6) |
| C(32) - C(33)       | 1.383(6) |
| C(32) - H(32)       | 0.9500   |
| C(33) - H(33)       | 0.9500   |
| C(34) - H(34A)      | 0.9800   |
| C(34) - H(34B)      | 0.9800   |
| C(34) - H(34C)      | 0.9800   |
| N(1) - H(1)         | 0.89(5)  |
| N(4) - H(4A)        | 0.89(5)  |
|                     |          |
| C(2) - C(1) - N(1)  | 120.9(4) |
| C(2) - C(1) - C(10) | 119.9(3) |
| N(1) - C(1) - C(10) | 119.1(3) |
| C(1) - C(2) - C(3)  | 120.6(4) |
| C(1) - C(2) - H(2)  | 119.7    |
| C(3) - C(2) - H(2)  | 119.7    |
| C(4) - C(3) - C(2)  | 121.1(4) |
| C(4) - C(3) - H(3)  | 119.5    |
| C(2) - C(3) - H(3)  | 119.5    |
| C(3) - C(4) - C(5)  | 120.6(4) |
| C(3) - C(4) - H(4)  | 119.7    |
| C(5) - C(4) - H(4)  | 119.7    |
| C(4) - C(5) - C(6)  | 120.8(4) |
| C(4) - C(5) - C(10) | 119.9(4) |
| C(6) - C(5) - C(10) | 119.3(4) |
| C(7) - C(6) - C(5)  | 121.4(4) |
| C(7) - C(6) - H(6)  | 119.3    |
| C(5) - C(6) - H(6)  | 119.3    |
| C(6) - C(7) - C(8)  | 120.5(4) |
| C(6) - C(7) - H(7)  | 119.8    |
| C(8) - C(7) - H(7)  | 119.8    |
| C(9) - C(8) - C(7)  | 120.7(4) |
| C(9) - C(8) - H(8)  | 119.7    |

|                     |          |
|---------------------|----------|
| C(7)-C(8)-H(8)      | 119.7    |
| C(8)-C(9)-N(3)      | 118.0(3) |
| C(8)-C(9)-C(10)     | 120.5(3) |
| N(3)-C(9)-C(10)     | 121.2(3) |
| C(9)-C(10)-C(5)     | 117.6(3) |
| C(9)-C(10)-C(1)     | 124.5(3) |
| C(5)-C(10)-C(1)     | 117.8(4) |
| N(2)-C(11)-N(1)     | 122.5(3) |
| N(2)-C(11)-C(12)    | 121.2(3) |
| N(1)-C(11)-C(12)    | 116.2(3) |
| C(11)-C(12)-C(14)   | 111.7(3) |
| C(11)-C(12)-C(15)   | 109.1(3) |
| C(14)-C(12)-C(15)   | 109.2(3) |
| C(11)-C(12)-C(13)   | 109.2(3) |
| C(14)-C(12)-C(13)   | 108.4(4) |
| C(15)-C(12)-C(13)   | 109.2(4) |
| C(12)-C(13)-H(13A)  | 109.5    |
| C(12)-C(13)-H(13B)  | 109.5    |
| H(13A)-C(13)-H(13B) | 109.5    |
| C(12)-C(13)-H(13C)  | 109.5    |
| H(13A)-C(13)-H(13C) | 109.5    |
| H(13B)-C(13)-H(13C) | 109.5    |
| C(12)-C(14)-H(14A)  | 109.5    |
| C(12)-C(14)-H(14B)  | 109.5    |
| H(14A)-C(14)-H(14B) | 109.5    |
| C(12)-C(14)-H(14C)  | 109.5    |
| H(14A)-C(14)-H(14C) | 109.5    |
| H(14B)-C(14)-H(14C) | 109.5    |
| C(12)-C(15)-H(15A)  | 109.5    |
| C(12)-C(15)-H(15B)  | 109.5    |
| H(15A)-C(15)-H(15B) | 109.5    |
| C(12)-C(15)-H(15C)  | 109.5    |
| H(15A)-C(15)-H(15C) | 109.5    |
| H(15B)-C(15)-H(15C) | 109.5    |
| C(17)-C(16)-C(21)   | 118.0(4) |
| C(17)-C(16)-N(2)    | 121.8(4) |
| C(21)-C(16)-N(2)    | 119.9(4) |
| C(16)-C(17)-C(18)   | 120.5(4) |
| C(16)-C(17)-H(17)   | 119.7    |
| C(18)-C(17)-H(17)   | 119.7    |
| C(19)-C(18)-C(17)   | 121.7(4) |
| C(19)-C(18)-H(18)   | 119.1    |
| C(17)-C(18)-H(18)   | 119.1    |
| C(18)-C(19)-C(20)   | 117.5(4) |
| C(18)-C(19)-C(22)   | 120.6(5) |
| C(20)-C(19)-C(22)   | 121.9(5) |
| C(21)-C(20)-C(19)   | 121.0(4) |
| C(21)-C(20)-H(20)   | 119.5    |
| C(19)-C(20)-H(20)   | 119.5    |
| C(20)-C(21)-C(16)   | 121.2(4) |
| C(20)-C(21)-H(21)   | 119.4    |
| C(16)-C(21)-H(21)   | 119.4    |
| C(19)-C(22)-H(22A)  | 109.5    |
| C(19)-C(22)-H(22B)  | 109.5    |

|                         |          |
|-------------------------|----------|
| H(22A) - C(22) - H(22B) | 109.5    |
| C(19) - C(22) - H(22C)  | 109.5    |
| H(22A) - C(22) - H(22C) | 109.5    |
| H(22B) - C(22) - H(22C) | 109.5    |
| N(3) - C(23) - N(4)     | 126.1(3) |
| N(3) - C(23) - C(24)    | 117.8(3) |
| N(4) - C(23) - C(24)    | 116.1(3) |
| C(27) - C(24) - C(26)   | 108.4(3) |
| C(27) - C(24) - C(23)   | 110.2(3) |
| C(26) - C(24) - C(23)   | 112.6(3) |
| C(27) - C(24) - C(25)   | 110.4(4) |
| C(26) - C(24) - C(25)   | 108.4(3) |
| C(23) - C(24) - C(25)   | 106.8(3) |
| C(24) - C(25) - H(25A)  | 109.5    |
| C(24) - C(25) - H(25B)  | 109.5    |
| H(25A) - C(25) - H(25B) | 109.5    |
| C(24) - C(25) - H(25C)  | 109.5    |
| H(25A) - C(25) - H(25C) | 109.5    |
| H(25B) - C(25) - H(25C) | 109.5    |
| C(24) - C(26) - H(26A)  | 109.5    |
| C(24) - C(26) - H(26B)  | 109.5    |
| H(26A) - C(26) - H(26B) | 109.5    |
| C(24) - C(26) - H(26C)  | 109.5    |
| H(26A) - C(26) - H(26C) | 109.5    |
| H(26B) - C(26) - H(26C) | 109.5    |
| C(24) - C(27) - H(27A)  | 109.5    |
| C(24) - C(27) - H(27B)  | 109.5    |
| H(27A) - C(27) - H(27B) | 109.5    |
| C(24) - C(27) - H(27C)  | 109.5    |
| H(27A) - C(27) - H(27C) | 109.5    |
| H(27B) - C(27) - H(27C) | 109.5    |
| C(29) - C(28) - C(33)   | 118.6(3) |
| C(29) - C(28) - N(4)    | 121.8(3) |
| C(33) - C(28) - N(4)    | 119.4(3) |
| C(28) - C(29) - C(30)   | 120.0(3) |
| C(28) - C(29) - H(29)   | 120.0    |
| C(30) - C(29) - H(29)   | 120.0    |
| C(29) - C(30) - C(31)   | 122.2(4) |
| C(29) - C(30) - H(30)   | 118.9    |
| C(31) - C(30) - H(30)   | 118.9    |
| C(32) - C(31) - C(30)   | 117.4(4) |
| C(32) - C(31) - C(34)   | 121.7(4) |
| C(30) - C(31) - C(34)   | 120.9(4) |
| C(31) - C(32) - C(33)   | 121.5(4) |
| C(31) - C(32) - H(32)   | 119.3    |
| C(33) - C(32) - H(32)   | 119.3    |
| C(32) - C(33) - C(28)   | 120.4(4) |
| C(32) - C(33) - H(33)   | 119.8    |
| C(28) - C(33) - H(33)   | 119.8    |
| C(31) - C(34) - H(34A)  | 109.5    |
| C(31) - C(34) - H(34B)  | 109.5    |
| H(34A) - C(34) - H(34B) | 109.5    |
| C(31) - C(34) - H(34C)  | 109.5    |
| H(34A) - C(34) - H(34C) | 109.5    |

|                         |          |
|-------------------------|----------|
| H(34B) - C(34) - H(34C) | 109.5    |
| C(1) - N(1) - C(11)     | 122.0(3) |
| C(1) - N(1) - H(1)      | 111(3)   |
| C(11) - N(1) - H(1)     | 119(3)   |
| C(11) - N(2) - C(16)    | 120.1(3) |
| C(23) - N(3) - C(9)     | 122.5(3) |
| C(23) - N(4) - C(28)    | 126.8(3) |
| C(23) - N(4) - H(4A)    | 115(3)   |
| C(28) - N(4) - H(4A)    | 115(3)   |

---

Symmetry transformations used to generate equivalent atoms:

Table S4. Anisotropic displacement parameters ( $\text{\AA}^2 \times 10^3$ ) for R104.  
The anisotropic displacement factor exponent takes the form:  
 $-2 \pi^2 [ h^2 a^{*2} U_{11} + \dots + 2 h k a^* b^* U_{12} ]$

|       | U11    | U22   | U33   | U23    | U13    | U12    |
|-------|--------|-------|-------|--------|--------|--------|
| C(1)  | 34(2)  | 37(2) | 32(2) | 7(2)   | 3(2)   | -3(2)  |
| C(2)  | 44(2)  | 47(2) | 39(2) | 3(2)   | 0(2)   | -6(2)  |
| C(3)  | 42(2)  | 73(3) | 46(2) | 9(2)   | -7(2)  | -18(2) |
| C(4)  | 36(2)  | 67(3) | 56(3) | 16(2)  | 0(2)   | 1(2)   |
| C(5)  | 35(2)  | 56(3) | 42(2) | 16(2)  | 6(2)   | 2(2)   |
| C(6)  | 39(2)  | 63(3) | 62(3) | 19(2)  | 9(2)   | 21(2)  |
| C(7)  | 49(3)  | 50(3) | 64(3) | 4(2)   | 19(2)  | 17(2)  |
| C(8)  | 41(2)  | 40(2) | 49(2) | 3(2)   | 12(2)  | 6(2)   |
| C(9)  | 33(2)  | 36(2) | 35(2) | 6(2)   | 8(2)   | 2(2)   |
| C(10) | 32(2)  | 37(2) | 32(2) | 11(2)  | 8(2)   | 1(2)   |
| C(11) | 38(2)  | 30(2) | 39(2) | -1(2)  | -1(2)  | 2(2)   |
| C(12) | 44(2)  | 35(2) | 38(2) | 5(2)   | 7(2)   | 4(2)   |
| C(13) | 76(3)  | 56(3) | 44(2) | 14(2)  | -3(2)  | -4(2)  |
| C(14) | 61(3)  | 41(2) | 55(3) | 15(2)  | 18(2)  | 12(2)  |
| C(15) | 54(3)  | 48(2) | 54(3) | 12(2)  | 18(2)  | 7(2)   |
| C(16) | 60(3)  | 30(2) | 31(2) | -5(2)  | 5(2)   | 5(2)   |
| C(17) | 59(3)  | 43(2) | 38(2) | -4(2)  | -1(2)  | 1(2)   |
| C(18) | 79(3)  | 50(2) | 31(2) | -1(2)  | 2(2)   | 16(3)  |
| C(19) | 83(3)  | 38(2) | 40(2) | 4(2)   | 17(2)  | 11(2)  |
| C(20) | 68(3)  | 38(2) | 53(3) | 3(2)   | 10(2)  | -4(2)  |
| C(21) | 67(3)  | 33(2) | 39(2) | -3(2)  | 1(2)   | 2(2)   |
| C(22) | 110(5) | 72(4) | 58(3) | 23(3)  | 19(3)  | 11(3)  |
| C(23) | 37(2)  | 29(2) | 30(2) | -2(2)  | 1(2)   | 2(2)   |
| C(24) | 38(2)  | 37(2) | 39(2) | -4(2)  | -9(2)  | 1(2)   |
| C(25) | 44(2)  | 48(2) | 74(3) | -16(2) | -13(2) | 8(2)   |
| C(26) | 48(2)  | 48(2) | 48(2) | -6(2)  | -11(2) | -1(2)  |
| C(27) | 71(3)  | 59(3) | 47(3) | 15(2)  | -18(2) | -5(2)  |
| C(28) | 31(2)  | 35(2) | 35(2) | 5(2)   | 2(2)   | 2(2)   |
| C(29) | 37(2)  | 32(2) | 39(2) | 7(2)   | 7(2)   | 2(2)   |
| C(30) | 42(2)  | 47(2) | 38(2) | -1(2)  | 4(2)   | 0(2)   |
| C(31) | 36(2)  | 53(2) | 41(2) | 8(2)   | 1(2)   | 4(2)   |
| C(32) | 49(2)  | 44(2) | 54(3) | 16(2)  | 0(2)   | 12(2)  |
| C(33) | 46(2)  | 32(2) | 49(2) | 1(2)   | 2(2)   | 1(2)   |
| C(34) | 61(3)  | 79(3) | 54(3) | 11(3)  | -8(2)  | 12(3)  |
| N(1)  | 40(2)  | 32(2) | 38(2) | -2(1)  | -4(1)  | 6(1)   |
| N(2)  | 56(2)  | 31(2) | 34(2) | 1(1)   | 2(2)   | 1(1)   |
| N(3)  | 36(2)  | 32(2) | 35(2) | 2(1)   | 2(1)   | 6(1)   |
| N(4)  | 40(2)  | 35(2) | 41(2) | 6(1)   | -3(2)  | -2(2)  |



## Crystal data and structure refinement of compound L<sub>1</sub>Sn

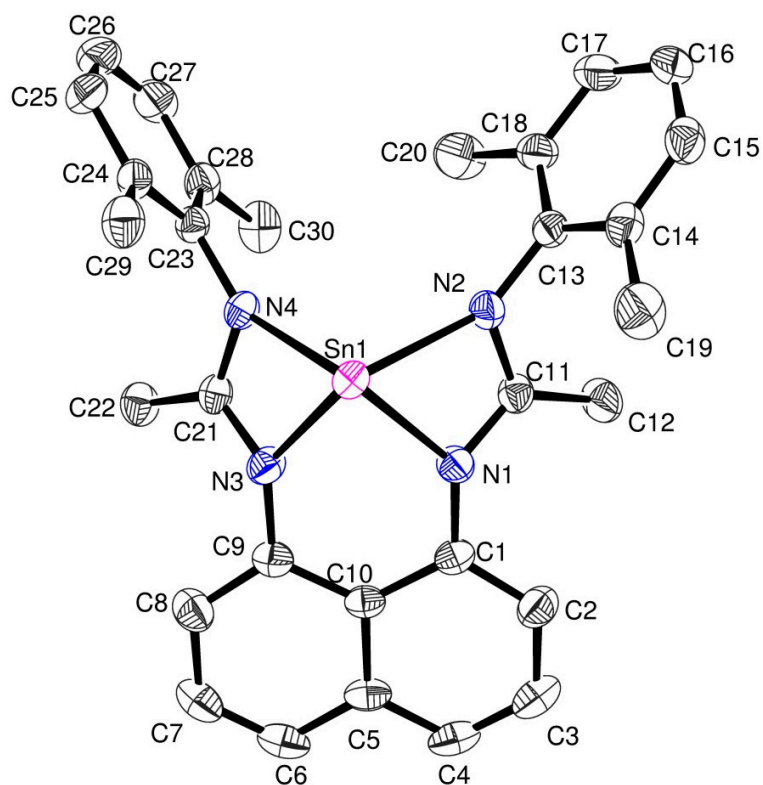

Figure S2. Asymmetric Unit

Table S5. Crystal data and structure refinement for R29.

|                             |                                                   |                        |
|-----------------------------|---------------------------------------------------|------------------------|
| Identification code         | R29                                               |                        |
| Empirical formula           | C <sub>30</sub> H <sub>30</sub> N <sub>4</sub> Sn |                        |
| Formula weight              | 565.29                                            |                        |
| Temperature                 | 193 (2) K                                         |                        |
| Wavelength                  | 0.71073 Å                                         |                        |
| Crystal system, space group | Monoclinic, C 2/c                                 |                        |
| Unit cell dimensions        | a = 20.6812 (9) Å                                 | alpha = 90 deg.        |
|                             | b = 12.6563 (5) Å                                 | beta = 96.409 (2) deg. |
|                             | c = 20.1577 (8) Å                                 | gamma = 90 deg.        |
| Volume                      | 5243.3 (4) Å <sup>3</sup>                         |                        |

|                                   |                                             |
|-----------------------------------|---------------------------------------------|
| Z, Calculated density             | 8, 1.432 Mg/m <sup>3</sup>                  |
| Absorption coefficient            | 1.000 mm <sup>-1</sup>                      |
| F(000)                            | 2304                                        |
| Crystal size                      | 0.120 x 0.100 x 0.080 mm                    |
| Theta range for data collection   | 2.677 to 35.008 deg.                        |
| Limiting indices                  | -33<=h<=33, -20<=k<=19,<br>-31<=l<=32       |
| Reflections collected / unique    | 95894 / 11564 [R(int) = 0.0699]             |
| Completeness to theta = 25.242    | 99.9 %                                      |
| Refinement method                 | Full-matrix least-squares on F <sup>2</sup> |
| Data / restraints / parameters    | 11564 / 0 / 322                             |
| Goodness-of-fit on F <sup>2</sup> | 1.029                                       |
| Final R indices [I>2sigma(I)]     | R1 = 0.0403, wR2 = 0.0747                   |
| R indices (all data)              | R1 = 0.0784, wR2 = 0.0867                   |
| Largest diff. peak and hole       | 0.588 and -0.596 e.A <sup>-3</sup>          |

Table S6. Atomic coordinates ( $\times 10^4$ ) and equivalent isotropic displacement parameters ( $\text{\AA}^2 \times 10^3$ ) for R29.  
 $U(\text{eq})$  is defined as one third of the trace of the orthogonalized  $U_{ij}$  tensor.

|       | x       | y       | z       | U(eq) |
|-------|---------|---------|---------|-------|
| Sn(1) | 7150(1) | 5482(1) | 5806(1) | 25(1) |
| N(4)  | 6571(1) | 4738(1) | 4870(1) | 26(1) |
| C(6)  | 5812(1) | 9560(2) | 5074(1) | 40(1) |
| N(2)  | 6556(1) | 4643(1) | 6572(1) | 29(1) |
| C(13) | 6597(1) | 3738(2) | 6994(1) | 28(1) |
| C(14) | 7039(1) | 3723(2) | 7579(1) | 33(1) |
| C(5)  | 5874(1) | 8979(2) | 5682(1) | 32(1) |
| N(1)  | 6434(1) | 6341(1) | 6368(1) | 29(1) |
| C(12) | 5794(1) | 5558(2) | 7243(1) | 41(1) |
| C(15) | 7088(1) | 2815(2) | 7967(1) | 38(1) |
| C(7)  | 5987(1) | 9129(2) | 4508(1) | 43(1) |
| C(22) | 5955(1) | 5806(2) | 3973(1) | 36(1) |
| N(3)  | 6518(1) | 6438(1) | 5071(1) | 30(1) |
| C(4)  | 5690(1) | 9446(2) | 6268(1) | 40(1) |
| C(16) | 6706(1) | 1946(2) | 7796(1) | 43(1) |
| C(10) | 6121(1) | 7917(2) | 5698(1) | 26(1) |
| C(25) | 7039(1) | 2465(2) | 3872(1) | 42(1) |
| C(18) | 6225(1) | 2845(2) | 6807(1) | 34(1) |
| C(24) | 7087(1) | 3392(2) | 4248(1) | 31(1) |
| C(9)  | 6281(1) | 7478(2) | 5077(1) | 29(1) |
| C(21) | 6347(1) | 5667(2) | 4640(1) | 27(1) |
| C(19) | 7462(1) | 4663(2) | 7776(1) | 52(1) |
| C(29) | 7736(1) | 3935(2) | 4402(1) | 40(1) |
| C(11) | 6272(1) | 5533(2) | 6734(1) | 29(1) |
| C(17) | 6282(1) | 1959(2) | 7220(1) | 43(1) |
| C(8)  | 6228(1) | 8093(2) | 4507(1) | 38(1) |
| C(3)  | 5764(1) | 8922(2) | 6856(1) | 46(1) |
| C(28) | 5926(1) | 3267(2) | 4352(1) | 33(1) |
| C(26) | 6453(2) | 1946(2) | 3740(1) | 48(1) |
| C(2)  | 6022(1) | 7892(2) | 6893(1) | 38(1) |
| C(23) | 6524(1) | 3800(2) | 4482(1) | 26(1) |
| C(1)  | 6179(1) | 7367(2) | 6331(1) | 28(1) |
| C(27) | 5905(1) | 2334(2) | 3978(1) | 43(1) |
| C(20) | 5777(1) | 2848(2) | 6164(1) | 52(1) |
| C(30) | 5309(1) | 3669(2) | 4599(1) | 43(1) |

Table S7. Bond lengths [Å] and angles [deg] for R29.

---

|              |            |
|--------------|------------|
| Sn(1)-N(3)   | 2.2232(17) |
| Sn(1)-N(1)   | 2.2435(17) |
| Sn(1)-N(4)   | 2.3181(16) |
| Sn(1)-N(2)   | 2.3327(17) |
| N(4)-C(21)   | 1.329(3)   |
| N(4)-C(23)   | 1.420(2)   |
| C(6)-C(7)    | 1.350(4)   |
| C(6)-C(5)    | 1.422(3)   |
| C(6)-H(6)    | 0.9500     |
| N(2)-C(11)   | 1.328(3)   |
| N(2)-C(13)   | 1.423(3)   |
| C(13)-C(18)  | 1.395(3)   |
| C(13)-C(14)  | 1.409(3)   |
| C(14)-C(15)  | 1.387(3)   |
| C(14)-C(19)  | 1.505(3)   |
| C(5)-C(4)    | 1.410(3)   |
| C(5)-C(10)   | 1.437(3)   |
| N(1)-C(11)   | 1.326(3)   |
| N(1)-C(1)    | 1.400(3)   |
| C(12)-C(11)  | 1.503(3)   |
| C(12)-H(12A) | 0.9800     |
| C(12)-H(12B) | 0.9800     |
| C(12)-H(12C) | 0.9800     |
| C(15)-C(16)  | 1.375(4)   |
| C(15)-H(15)  | 0.9500     |
| C(7)-C(8)    | 1.403(3)   |
| C(7)-H(7)    | 0.9500     |
| C(22)-C(21)  | 1.500(3)   |
| C(22)-H(22A) | 0.9800     |
| C(22)-H(22B) | 0.9800     |
| C(22)-H(22C) | 0.9800     |
| N(3)-C(21)   | 1.328(3)   |
| N(3)-C(9)    | 1.405(3)   |
| C(4)-C(3)    | 1.352(4)   |
| C(4)-H(4)    | 0.9500     |
| C(16)-C(17)  | 1.375(4)   |
| C(16)-H(16)  | 0.9500     |
| C(10)-C(9)   | 1.442(3)   |
| C(10)-C(1)   | 1.447(3)   |
| C(25)-C(26)  | 1.379(4)   |
| C(25)-C(24)  | 1.394(3)   |
| C(25)-H(25)  | 0.9500     |
| C(18)-C(17)  | 1.392(3)   |
| C(18)-C(20)  | 1.507(3)   |
| C(24)-C(23)  | 1.404(3)   |
| C(24)-C(29)  | 1.509(3)   |
| C(9)-C(8)    | 1.380(3)   |
| C(19)-H(19A) | 0.9800     |
| C(19)-H(19B) | 0.9800     |
| C(19)-H(19C) | 0.9800     |
| C(29)-H(29A) | 0.9800     |

|                     |            |
|---------------------|------------|
| C(29)-H(29B)        | 0.9800     |
| C(29)-H(29C)        | 0.9800     |
| C(17)-H(17)         | 0.9500     |
| C(8)-H(8)           | 0.9500     |
| C(3)-C(2)           | 1.408(3)   |
| C(3)-H(3)           | 0.9500     |
| C(28)-C(27)         | 1.399(3)   |
| C(28)-C(23)         | 1.406(3)   |
| C(28)-C(30)         | 1.509(3)   |
| C(26)-C(27)         | 1.369(4)   |
| C(26)-H(26)         | 0.9500     |
| C(2)-C(1)           | 1.383(3)   |
| C(2)-H(2)           | 0.9500     |
| C(27)-H(27)         | 0.9500     |
| C(20)-H(20A)        | 0.9800     |
| C(20)-H(20B)        | 0.9800     |
| C(20)-H(20C)        | 0.9800     |
| C(30)-H(30A)        | 0.9800     |
| C(30)-H(30B)        | 0.9800     |
| C(30)-H(30C)        | 0.9800     |
|                     |            |
| N(3)-Sn(1)-N(1)     | 72.57(6)   |
| N(3)-Sn(1)-N(4)     | 57.74(6)   |
| N(1)-Sn(1)-N(4)     | 107.35(6)  |
| N(3)-Sn(1)-N(2)     | 112.07(6)  |
| N(1)-Sn(1)-N(2)     | 57.38(6)   |
| N(4)-Sn(1)-N(2)     | 95.29(6)   |
| C(21)-N(4)-C(23)    | 123.17(17) |
| C(21)-N(4)-Sn(1)    | 93.11(12)  |
| C(23)-N(4)-Sn(1)    | 141.84(13) |
| C(7)-C(6)-C(5)      | 120.8(2)   |
| C(7)-C(6)-H(6)      | 119.6      |
| C(5)-C(6)-H(6)      | 119.6      |
| C(11)-N(2)-C(13)    | 122.30(17) |
| C(11)-N(2)-Sn(1)    | 93.22(12)  |
| C(13)-N(2)-Sn(1)    | 139.58(13) |
| C(18)-C(13)-C(14)   | 120.13(19) |
| C(18)-C(13)-N(2)    | 119.73(18) |
| C(14)-C(13)-N(2)    | 120.04(19) |
| C(15)-C(14)-C(13)   | 118.9(2)   |
| C(15)-C(14)-C(19)   | 120.2(2)   |
| C(13)-C(14)-C(19)   | 120.9(2)   |
| C(4)-C(5)-C(6)      | 119.9(2)   |
| C(4)-C(5)-C(10)     | 120.1(2)   |
| C(6)-C(5)-C(10)     | 120.0(2)   |
| C(11)-N(1)-C(1)     | 128.94(17) |
| C(11)-N(1)-Sn(1)    | 97.36(12)  |
| C(1)-N(1)-Sn(1)     | 133.51(13) |
| C(11)-C(12)-H(12A)  | 109.5      |
| C(11)-C(12)-H(12B)  | 109.5      |
| H(12A)-C(12)-H(12B) | 109.5      |
| C(11)-C(12)-H(12C)  | 109.5      |
| H(12A)-C(12)-H(12C) | 109.5      |
| H(12B)-C(12)-H(12C) | 109.5      |

|                     |            |
|---------------------|------------|
| C(16)-C(15)-C(14)   | 121.1(2)   |
| C(16)-C(15)-H(15)   | 119.4      |
| C(14)-C(15)-H(15)   | 119.4      |
| C(6)-C(7)-C(8)      | 120.5(2)   |
| C(6)-C(7)-H(7)      | 119.8      |
| C(8)-C(7)-H(7)      | 119.8      |
| C(21)-C(22)-H(22A)  | 109.5      |
| C(21)-C(22)-H(22B)  | 109.5      |
| H(22A)-C(22)-H(22B) | 109.5      |
| C(21)-C(22)-H(22C)  | 109.5      |
| H(22A)-C(22)-H(22C) | 109.5      |
| H(22B)-C(22)-H(22C) | 109.5      |
| C(21)-N(3)-C(9)     | 128.79(18) |
| C(21)-N(3)-Sn(1)    | 97.47(13)  |
| C(9)-N(3)-Sn(1)     | 133.17(14) |
| C(3)-C(4)-C(5)      | 120.9(2)   |
| C(3)-C(4)-H(4)      | 119.5      |
| C(5)-C(4)-H(4)      | 119.5      |
| C(17)-C(16)-C(15)   | 119.8(2)   |
| C(17)-C(16)-H(16)   | 120.1      |
| C(15)-C(16)-H(16)   | 120.1      |
| C(5)-C(10)-C(9)     | 117.16(19) |
| C(5)-C(10)-C(1)     | 117.60(19) |
| C(9)-C(10)-C(1)     | 125.23(18) |
| C(26)-C(25)-C(24)   | 120.9(2)   |
| C(26)-C(25)-H(25)   | 119.6      |
| C(24)-C(25)-H(25)   | 119.6      |
| C(17)-C(18)-C(13)   | 118.9(2)   |
| C(17)-C(18)-C(20)   | 121.3(2)   |
| C(13)-C(18)-C(20)   | 119.9(2)   |
| C(25)-C(24)-C(23)   | 118.7(2)   |
| C(25)-C(24)-C(29)   | 120.2(2)   |
| C(23)-C(24)-C(29)   | 121.06(19) |
| C(8)-C(9)-N(3)      | 121.1(2)   |
| C(8)-C(9)-C(10)     | 120.02(19) |
| N(3)-C(9)-C(10)     | 118.82(18) |
| N(3)-C(21)-N(4)     | 111.37(17) |
| N(3)-C(21)-C(22)    | 125.31(19) |
| N(4)-C(21)-C(22)    | 123.32(19) |
| C(14)-C(19)-H(19A)  | 109.5      |
| C(14)-C(19)-H(19B)  | 109.5      |
| H(19A)-C(19)-H(19B) | 109.5      |
| C(14)-C(19)-H(19C)  | 109.5      |
| H(19A)-C(19)-H(19C) | 109.5      |
| H(19B)-C(19)-H(19C) | 109.5      |
| C(24)-C(29)-H(29A)  | 109.5      |
| C(24)-C(29)-H(29B)  | 109.5      |
| H(29A)-C(29)-H(29B) | 109.5      |
| C(24)-C(29)-H(29C)  | 109.5      |
| H(29A)-C(29)-H(29C) | 109.5      |
| H(29B)-C(29)-H(29C) | 109.5      |
| N(1)-C(11)-N(2)     | 111.85(17) |
| N(1)-C(11)-C(12)    | 126.14(19) |
| N(2)-C(11)-C(12)    | 121.89(19) |

|                     |             |
|---------------------|-------------|
| C(16)-C(17)-C(18)   | 121.2 (2)   |
| C(16)-C(17)-H(17)   | 119.4       |
| C(18)-C(17)-H(17)   | 119.4       |
| C(9)-C(8)-C(7)      | 121.4 (2)   |
| C(9)-C(8)-H(8)      | 119.3       |
| C(7)-C(8)-H(8)      | 119.3       |
| C(4)-C(3)-C(2)      | 120.4 (2)   |
| C(4)-C(3)-H(3)      | 119.8       |
| C(2)-C(3)-H(3)      | 119.8       |
| C(27)-C(28)-C(23)   | 118.6 (2)   |
| C(27)-C(28)-C(30)   | 119.1 (2)   |
| C(23)-C(28)-C(30)   | 122.3 (2)   |
| C(27)-C(26)-C(25)   | 120.4 (2)   |
| C(27)-C(26)-H(26)   | 119.8       |
| C(25)-C(26)-H(26)   | 119.8       |
| C(1)-C(2)-C(3)      | 121.5 (2)   |
| C(1)-C(2)-H(2)      | 119.2       |
| C(3)-C(2)-H(2)      | 119.2       |
| C(24)-C(23)-C(28)   | 120.44 (19) |
| C(24)-C(23)-N(4)    | 118.90 (18) |
| C(28)-C(23)-N(4)    | 120.63 (18) |
| C(2)-C(1)-N(1)      | 121.5 (2)   |
| C(2)-C(1)-C(10)     | 119.24 (19) |
| N(1)-C(1)-C(10)     | 119.12 (18) |
| C(26)-C(27)-C(28)   | 120.9 (2)   |
| C(26)-C(27)-H(27)   | 119.5       |
| C(28)-C(27)-H(27)   | 119.5       |
| C(18)-C(20)-H(20A)  | 109.5       |
| C(18)-C(20)-H(20B)  | 109.5       |
| H(20A)-C(20)-H(20B) | 109.5       |
| C(18)-C(20)-H(20C)  | 109.5       |
| H(20A)-C(20)-H(20C) | 109.5       |
| H(20B)-C(20)-H(20C) | 109.5       |
| C(28)-C(30)-H(30A)  | 109.5       |
| C(28)-C(30)-H(30B)  | 109.5       |
| H(30A)-C(30)-H(30B) | 109.5       |
| C(28)-C(30)-H(30C)  | 109.5       |
| H(30A)-C(30)-H(30C) | 109.5       |
| H(30B)-C(30)-H(30C) | 109.5       |

---

Symmetry transformations used to generate equivalent atoms:

Table S8. Anisotropic displacement parameters ( $\text{\AA}^2 \times 10^3$ ) for R29.  
The anisotropic displacement factor exponent takes the form:  
 $-2 \pi^2 [ h^2 a^{*2} U_{11} + \dots + 2 h k a^* b^* U_{12} ]$

|       | U11   | U22   | U33   | U23    | U13    | U12    |
|-------|-------|-------|-------|--------|--------|--------|
| Sn(1) | 20(1) | 28(1) | 26(1) | -4(1)  | 1(1)   | -1(1)  |
| N(4)  | 24(1) | 30(1) | 24(1) | -4(1)  | 1(1)   | 0(1)   |
| C(6)  | 33(1) | 25(1) | 61(2) | 9(1)   | 2(1)   | 1(1)   |
| N(2)  | 32(1) | 30(1) | 27(1) | 2(1)   | 7(1)   | 2(1)   |
| C(13) | 29(1) | 28(1) | 27(1) | 1(1)   | 7(1)   | 5(1)   |
| C(14) | 32(1) | 40(1) | 29(1) | -2(1)  | 6(1)   | 3(1)   |
| C(5)  | 25(1) | 23(1) | 47(1) | -3(1)  | 0(1)   | -2(1)  |
| N(1)  | 28(1) | 28(1) | 30(1) | 2(1)   | 6(1)   | 3(1)   |
| C(12) | 43(1) | 42(1) | 43(1) | 8(1)   | 22(1)  | 10(1)  |
| C(15) | 40(1) | 46(1) | 29(1) | 2(1)   | 1(1)   | 13(1)  |
| C(7)  | 41(1) | 38(1) | 51(2) | 17(1)  | 7(1)   | 1(1)   |
| C(22) | 35(1) | 42(1) | 29(1) | 2(1)   | -2(1)  | 2(1)   |
| N(3)  | 32(1) | 30(1) | 29(1) | -4(1)  | 1(1)   | 5(1)   |
| C(4)  | 38(1) | 26(1) | 56(1) | -12(1) | -2(1)  | 4(1)   |
| C(16) | 60(2) | 33(1) | 37(1) | 7(1)   | 8(1)   | 16(1)  |
| C(10) | 21(1) | 23(1) | 35(1) | -2(1)  | 2(1)   | -4(1)  |
| C(25) | 57(2) | 36(1) | 35(1) | -5(1)  | 10(1)  | 13(1)  |
| C(18) | 38(1) | 28(1) | 35(1) | 0(1)   | 0(1)   | 2(1)   |
| C(24) | 36(1) | 33(1) | 25(1) | 2(1)   | 6(1)   | 4(1)   |
| C(9)  | 24(1) | 27(1) | 37(1) | 1(1)   | 4(1)   | -1(1)  |
| C(21) | 22(1) | 34(1) | 26(1) | -2(1)  | 5(1)   | 2(1)   |
| C(19) | 50(2) | 59(2) | 43(1) | 0(1)   | -9(1)  | -14(1) |
| C(29) | 32(1) | 51(2) | 39(1) | 0(1)   | 11(1)  | 2(1)   |
| C(11) | 27(1) | 32(1) | 27(1) | 1(1)   | 5(1)   | 4(1)   |
| C(17) | 58(2) | 26(1) | 45(1) | 0(1)   | 0(1)   | 0(1)   |
| C(8)  | 37(1) | 39(1) | 40(1) | 8(1)   | 10(1)  | 2(1)   |
| C(3)  | 48(1) | 41(1) | 48(1) | -19(1) | 3(1)   | 3(1)   |
| C(28) | 35(1) | 38(1) | 25(1) | -1(1)  | 0(1)   | -10(1) |
| C(26) | 77(2) | 32(1) | 33(1) | -6(1)  | -2(1)  | -1(1)  |
| C(2)  | 43(1) | 37(1) | 33(1) | -7(1)  | 1(1)   | 2(1)   |
| C(23) | 27(1) | 28(1) | 22(1) | -1(1)  | 1(1)   | -1(1)  |
| C(1)  | 24(1) | 27(1) | 33(1) | -4(1)  | 0(1)   | -1(1)  |
| C(27) | 55(2) | 37(1) | 35(1) | -2(1)  | -6(1)  | -16(1) |
| C(20) | 56(2) | 45(1) | 50(2) | 1(1)   | -16(1) | -6(1)  |
| C(30) | 27(1) | 61(2) | 41(1) | -1(1)  | 1(1)   | -8(1)  |



Crystal data and structure refinement of compound (L<sub>2</sub>Sn)<sub>2</sub>

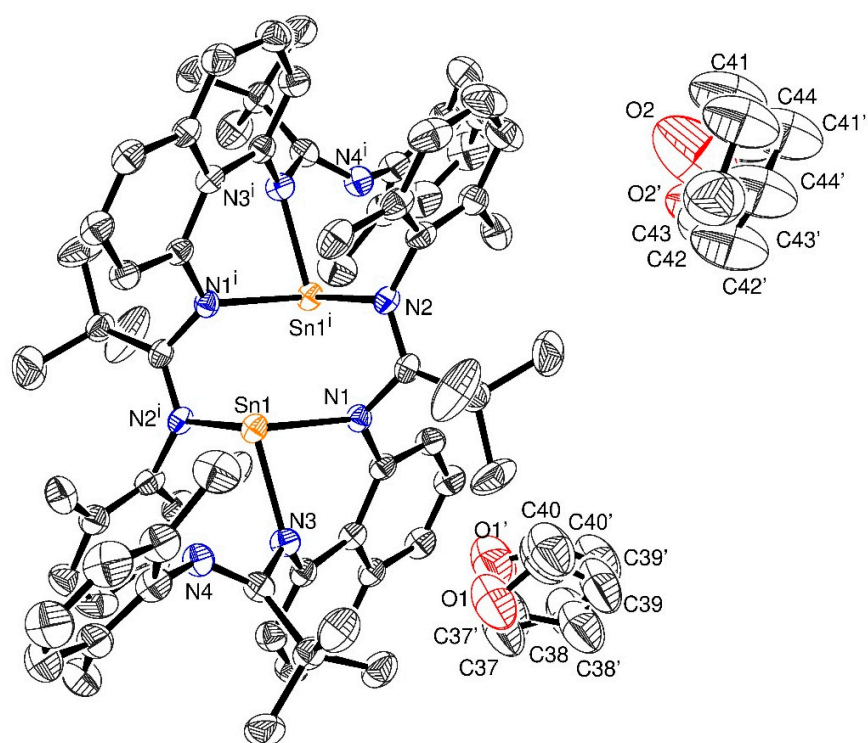

Figure S3. Asymmetric Unit (Symmetry code (i) : 2-x,1-y,1-z)

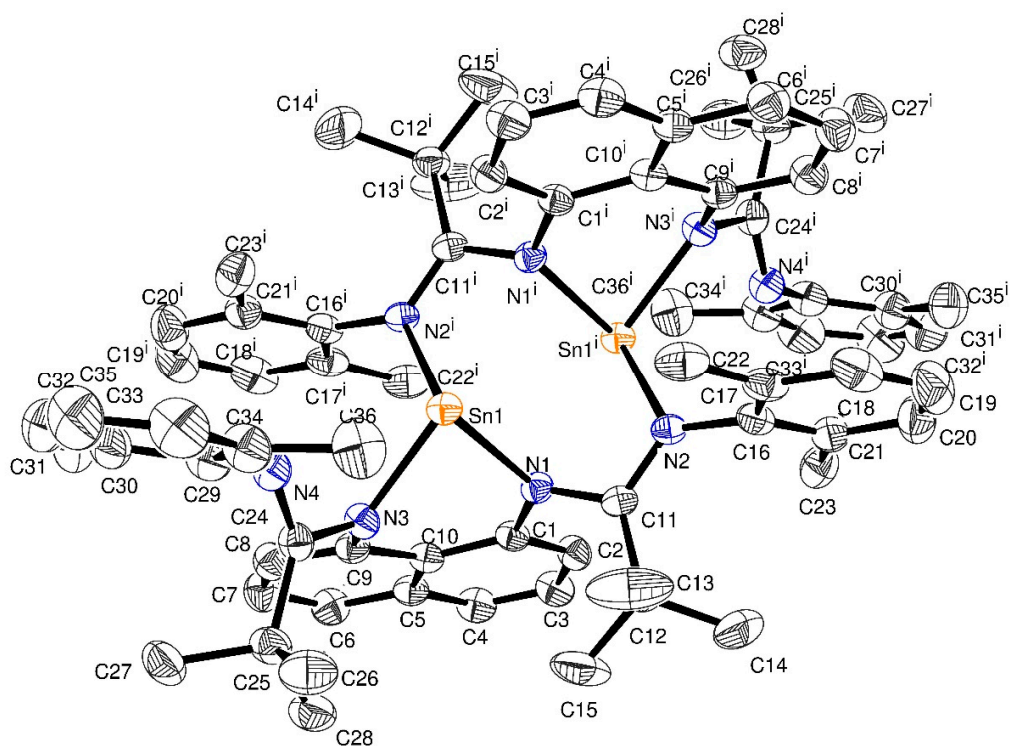

Figure S4. Compound

Table S9. Crystal data and structure refinement for R102.

|                             |                                                                                                                                             |  |
|-----------------------------|---------------------------------------------------------------------------------------------------------------------------------------------|--|
| Identification code         | R102                                                                                                                                        |  |
| Empirical formula           | C <sub>72</sub> H <sub>84</sub> N <sub>8</sub> Sn <sub>2</sub> , 4(C <sub>4</sub> H <sub>8</sub> O)                                         |  |
| Formula weight              | 1587.31                                                                                                                                     |  |
| Temperature                 | 193 (2) K                                                                                                                                   |  |
| Wavelength                  | 0.71073 Å                                                                                                                                   |  |
| Crystal system, space group | Triclinic, P -1                                                                                                                             |  |
| Unit cell dimensions        | a = 11.2468 (7) Å    alpha = 86.510 (2) deg.<br>b = 12.6512 (7) Å    beta = 78.588 (2) deg.<br>c = 14.5050 (9) Å    gamma = 79.579 (2) deg. |  |
| Volume                      | 1989.0 (2) Å <sup>3</sup>                                                                                                                   |  |
| Z, Calculated density       | 1, 1.325 Mg/m <sup>3</sup>                                                                                                                  |  |
| Absorption coefficient      | 0.683 mm <sup>-1</sup>                                                                                                                      |  |

|                                   |                                             |
|-----------------------------------|---------------------------------------------|
| F(000)                            | 832                                         |
| Crystal size                      | 0.080 x 0.060 x 0.040 mm                    |
| Theta range for data collection   | 3.327 to 29.622 deg.                        |
| Limiting indices                  | -15<=h<=15, -17<=k<=17,<br>-20<=l<=20       |
| Reflections collected / unique    | 75976 / 11128 [R(int) = 0.0936]             |
| Completeness to theta = 25.242    | 99.4 %                                      |
| Refinement method                 | Full-matrix least-squares on F <sup>2</sup> |
| Data / restraints / parameters    | 11128 / 277 / 564                           |
| Goodness-of-fit on F <sup>2</sup> | 1.015                                       |
| Final R indices [I>2sigma(I)]     | R1 = 0.0461, wR2 = 0.1054                   |
| R indices (all data)              | R1 = 0.0747, wR2 = 0.1209                   |
| Extinction coefficient            | 0.0126(10)                                  |
| Largest diff. peak and hole       | 1.132 and -0.909 e.A <sup>-3</sup>          |

Table S10. Atomic coordinates ( $\times 10^4$ ) and equivalent isotropic displacement parameters ( $\text{\AA}^2 \times 10^3$ ) for R102.  
 $U(\text{eq})$  is defined as one third of the trace of the orthogonalized  $U_{ij}$  tensor.

|        | x        | y        | z        | U(eq)  |
|--------|----------|----------|----------|--------|
| C(1)   | 7596(3)  | 5785(2)  | 4640(2)  | 25(1)  |
| C(2)   | 7495(3)  | 5731(3)  | 3707(2)  | 31(1)  |
| C(3)   | 6786(3)  | 6554(3)  | 3259(2)  | 35(1)  |
| C(4)   | 6215(3)  | 7465(3)  | 3729(2)  | 34(1)  |
| C(5)   | 6292(3)  | 7571(3)  | 4678(2)  | 28(1)  |
| C(6)   | 5712(3)  | 8527(3)  | 5142(3)  | 36(1)  |
| C(7)   | 5787(3)  | 8659(3)  | 6059(3)  | 39(1)  |
| C(8)   | 6402(3)  | 7829(3)  | 6555(2)  | 34(1)  |
| C(9)   | 6931(3)  | 6843(2)  | 6151(2)  | 27(1)  |
| C(10)  | 6958(3)  | 6705(2)  | 5169(2)  | 25(1)  |
| C(11)  | 8587(3)  | 3925(2)  | 4711(2)  | 24(1)  |
| C(12)  | 7481(3)  | 3306(3)  | 4982(2)  | 32(1)  |
| C(13)  | 7679(4)  | 2623(5)  | 5846(4)  | 80(2)  |
| C(14)  | 7341(4)  | 2573(5)  | 4212(4)  | 79(2)  |
| C(15)  | 6253(3)  | 4048(3)  | 5221(4)  | 65(1)  |
| C(16)  | 10183(3) | 2413(2)  | 4079(2)  | 30(1)  |
| C(17)  | 10704(3) | 1681(3)  | 4708(3)  | 35(1)  |
| C(18)  | 11205(3) | 642(3)   | 4407(3)  | 48(1)  |
| C(19)  | 11215(4) | 349(3)   | 3503(3)  | 56(1)  |
| C(20)  | 10720(4) | 1087(3)  | 2882(3)  | 47(1)  |
| C(21)  | 10205(3) | 2130(3)  | 3149(2)  | 35(1)  |
| C(22)  | 10750(3) | 1953(3)  | 5701(3)  | 42(1)  |
| C(23)  | 9669(4)  | 2923(3)  | 2451(2)  | 42(1)  |
| C(24)  | 7082(3)  | 5931(3)  | 7667(2)  | 29(1)  |
| C(25)  | 5716(3)  | 5845(3)  | 8102(2)  | 35(1)  |
| C(26)  | 5707(4)  | 4703(3)  | 8496(3)  | 53(1)  |
| C(27)  | 5164(4)  | 6631(4)  | 8912(3)  | 49(1)  |
| C(28)  | 4837(3)  | 6045(4)  | 7398(3)  | 45(1)  |
| C(29)  | 8024(3)  | 5543(3)  | 9082(2)  | 36(1)  |
| C(30)  | 7876(3)  | 6404(3)  | 9679(2)  | 40(1)  |
| C(31)  | 8031(4)  | 6178(4)  | 10607(3) | 51(1)  |
| C(32)  | 8340(4)  | 5144(4)  | 10931(3) | 61(1)  |
| C(33)  | 8536(4)  | 4304(4)  | 10327(3) | 55(1)  |
| C(34)  | 8402(3)  | 4493(3)  | 9383(2)  | 42(1)  |
| C(35)  | 7613(4)  | 7554(3)  | 9352(3)  | 49(1)  |
| C(36)  | 8753(4)  | 3560(3)  | 8711(3)  | 54(1)  |
| O(1)   | 4578(11) | 9100(6)  | 2166(8)  | 109(2) |
| C(37)  | 4034(16) | 9949(9)  | 1700(12) | 105(3) |
| C(38)  | 3512(15) | 9554(9)  | 922(11)  | 110(3) |
| C(39)  | 3615(14) | 8390(9)  | 1182(10) | 109(3) |
| C(40)  | 4680(20) | 8175(9)  | 1660(20) | 112(3) |
| O(1')  | 5176(17) | 8998(13) | 1611(15) | 113(3) |
| C(37') | 4250(20) | 9830(16) | 1450(20) | 111(3) |
| C(38') | 3190(20) | 9323(18) | 1210(20) | 111(3) |

|        |          |          |          |        |
|--------|----------|----------|----------|--------|
| C(39') | 4020(20) | 8359(17) | 810(18)  | 109(3) |
| C(40') | 4720(40) | 8043(15) | 1570(40) | 110(3) |
| C(43)  | 7733(10) | 41(8)    | 2503(7)  | 117(3) |
| C(42)  | 7580(11) | 919(8)   | 1851(10) | 121(4) |
| O(2)   | 8651(14) | 719(8)   | 1069(7)  | 203(5) |
| C(41)  | 9022(13) | -427(9)  | 1098(8)  | 146(4) |
| C(44)  | 8468(11) | -823(8)  | 1925(8)  | 135(4) |
| C(43') | 7380(60) | -270(30) | 2190(30) | 140(5) |
| C(42') | 7010(60) | 830(30)  | 2100(40) | 140(6) |
| O(2')  | 7840(50) | 1200(30) | 1290(30) | 142(6) |
| C(41') | 8420(60) | 220(40)  | 780(30)  | 143(5) |
| C(44') | 7930(60) | -620(30) | 1250(40) | 141(5) |
| N(1)   | 8441(2)  | 4967(2)  | 4998(2)  | 24(1)  |
| N(2)   | 9719(2)  | 3514(2)  | 4329(2)  | 25(1)  |
| N(3)   | 7461(2)  | 6003(2)  | 6691(2)  | 27(1)  |
| N(4)   | 7988(3)  | 5748(2)  | 8112(2)  | 31(1)  |
| Sn(1)  | 9263(1)  | 5074(1)  | 6270(1)  | 25(1)  |

---

Table S11. Bond lengths [Å] and angles [deg] for R102.

---

|              |          |
|--------------|----------|
| C(1)-C(2)    | 1.387(4) |
| C(1)-N(1)    | 1.421(4) |
| C(1)-C(10)   | 1.431(4) |
| C(2)-C(3)    | 1.401(4) |
| C(2)-H(2)    | 0.9500   |
| C(3)-C(4)    | 1.364(5) |
| C(3)-H(3)    | 0.9500   |
| C(4)-C(5)    | 1.412(4) |
| C(4)-H(4)    | 0.9500   |
| C(5)-C(6)    | 1.408(5) |
| C(5)-C(10)   | 1.444(4) |
| C(6)-C(7)    | 1.371(5) |
| C(6)-H(6)    | 0.9500   |
| C(7)-C(8)    | 1.394(5) |
| C(7)-H(7)    | 0.9500   |
| C(8)-C(9)    | 1.391(5) |
| C(8)-H(8)    | 0.9500   |
| C(9)-N(3)    | 1.397(4) |
| C(9)-C(10)   | 1.440(4) |
| C(11)-N(2)   | 1.309(4) |
| C(11)-N(1)   | 1.378(4) |
| C(11)-C(12)  | 1.561(4) |
| C(12)-C(13)  | 1.508(5) |
| C(12)-C(15)  | 1.513(5) |
| C(12)-C(14)  | 1.543(6) |
| C(13)-H(13A) | 0.9800   |
| C(13)-H(13B) | 0.9800   |
| C(13)-H(13C) | 0.9800   |
| C(14)-H(14A) | 0.9800   |
| C(14)-H(14B) | 0.9800   |
| C(14)-H(14C) | 0.9800   |
| C(15)-H(15A) | 0.9800   |
| C(15)-H(15B) | 0.9800   |
| C(15)-H(15C) | 0.9800   |
| C(16)-C(17)  | 1.395(4) |
| C(16)-C(21)  | 1.410(5) |
| C(16)-N(2)   | 1.438(4) |
| C(17)-C(18)  | 1.393(5) |
| C(17)-C(22)  | 1.515(5) |
| C(18)-C(19)  | 1.381(6) |
| C(18)-H(18)  | 0.9500   |
| C(19)-C(20)  | 1.379(6) |
| C(19)-H(19)  | 0.9500   |
| C(20)-C(21)  | 1.386(5) |
| C(20)-H(20)  | 0.9500   |
| C(21)-C(23)  | 1.515(5) |
| C(22)-H(22A) | 0.9800   |
| C(22)-H(22B) | 0.9800   |
| C(22)-H(22C) | 0.9800   |
| C(23)-H(23A) | 0.9800   |
| C(23)-H(23B) | 0.9800   |

|                |           |
|----------------|-----------|
| C(23) -H(23C)  | 0.9800    |
| C(24) -N(4)    | 1.291(4)  |
| C(24) -N(3)    | 1.398(4)  |
| C(24) -C(25)   | 1.562(4)  |
| C(25) -C(26)   | 1.522(5)  |
| C(25) -C(28)   | 1.538(5)  |
| C(25) -C(27)   | 1.544(5)  |
| C(26) -H(26A)  | 0.9800    |
| C(26) -H(26B)  | 0.9800    |
| C(26) -H(26C)  | 0.9800    |
| C(27) -H(27A)  | 0.9800    |
| C(27) -H(27B)  | 0.9800    |
| C(27) -H(27C)  | 0.9800    |
| C(28) -H(28A)  | 0.9800    |
| C(28) -H(28B)  | 0.9800    |
| C(28) -H(28C)  | 0.9800    |
| C(29) -C(34)   | 1.391(5)  |
| C(29) -C(30)   | 1.398(5)  |
| C(29) -N(4)    | 1.422(4)  |
| C(30) -C(31)   | 1.397(5)  |
| C(30) -C(35)   | 1.498(5)  |
| C(31) -C(32)   | 1.370(6)  |
| C(31) -H(31)   | 0.9500    |
| C(32) -C(33)   | 1.377(6)  |
| C(32) -H(32)   | 0.9500    |
| C(33) -C(34)   | 1.408(5)  |
| C(33) -H(33)   | 0.9500    |
| C(34) -C(36)   | 1.523(6)  |
| C(35) -H(35A)  | 0.9800    |
| C(35) -H(35B)  | 0.9800    |
| C(35) -H(35C)  | 0.9800    |
| C(36) -H(36A)  | 0.9800    |
| C(36) -H(36B)  | 0.9800    |
| C(36) -H(36C)  | 0.9800    |
| O(1) -C(37)    | 1.349(11) |
| O(1) -C(40)    | 1.395(14) |
| C(37) -C(38)   | 1.519(13) |
| C(37) -H(37A)  | 0.9900    |
| C(37) -H(37B)  | 0.9900    |
| C(38) -C(39)   | 1.486(14) |
| C(38) -H(38A)  | 0.9900    |
| C(38) -H(38B)  | 0.9900    |
| C(39) -C(40)   | 1.470(13) |
| C(39) -H(39A)  | 0.9900    |
| C(39) -H(39B)  | 0.9900    |
| C(40) -H(40A)  | 0.9900    |
| C(40) -H(40B)  | 0.9900    |
| O(1') -C(37')  | 1.385(15) |
| O(1') -C(40')  | 1.41(2)   |
| C(37') -C(38') | 1.557(18) |
| C(37') -H(37C) | 0.9900    |
| C(37') -H(37D) | 0.9900    |
| C(38') -C(39') | 1.469(18) |
| C(38') -H(38C) | 0.9900    |

|                   |           |
|-------------------|-----------|
| C(38') -H(38D)    | 0.9900    |
| C(39') -C(40')    | 1.466(18) |
| C(39') -H(39C)    | 0.9900    |
| C(39') -H(39D)    | 0.9900    |
| C(40') -H(40C)    | 0.9900    |
| C(40') -H(40D)    | 0.9900    |
| C(43) -C(42)      | 1.423(12) |
| C(43) -C(44)      | 1.446(13) |
| C(43) -H(43A)     | 0.9900    |
| C(43) -H(43B)     | 0.9900    |
| C(42) -O(2)       | 1.478(12) |
| C(42) -H(42A)     | 0.9900    |
| C(42) -H(42B)     | 0.9900    |
| O(2) -C(41)       | 1.435(12) |
| C(41) -C(44)      | 1.350(12) |
| C(41) -H(41A)     | 0.9900    |
| C(41) -H(41B)     | 0.9900    |
| C(44) -H(44A)     | 0.9900    |
| C(44) -H(44B)     | 0.9900    |
| C(43') -C(42')    | 1.389(18) |
| C(43') -C(44')    | 1.44(2)   |
| C(43') -H(43C)    | 0.9900    |
| C(43') -H(43D)    | 0.9900    |
| C(42') -O(2')     | 1.454(19) |
| C(42') -H(42C)    | 0.9900    |
| C(42') -H(42D)    | 0.9900    |
| O(2') -C(41')     | 1.464(18) |
| C(41') -C(44')    | 1.374(18) |
| C(41') -H(41C)    | 0.9900    |
| C(41') -H(41D)    | 0.9900    |
| C(44') -H(44C)    | 0.9900    |
| C(44') -H(44D)    | 0.9900    |
| N(1) -Sn(1)       | 2.243(2)  |
| N(2) -Sn(1) #1    | 2.327(2)  |
| N(3) -Sn(1)       | 2.144(3)  |
|                   |           |
| C(2) -C(1) -N(1)  | 117.6(3)  |
| C(2) -C(1) -C(10) | 119.5(3)  |
| N(1) -C(1) -C(10) | 122.6(3)  |
| C(1) -C(2) -C(3)  | 122.1(3)  |
| C(1) -C(2) -H(2)  | 119.0     |
| C(3) -C(2) -H(2)  | 119.0     |
| C(4) -C(3) -C(2)  | 119.9(3)  |
| C(4) -C(3) -H(3)  | 120.0     |
| C(2) -C(3) -H(3)  | 120.0     |
| C(3) -C(4) -C(5)  | 120.5(3)  |
| C(3) -C(4) -H(4)  | 119.7     |
| C(5) -C(4) -H(4)  | 119.7     |
| C(6) -C(5) -C(4)  | 119.4(3)  |
| C(6) -C(5) -C(10) | 120.3(3)  |
| C(4) -C(5) -C(10) | 120.3(3)  |
| C(7) -C(6) -C(5)  | 120.7(3)  |
| C(7) -C(6) -H(6)  | 119.6     |
| C(5) -C(6) -H(6)  | 119.6     |



|                     |          |
|---------------------|----------|
| C(6)-C(7)-C(8)      | 120.2(3) |
| C(6)-C(7)-H(7)      | 119.9    |
| C(8)-C(7)-H(7)      | 119.9    |
| C(9)-C(8)-C(7)      | 121.7(3) |
| C(9)-C(8)-H(8)      | 119.2    |
| C(7)-C(8)-H(8)      | 119.2    |
| C(8)-C(9)-N(3)      | 120.0(3) |
| C(8)-C(9)-C(10)     | 119.6(3) |
| N(3)-C(9)-C(10)     | 120.4(3) |
| C(1)-C(10)-C(9)     | 125.3(3) |
| C(1)-C(10)-C(5)     | 117.5(3) |
| C(9)-C(10)-C(5)     | 117.2(3) |
| N(2)-C(11)-N(1)     | 114.2(3) |
| N(2)-C(11)-C(12)    | 126.3(3) |
| N(1)-C(11)-C(12)    | 119.0(3) |
| C(13)-C(12)-C(15)   | 108.0(4) |
| C(13)-C(12)-C(14)   | 108.7(4) |
| C(15)-C(12)-C(14)   | 105.5(4) |
| C(13)-C(12)-C(11)   | 106.9(3) |
| C(15)-C(12)-C(11)   | 112.8(3) |
| C(14)-C(12)-C(11)   | 114.7(3) |
| C(12)-C(13)-H(13A)  | 109.5    |
| C(12)-C(13)-H(13B)  | 109.5    |
| H(13A)-C(13)-H(13B) | 109.5    |
| C(12)-C(13)-H(13C)  | 109.5    |
| H(13A)-C(13)-H(13C) | 109.5    |
| H(13B)-C(13)-H(13C) | 109.5    |
| C(12)-C(14)-H(14A)  | 109.5    |
| C(12)-C(14)-H(14B)  | 109.5    |
| H(14A)-C(14)-H(14B) | 109.5    |
| C(12)-C(14)-H(14C)  | 109.5    |
| H(14A)-C(14)-H(14C) | 109.5    |
| H(14B)-C(14)-H(14C) | 109.5    |
| C(12)-C(15)-H(15A)  | 109.5    |
| C(12)-C(15)-H(15B)  | 109.5    |
| H(15A)-C(15)-H(15B) | 109.5    |
| C(12)-C(15)-H(15C)  | 109.5    |
| H(15A)-C(15)-H(15C) | 109.5    |
| H(15B)-C(15)-H(15C) | 109.5    |
| C(17)-C(16)-C(21)   | 121.3(3) |
| C(17)-C(16)-N(2)    | 120.7(3) |
| C(21)-C(16)-N(2)    | 117.7(3) |
| C(18)-C(17)-C(16)   | 118.2(3) |
| C(18)-C(17)-C(22)   | 118.2(3) |
| C(16)-C(17)-C(22)   | 123.6(3) |
| C(19)-C(18)-C(17)   | 121.1(4) |
| C(19)-C(18)-H(18)   | 119.4    |
| C(17)-C(18)-H(18)   | 119.4    |
| C(20)-C(19)-C(18)   | 120.1(4) |
| C(20)-C(19)-H(19)   | 120.0    |
| C(18)-C(19)-H(19)   | 120.0    |
| C(19)-C(20)-C(21)   | 121.0(4) |
| C(19)-C(20)-H(20)   | 119.5    |
| C(21)-C(20)-H(20)   | 119.5    |

|                     |          |
|---------------------|----------|
| C(20)-C(21)-C(16)   | 118.3(3) |
| C(20)-C(21)-C(23)   | 119.8(3) |
| C(16)-C(21)-C(23)   | 121.9(3) |
| C(17)-C(22)-H(22A)  | 109.5    |
| C(17)-C(22)-H(22B)  | 109.5    |
| H(22A)-C(22)-H(22B) | 109.5    |
| C(17)-C(22)-H(22C)  | 109.5    |
| H(22A)-C(22)-H(22C) | 109.5    |
| H(22B)-C(22)-H(22C) | 109.5    |
| C(21)-C(23)-H(23A)  | 109.5    |
| C(21)-C(23)-H(23B)  | 109.5    |
| H(23A)-C(23)-H(23B) | 109.5    |
| C(21)-C(23)-H(23C)  | 109.5    |
| H(23A)-C(23)-H(23C) | 109.5    |
| H(23B)-C(23)-H(23C) | 109.5    |
| N(4)-C(24)-N(3)     | 113.1(3) |
| N(4)-C(24)-C(25)    | 125.5(3) |
| N(3)-C(24)-C(25)    | 120.2(3) |
| C(26)-C(25)-C(28)   | 107.2(3) |
| C(26)-C(25)-C(27)   | 108.4(3) |
| C(28)-C(25)-C(27)   | 106.9(3) |
| C(26)-C(25)-C(24)   | 107.2(3) |
| C(28)-C(25)-C(24)   | 114.6(3) |
| C(27)-C(25)-C(24)   | 112.4(3) |
| C(25)-C(26)-H(26A)  | 109.5    |
| C(25)-C(26)-H(26B)  | 109.5    |
| H(26A)-C(26)-H(26B) | 109.5    |
| C(25)-C(26)-H(26C)  | 109.5    |
| H(26A)-C(26)-H(26C) | 109.5    |
| H(26B)-C(26)-H(26C) | 109.5    |
| C(25)-C(27)-H(27A)  | 109.5    |
| C(25)-C(27)-H(27B)  | 109.5    |
| H(27A)-C(27)-H(27B) | 109.5    |
| C(25)-C(27)-H(27C)  | 109.5    |
| H(27A)-C(27)-H(27C) | 109.5    |
| H(27B)-C(27)-H(27C) | 109.5    |
| C(25)-C(28)-H(28A)  | 109.5    |
| C(25)-C(28)-H(28B)  | 109.5    |
| H(28A)-C(28)-H(28B) | 109.5    |
| C(25)-C(28)-H(28C)  | 109.5    |
| H(28A)-C(28)-H(28C) | 109.5    |
| H(28B)-C(28)-H(28C) | 109.5    |
| C(34)-C(29)-C(30)   | 120.8(3) |
| C(34)-C(29)-N(4)    | 118.6(3) |
| C(30)-C(29)-N(4)    | 119.7(3) |
| C(31)-C(30)-C(29)   | 118.4(4) |
| C(31)-C(30)-C(35)   | 118.9(4) |
| C(29)-C(30)-C(35)   | 122.6(3) |
| C(32)-C(31)-C(30)   | 121.6(4) |
| C(32)-C(31)-H(31)   | 119.2    |
| C(30)-C(31)-H(31)   | 119.2    |
| C(31)-C(32)-C(33)   | 119.7(4) |
| C(31)-C(32)-H(32)   | 120.2    |
| C(33)-C(32)-H(32)   | 120.2    |

|                      |           |
|----------------------|-----------|
| C(32)-C(33)-C(34)    | 120.8(4)  |
| C(32)-C(33)-H(33)    | 119.6     |
| C(34)-C(33)-H(33)    | 119.6     |
| C(29)-C(34)-C(33)    | 118.6(4)  |
| C(29)-C(34)-C(36)    | 122.0(3)  |
| C(33)-C(34)-C(36)    | 119.3(4)  |
| C(30)-C(35)-H(35A)   | 109.5     |
| C(30)-C(35)-H(35B)   | 109.5     |
| H(35A)-C(35)-H(35B)  | 109.5     |
| C(30)-C(35)-H(35C)   | 109.5     |
| H(35A)-C(35)-H(35C)  | 109.5     |
| H(35B)-C(35)-H(35C)  | 109.5     |
| C(34)-C(36)-H(36A)   | 109.5     |
| C(34)-C(36)-H(36B)   | 109.5     |
| H(36A)-C(36)-H(36B)  | 109.5     |
| C(34)-C(36)-H(36C)   | 109.5     |
| H(36A)-C(36)-H(36C)  | 109.5     |
| H(36B)-C(36)-H(36C)  | 109.5     |
| C(37)-O(1)-C(40)     | 108.7(9)  |
| O(1)-C(37)-C(38)     | 109.6(8)  |
| O(1)-C(37)-H(37A)    | 109.7     |
| C(38)-C(37)-H(37A)   | 109.7     |
| O(1)-C(37)-H(37B)    | 109.7     |
| C(38)-C(37)-H(37B)   | 109.7     |
| H(37A)-C(37)-H(37B)  | 108.2     |
| C(39)-C(38)-C(37)    | 100.4(10) |
| C(39)-C(38)-H(38A)   | 111.7     |
| C(37)-C(38)-H(38A)   | 111.7     |
| C(39)-C(38)-H(38B)   | 111.7     |
| C(37)-C(38)-H(38B)   | 111.7     |
| H(38A)-C(38)-H(38B)  | 109.5     |
| C(40)-C(39)-C(38)    | 103.6(10) |
| C(40)-C(39)-H(39A)   | 111.0     |
| C(38)-C(39)-H(39A)   | 111.0     |
| C(40)-C(39)-H(39B)   | 111.0     |
| C(38)-C(39)-H(39B)   | 111.0     |
| H(39A)-C(39)-H(39B)  | 109.0     |
| O(1)-C(40)-C(39)     | 104.5(11) |
| O(1)-C(40)-H(40A)    | 110.9     |
| C(39)-C(40)-H(40A)   | 110.9     |
| O(1)-C(40)-H(40B)    | 110.9     |
| C(39)-C(40)-H(40B)   | 110.9     |
| H(40A)-C(40)-H(40B)  | 108.9     |
| C(37')-O(1')-C(40')  | 106.0(16) |
| O(1')-C(37')-C(38')  | 107.7(13) |
| O(1')-C(37')-H(37C)  | 110.2     |
| C(38')-C(37')-H(37C) | 110.2     |
| O(1')-C(37')-H(37D)  | 110.2     |
| C(38')-C(37')-H(37D) | 110.2     |
| H(37C)-C(37')-H(37D) | 108.5     |
| C(39')-C(38')-C(37') | 93.6(15)  |
| C(39')-C(38')-H(38C) | 113.0     |
| C(37')-C(38')-H(38C) | 113.0     |
| C(39')-C(38')-H(38D) | 113.0     |

|                        |            |
|------------------------|------------|
| C(37') -C(38') -H(38D) | 113.0      |
| H(38C) -C(38') -H(38D) | 110.4      |
| C(40') -C(39') -C(38') | 100.3 (18) |
| C(40') -C(39') -H(39C) | 111.7      |
| C(38') -C(39') -H(39C) | 111.7      |
| C(40') -C(39') -H(39D) | 111.7      |
| C(38') -C(39') -H(39D) | 111.7      |
| H(39C) -C(39') -H(39D) | 109.5      |
| O(1') -C(40') -C(39')  | 99.1 (18)  |
| O(1') -C(40') -H(40C)  | 111.9      |
| C(39') -C(40') -H(40C) | 111.9      |
| O(1') -C(40') -H(40D)  | 111.9      |
| C(39') -C(40') -H(40D) | 111.9      |
| H(40C) -C(40') -H(40D) | 109.6      |
| C(42) -C(43) -C(44)    | 103.6 (9)  |
| C(42) -C(43) -H(43A)   | 111.0      |
| C(44) -C(43) -H(43A)   | 111.0      |
| C(42) -C(43) -H(43B)   | 111.0      |
| C(44) -C(43) -H(43B)   | 111.0      |
| H(43A) -C(43) -H(43B)  | 109.0      |
| C(43) -C(42) -O(2)     | 106.2 (8)  |
| C(43) -C(42) -H(42A)   | 110.5      |
| O(2) -C(42) -H(42A)    | 110.5      |
| C(43) -C(42) -H(42B)   | 110.5      |
| O(2) -C(42) -H(42B)    | 110.5      |
| H(42A) -C(42) -H(42B)  | 108.7      |
| C(41) -O(2) -C(42)     | 103.7 (9)  |
| C(44) -C(41) -O(2)     | 108.9 (8)  |
| C(44) -C(41) -H(41A)   | 109.9      |
| O(2) -C(41) -H(41A)    | 109.9      |
| C(44) -C(41) -H(41B)   | 109.9      |
| O(2) -C(41) -H(41B)    | 109.9      |
| H(41A) -C(41) -H(41B)  | 108.3      |
| C(41) -C(44) -C(43)    | 110.4 (8)  |
| C(41) -C(44) -H(44A)   | 109.6      |
| C(43) -C(44) -H(44A)   | 109.6      |
| C(41) -C(44) -H(44B)   | 109.6      |
| C(43) -C(44) -H(44B)   | 109.6      |
| H(44A) -C(44) -H(44B)  | 108.1      |
| C(42') -C(43') -C(44') | 105 (2)    |
| C(42') -C(43') -H(43C) | 110.7      |
| C(44') -C(43') -H(43C) | 110.7      |
| C(42') -C(43') -H(43D) | 110.7      |
| C(44') -C(43') -H(43D) | 110.7      |
| H(43C) -C(43') -H(43D) | 108.8      |
| C(43') -C(42') -O(2')  | 107 (2)    |
| C(43') -C(42') -H(42C) | 110.4      |
| O(2') -C(42') -H(42C)  | 110.4      |
| C(43') -C(42') -H(42D) | 110.4      |
| O(2') -C(42') -H(42D)  | 110.4      |
| H(42C) -C(42') -H(42D) | 108.6      |
| C(42') -O(2') -C(41')  | 104 (2)    |
| C(44') -C(41') -O(2')  | 107.8 (18) |
| C(44') -C(41') -H(41C) | 110.1      |

|                      |            |
|----------------------|------------|
| O(2')-C(41')-H(41C)  | 110.2      |
| C(44')-C(41')-H(41D) | 110.2      |
| O(2')-C(41')-H(41D)  | 110.2      |
| H(41C)-C(41')-H(41D) | 108.5      |
| C(41')-C(44')-C(43') | 106.7(19)  |
| C(41')-C(44')-H(44C) | 110.4      |
| C(43')-C(44')-H(44C) | 110.4      |
| C(41')-C(44')-H(44D) | 110.4      |
| C(43')-C(44')-H(44D) | 110.4      |
| H(44C)-C(44')-H(44D) | 108.6      |
| C(11)-N(1)-C(1)      | 119.7(2)   |
| C(11)-N(1)-Sn(1)     | 112.43(18) |
| C(1)-N(1)-Sn(1)      | 126.11(19) |
| C(11)-N(2)-C(16)     | 126.8(3)   |
| C(11)-N(2)-Sn(1)#1   | 107.94(19) |
| C(16)-N(2)-Sn(1)#1   | 123.20(19) |
| C(9)-N(3)-C(24)      | 121.8(3)   |
| C(9)-N(3)-Sn(1)      | 124.34(19) |
| C(24)-N(3)-Sn(1)     | 110.35(19) |
| C(24)-N(4)-C(29)     | 131.6(3)   |
| N(3)-Sn(1)-N(1)      | 78.80(9)   |
| N(3)-Sn(1)-N(2)#1    | 97.73(9)   |
| N(1)-Sn(1)-N(2)#1    | 95.21(9)   |

---

Symmetry transformations used to generate equivalent atoms:  
#1 -x+2,-y+1,-z+1

Table S12. Anisotropic displacement parameters ( $\text{\AA}^2 \times 10^3$ ) for R102.  
The anisotropic displacement factor exponent takes the form:  
 $-2 \pi^2 [ h^2 a^{*2} U_{11} + \dots + 2 h k a^* b^* U_{12} ]$

|        | U11    | U22    | U33    | U23    | U13    | U12    |
|--------|--------|--------|--------|--------|--------|--------|
| C(1)   | 22(1)  | 29(2)  | 24(1)  | 3(1)   | -6(1)  | -3(1)  |
| C(2)   | 30(2)  | 38(2)  | 24(2)  | -1(1)  | -6(1)  | -2(1)  |
| C(3)   | 33(2)  | 47(2)  | 24(2)  | 6(1)   | -9(1)  | -3(2)  |
| C(4)   | 34(2)  | 40(2)  | 30(2)  | 10(1)  | -12(1) | -3(1)  |
| C(5)   | 25(2)  | 31(2)  | 29(2)  | 5(1)   | -8(1)  | -5(1)  |
| C(6)   | 36(2)  | 31(2)  | 42(2)  | 4(1)   | -13(2) | 0(1)   |
| C(7)   | 41(2)  | 32(2)  | 41(2)  | -2(2)  | -9(2)  | 0(2)   |
| C(8)   | 35(2)  | 37(2)  | 29(2)  | -1(1)  | -6(1)  | -5(1)  |
| C(9)   | 25(1)  | 30(2)  | 26(1)  | 2(1)   | -6(1)  | -6(1)  |
| C(10)  | 23(1)  | 28(2)  | 24(1)  | 6(1)   | -4(1)  | -5(1)  |
| C(11)  | 24(1)  | 27(2)  | 24(1)  | 6(1)   | -10(1) | -5(1)  |
| C(12)  | 25(2)  | 33(2)  | 38(2)  | 0(1)   | -5(1)  | -7(1)  |
| C(13)  | 51(3)  | 112(4) | 85(4)  | 63(3)  | -27(3) | -44(3) |
| C(14)  | 52(3)  | 103(4) | 89(4)  | -41(3) | 8(3)   | -46(3) |
| C(15)  | 26(2)  | 44(2)  | 117(4) | 6(2)   | 6(2)   | -10(2) |
| C(16)  | 22(1)  | 26(2)  | 39(2)  | 2(1)   | -3(1)  | -4(1)  |
| C(17)  | 25(2)  | 30(2)  | 49(2)  | 9(1)   | -5(1)  | -7(1)  |
| C(18)  | 38(2)  | 32(2)  | 65(3)  | 13(2)  | 0(2)   | -3(2)  |
| C(19)  | 58(3)  | 26(2)  | 75(3)  | -4(2)  | 6(2)   | -5(2)  |
| C(20)  | 54(2)  | 36(2)  | 50(2)  | -9(2)  | 3(2)   | -12(2) |
| C(21)  | 30(2)  | 34(2)  | 39(2)  | -3(1)  | -1(1)  | -10(1) |
| C(22)  | 35(2)  | 44(2)  | 50(2)  | 15(2)  | -15(2) | -9(2)  |
| C(23)  | 51(2)  | 43(2)  | 34(2)  | -3(2)  | -10(2) | -14(2) |
| C(24)  | 33(2)  | 30(2)  | 22(1)  | 1(1)   | -2(1)  | -6(1)  |
| C(25)  | 30(2)  | 50(2)  | 26(2)  | 2(1)   | -3(1)  | -8(2)  |
| C(26)  | 45(2)  | 58(3)  | 56(2)  | 13(2)  | -5(2)  | -20(2) |
| C(27)  | 37(2)  | 73(3)  | 33(2)  | -10(2) | 2(2)   | -3(2)  |
| C(28)  | 32(2)  | 69(3)  | 34(2)  | 1(2)   | -4(2)  | -13(2) |
| C(29)  | 33(2)  | 48(2)  | 25(2)  | 6(1)   | -6(1)  | -5(2)  |
| C(30)  | 41(2)  | 50(2)  | 27(2)  | -1(2)  | -5(1)  | -5(2)  |
| C(31)  | 55(2)  | 75(3)  | 25(2)  | -4(2)  | -12(2) | -8(2)  |
| C(32)  | 69(3)  | 86(3)  | 25(2)  | 7(2)   | -17(2) | 1(3)   |
| C(33)  | 60(3)  | 66(3)  | 36(2)  | 18(2)  | -16(2) | 1(2)   |
| C(34)  | 43(2)  | 52(2)  | 29(2)  | 7(2)   | -6(2)  | -5(2)  |
| C(35)  | 56(2)  | 50(2)  | 40(2)  | -6(2)  | -7(2)  | -8(2)  |
| C(36)  | 66(3)  | 44(2)  | 48(2)  | 8(2)   | -15(2) | 1(2)   |
| O(1)   | 152(5) | 77(3)  | 112(5) | -14(4) | -65(4) | -7(4)  |
| C(37)  | 145(6) | 65(4)  | 119(6) | -22(4) | -58(5) | -9(4)  |
| C(38)  | 148(6) | 75(4)  | 117(6) | -9(4)  | -63(5) | -2(4)  |
| C(39)  | 151(6) | 71(4)  | 121(6) | -20(4) | -64(5) | -15(4) |
| C(40)  | 149(5) | 71(4)  | 122(6) | -8(4)  | -56(5) | -3(4)  |
| O(1')  | 145(6) | 78(4)  | 128(6) | -15(5) | -57(5) | -14(4) |
| C(37') | 151(6) | 71(4)  | 123(7) | -16(5) | -59(5) | -10(4) |
| C(38') | 147(6) | 75(5)  | 119(7) | -19(5) | -60(5) | -1(5)  |
| C(39') | 149(6) | 70(4)  | 118(7) | -21(5) | -56(5) | -4(5)  |

|        |         |         |         |        |        |         |
|--------|---------|---------|---------|--------|--------|---------|
| C(40') | 148(6)  | 70(4)   | 122(6)  | -13(5) | -56(5) | -7(5)   |
| C(43)  | 113(8)  | 98(7)   | 134(9)  | -3(6)  | -9(6)  | -15(6)  |
| C(42)  | 111(9)  | 99(7)   | 150(11) | -4(8)  | -26(8) | -8(6)   |
| O(2)   | 331(16) | 133(8)  | 126(7)  | -4(6)  | 5(9)   | -46(10) |
| C(41)  | 175(9)  | 118(7)  | 114(6)  | -25(6) | 27(6)  | 10(6)   |
| C(44)  | 170(9)  | 106(6)  | 102(6)  | -17(5) | 13(6)  | 10(6)   |
| C(43') | 172(11) | 115(9)  | 106(8)  | -18(8) | 16(8)  | 9(8)    |
| C(42') | 171(13) | 116(10) | 103(10) | -14(9) | 17(10) | 14(10)  |
| O(2')  | 170(12) | 118(9)  | 104(10) | -12(9) | 17(10) | 17(10)  |
| C(41') | 173(11) | 117(9)  | 106(8)  | -18(8) | 17(8)  | 15(8)   |
| C(44') | 172(10) | 116(8)  | 107(8)  | -22(7) | 18(8)  | 10(8)   |
| N(1)   | 25(1)   | 27(1)   | 22(1)   | 0(1)   | -7(1)  | -5(1)   |
| N(2)   | 22(1)   | 26(1)   | 26(1)   | 2(1)   | -7(1)  | -5(1)   |
| N(3)   | 28(1)   | 33(1)   | 19(1)   | 3(1)   | -5(1)  | -3(1)   |
| N(4)   | 35(2)   | 37(2)   | 21(1)   | 3(1)   | -8(1)  | -5(1)   |
| Sn(1)  | 25(1)   | 28(1)   | 21(1)   | 4(1)   | -7(1)  | -5(1)   |

---

# Crystal data and structure refinement of compound (L<sub>1</sub>Ge)<sub>2</sub>

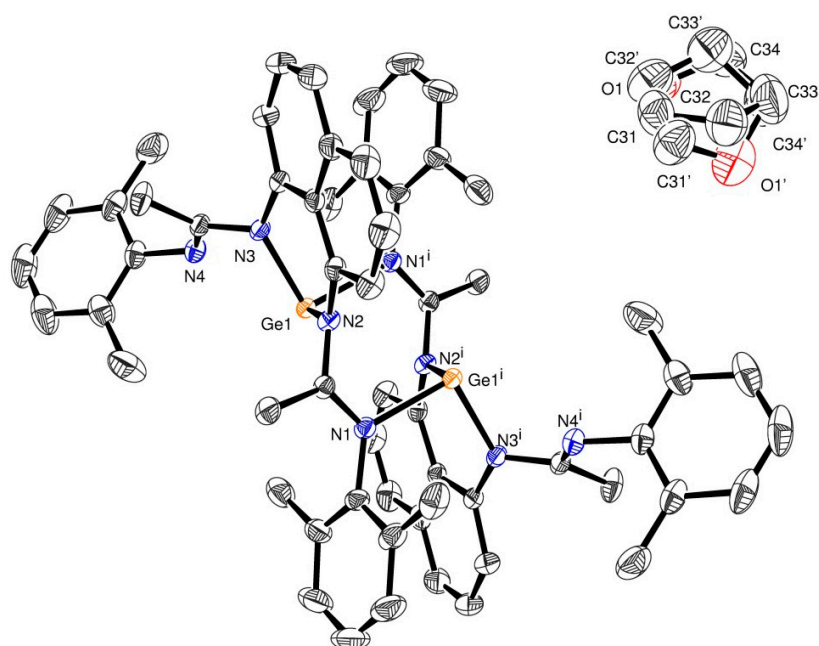

Figure S5. Asymmetric Unit [Symmetry code : (i) 1-x, 1-y, 1-z]

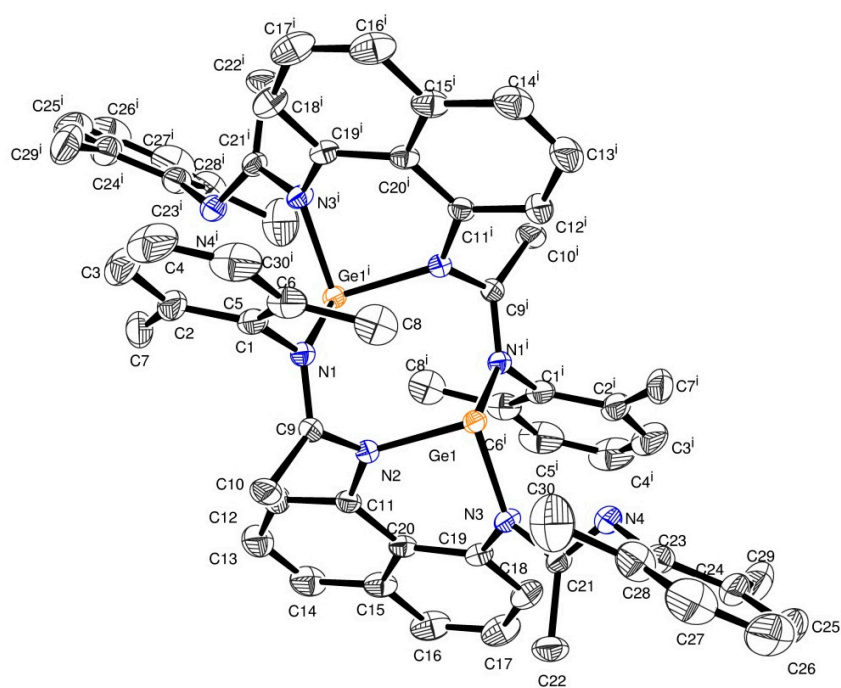

Figure S6. Compound [Symmetry code : (i) 1-x, 1-y, 1-z]



Table S13. Crystal data and structure refinement for AA-R34.

|                                   |                                                                                                                                      |
|-----------------------------------|--------------------------------------------------------------------------------------------------------------------------------------|
| Identification code               | AA-R34                                                                                                                               |
| Empirical formula                 | C60 H60 Ge2 N8, 2(C4 H8 O)                                                                                                           |
| Formula weight                    | 1182.59                                                                                                                              |
| Temperature                       | 193(2) K                                                                                                                             |
| Wavelength                        | 0.71073 Å                                                                                                                            |
| Crystal system, space group       | Triclinic, P $\bar{1}$                                                                                                               |
| Unit cell dimensions              | a = 9.1577(4) Å    alpha = 65.967(2) deg.<br>b = 12.9975(5) Å    beta = 73.850(2) deg.<br>c = 14.4975(5) Å    gamma = 83.201(2) deg. |
| Volume                            | 1513.79(11) Å <sup>3</sup>                                                                                                           |
| Z, Calculated density             | 1, 1.297 Mg/m <sup>3</sup>                                                                                                           |
| Absorption coefficient            | 1.044 mm <sup>-1</sup>                                                                                                               |
| F(000)                            | 620                                                                                                                                  |
| Crystal size                      | 0.200 x 0.080 x 0.060 mm                                                                                                             |
| Theta range for data collection   | 2.874 to 34.433 deg.                                                                                                                 |
| Limiting indices                  | -14 ≤ h ≤ 14, -20 ≤ k ≤ 20,<br>-23 ≤ l ≤ 21                                                                                          |
| Reflections collected / unique    | 62134 / 12689 [R(int) = 0.0398]                                                                                                      |
| Completeness to theta = 25.242    | 99.5 %                                                                                                                               |
| Refinement method                 | Full-matrix least-squares on F <sup>2</sup>                                                                                          |
| Data / restraints / parameters    | 12689 / 186 / 414                                                                                                                    |
| Goodness-of-fit on F <sup>2</sup> | 1.051                                                                                                                                |
| Final R indices [I > 2sigma(I)]   | R1 = 0.0381, wR2 = 0.0898                                                                                                            |
| R indices (all data)              | R1 = 0.0527, wR2 = 0.0964                                                                                                            |
| Largest diff. peak and hole       | 0.674 and -0.468 e.Å <sup>-3</sup>                                                                                                   |

Table S14. Atomic coordinates ( $\times 10^4$ ) and equivalent isotropic displacement parameters ( $\text{\AA}^2 \times 10^3$ ) for AA-R34. U(eq) is defined as one third of the trace of the orthogonalized Uij tensor.

|        | x        | y        | z        | U(eq) |
|--------|----------|----------|----------|-------|
| C(1)   | 5002(2)  | 4429(1)  | 7510(1)  | 26(1) |
| C(2)   | 5066(2)  | 3390(2)  | 8339(1)  | 35(1) |
| C(3)   | 4578(2)  | 3367(2)  | 9350(1)  | 51(1) |
| C(4)   | 4064(2)  | 4323(2)  | 9526(2)  | 59(1) |
| C(5)   | 4052(2)  | 5347(2)  | 8696(2)  | 50(1) |
| C(6)   | 4523(2)  | 5419(2)  | 7669(1)  | 33(1) |
| C(7)   | 5668(2)  | 2348(2)  | 8151(1)  | 42(1) |
| C(8)   | 4540(2)  | 6536(2)  | 6771(2)  | 40(1) |
| C(9)   | 6772(1)  | 4662(1)  | 5873(1)  | 20(1) |
| C(10)  | 8088(2)  | 4774(1)  | 6255(1)  | 30(1) |
| C(11)  | 8077(1)  | 4261(1)  | 4369(1)  | 21(1) |
| C(12)  | 8404(2)  | 3167(1)  | 4984(1)  | 30(1) |
| C(13)  | 9418(2)  | 2482(1)  | 4552(2)  | 39(1) |
| C(14)  | 10050(2) | 2866(1)  | 3507(2)  | 38(1) |
| C(15)  | 9725(2)  | 3965(1)  | 2840(1)  | 29(1) |
| C(16)  | 10386(2) | 4347(2)  | 1752(1)  | 39(1) |
| C(17)  | 10089(2) | 5406(2)  | 1096(1)  | 40(1) |
| C(18)  | 9133(2)  | 6137(1)  | 1500(1)  | 31(1) |
| C(19)  | 8510(1)  | 5817(1)  | 2560(1)  | 22(1) |
| C(20)  | 8744(1)  | 4698(1)  | 3267(1)  | 21(1) |
| C(21)  | 8118(1)  | 7709(1)  | 2521(1)  | 21(1) |
| C(22)  | 9799(2)  | 7948(1)  | 2184(1)  | 35(1) |
| C(23)  | 7531(2)  | 9586(1)  | 2280(1)  | 28(1) |
| C(24)  | 7771(2)  | 10359(1) | 1239(1)  | 36(1) |
| C(25)  | 8141(2)  | 11472(2) | 1003(2)  | 52(1) |
| C(26)  | 8267(3)  | 11801(2) | 1762(2)  | 60(1) |
| C(27)  | 7999(2)  | 11041(2) | 2785(2)  | 55(1) |
| C(28)  | 7608(2)  | 9924(2)  | 3071(2)  | 39(1) |
| C(29)  | 7619(3)  | 9999(2)  | 413(1)   | 50(1) |
| C(30)  | 7269(3)  | 9095(2)  | 4187(2)  | 59(1) |
| O(1)   | 2910(4)  | 1766(2)  | 1930(2)  | 76(1) |
| C(31)  | 3761(5)  | 1192(4)  | 2702(4)  | 74(1) |
| C(32)  | 3318(5)  | -47(4)   | 3259(4)  | 81(1) |
| C(33)  | 2147(10) | -147(6)  | 2799(5)  | 93(2) |
| C(34)  | 2378(5)  | 886(4)   | 1778(4)  | 79(1) |
| O(1')  | 2125(11) | 254(9)   | 3602(7)  | 97(2) |
| C(31') | 3548(13) | 772(13)  | 3286(8)  | 78(2) |
| C(32') | 3854(18) | 1449(13) | 2118(10) | 81(2) |
| C(33') | 3102(19) | 812(15)  | 1777(10) | 90(2) |
| C(34') | 1980(30) | 50(20)   | 2741(11) | 88(3) |
| Ge(1)  | 5879(1)  | 6276(1)  | 4108(1)  | 18(1) |
| N(1)   | 5383(1)  | 4465(1)  | 6463(1)  | 20(1) |
| N(2)   | 6962(1)  | 4871(1)  | 4839(1)  | 20(1) |
| N(3)   | 7640(1)  | 6605(1)  | 2931(1)  | 21(1) |

|       |          |          |          |        |
|-------|----------|----------|----------|--------|
| N (4) | 7093 (1) | 8469 (1) | 2558 (1) | 25 (1) |
|-------|----------|----------|----------|--------|

---

Table S15. Bond lengths [Å] and angles [deg] for AA-R34.

---

|              |            |
|--------------|------------|
| C(1)-C(6)    | 1.397(2)   |
| C(1)-C(2)    | 1.403(2)   |
| C(1)-N(1)    | 1.4419(16) |
| C(2)-C(3)    | 1.397(2)   |
| C(2)-C(7)    | 1.502(3)   |
| C(3)-C(4)    | 1.372(4)   |
| C(3)-H(3)    | 0.9500     |
| C(4)-C(5)    | 1.386(3)   |
| C(4)-H(4)    | 0.9500     |
| C(5)-C(6)    | 1.397(2)   |
| C(5)-H(5)    | 0.9500     |
| C(6)-C(8)    | 1.502(3)   |
| C(7)-H(7A)   | 0.9800     |
| C(7)-H(7B)   | 0.9800     |
| C(7)-H(7C)   | 0.9800     |
| C(8)-H(8A)   | 0.9800     |
| C(8)-H(8B)   | 0.9800     |
| C(8)-H(8C)   | 0.9800     |
| C(9)-N(1)    | 1.3074(16) |
| C(9)-N(2)    | 1.3740(16) |
| C(9)-C(10)   | 1.5027(18) |
| C(10)-H(10A) | 0.9800     |
| C(10)-H(10B) | 0.9800     |
| C(10)-H(10C) | 0.9800     |
| C(11)-C(12)  | 1.3867(18) |
| C(11)-N(2)   | 1.4125(16) |
| C(11)-C(20)  | 1.4317(18) |
| C(12)-C(13)  | 1.408(2)   |
| C(12)-H(12)  | 0.9500     |
| C(13)-C(14)  | 1.358(3)   |
| C(13)-H(13)  | 0.9500     |
| C(14)-C(15)  | 1.414(2)   |
| C(14)-H(14)  | 0.9500     |
| C(15)-C(16)  | 1.416(2)   |
| C(15)-C(20)  | 1.4373(18) |
| C(16)-C(17)  | 1.364(3)   |
| C(16)-H(16)  | 0.9500     |
| C(17)-C(18)  | 1.408(2)   |
| C(17)-H(17)  | 0.9500     |
| C(18)-C(19)  | 1.3815(18) |
| C(18)-H(18)  | 0.9500     |
| C(19)-N(3)   | 1.4102(16) |
| C(19)-C(20)  | 1.4305(18) |
| C(21)-N(4)   | 1.2869(17) |
| C(21)-N(3)   | 1.3831(16) |
| C(21)-C(22)  | 1.5089(19) |
| C(22)-H(22A) | 0.9800     |
| C(22)-H(22B) | 0.9800     |
| C(22)-H(22C) | 0.9800     |
| C(23)-C(24)  | 1.402(2)   |
| C(23)-C(28)  | 1.404(2)   |

|                |            |
|----------------|------------|
| C(23)-N(4)     | 1.4153(18) |
| C(24)-C(25)    | 1.406(2)   |
| C(24)-C(29)    | 1.496(3)   |
| C(25)-C(26)    | 1.368(4)   |
| C(25)-H(25)    | 0.9500     |
| C(26)-C(27)    | 1.377(4)   |
| C(26)-H(26)    | 0.9500     |
| C(27)-C(28)    | 1.400(3)   |
| C(27)-H(27)    | 0.9500     |
| C(28)-C(30)    | 1.502(3)   |
| C(29)-H(29A)   | 0.9800     |
| C(29)-H(29B)   | 0.9800     |
| C(29)-H(29C)   | 0.9800     |
| C(30)-H(30A)   | 0.9800     |
| C(30)-H(30B)   | 0.9800     |
| C(30)-H(30C)   | 0.9800     |
| O(1)-C(34)     | 1.410(5)   |
| O(1)-C(31)     | 1.443(5)   |
| C(31)-C(32)    | 1.524(6)   |
| C(31)-H(31A)   | 0.9900     |
| C(31)-H(31B)   | 0.9900     |
| C(32)-C(33)    | 1.454(8)   |
| C(32)-H(32A)   | 0.9900     |
| C(32)-H(32B)   | 0.9900     |
| C(33)-C(34)    | 1.521(7)   |
| C(33)-H(33A)   | 0.9900     |
| C(33)-H(33B)   | 0.9900     |
| C(34)-H(34A)   | 0.9900     |
| C(34)-H(34B)   | 0.9900     |
| O(1')-C(31')   | 1.410(9)   |
| O(1')-C(34')   | 1.421(11)  |
| C(31')-C(32')  | 1.517(10)  |
| C(31')-H(31C)  | 0.9900     |
| C(31')-H(31D)  | 0.9900     |
| C(32')-C(33')  | 1.436(11)  |
| C(32')-H(32C)  | 0.9900     |
| C(32')-H(32D)  | 0.9900     |
| C(33')-C(34')  | 1.517(10)  |
| C(33')-H(33C)  | 0.9900     |
| C(33')-H(33D)  | 0.9900     |
| C(34')-H(34C)  | 0.9900     |
| C(34')-H(34D)  | 0.9900     |
| Ge(1)-N(3)     | 1.9332(10) |
| Ge(1)-N(2)     | 2.0048(10) |
| Ge(1)-N(1)#1   | 2.0961(11) |
|                |            |
| C(6)-C(1)-C(2) | 122.28(14) |
| C(6)-C(1)-N(1) | 118.95(13) |
| C(2)-C(1)-N(1) | 118.71(14) |
| C(3)-C(2)-C(1) | 117.35(18) |
| C(3)-C(2)-C(7) | 121.06(16) |
| C(1)-C(2)-C(7) | 121.57(14) |
| C(4)-C(3)-C(2) | 121.36(19) |
| C(4)-C(3)-H(3) | 119.3      |

|                         |             |
|-------------------------|-------------|
| C(2) - C(3) - H(3)      | 119.3       |
| C(3) - C(4) - C(5)      | 120.39 (17) |
| C(3) - C(4) - H(4)      | 119.8       |
| C(5) - C(4) - H(4)      | 119.8       |
| C(4) - C(5) - C(6)      | 120.7 (2)   |
| C(4) - C(5) - H(5)      | 119.7       |
| C(6) - C(5) - H(5)      | 119.7       |
| C(5) - C(6) - C(1)      | 117.91 (17) |
| C(5) - C(6) - C(8)      | 120.38 (17) |
| C(1) - C(6) - C(8)      | 121.70 (13) |
| C(2) - C(7) - H(7A)     | 109.5       |
| C(2) - C(7) - H(7B)     | 109.5       |
| H(7A) - C(7) - H(7B)    | 109.5       |
| C(2) - C(7) - H(7C)     | 109.5       |
| H(7A) - C(7) - H(7C)    | 109.5       |
| H(7B) - C(7) - H(7C)    | 109.5       |
| C(6) - C(8) - H(8A)     | 109.5       |
| C(6) - C(8) - H(8B)     | 109.5       |
| H(8A) - C(8) - H(8B)    | 109.5       |
| C(6) - C(8) - H(8C)     | 109.5       |
| H(8A) - C(8) - H(8C)    | 109.5       |
| H(8B) - C(8) - H(8C)    | 109.5       |
| N(1) - C(9) - N(2)      | 116.31 (11) |
| N(1) - C(9) - C(10)     | 123.05 (12) |
| N(2) - C(9) - C(10)     | 120.36 (11) |
| C(9) - C(10) - H(10A)   | 109.5       |
| C(9) - C(10) - H(10B)   | 109.5       |
| H(10A) - C(10) - H(10B) | 109.5       |
| C(9) - C(10) - H(10C)   | 109.5       |
| H(10A) - C(10) - H(10C) | 109.5       |
| H(10B) - C(10) - H(10C) | 109.5       |
| C(12) - C(11) - N(2)    | 118.31 (12) |
| C(12) - C(11) - C(20)   | 119.64 (12) |
| N(2) - C(11) - C(20)    | 121.69 (11) |
| C(11) - C(12) - C(13)   | 121.36 (14) |
| C(11) - C(12) - H(12)   | 119.3       |
| C(13) - C(12) - H(12)   | 119.3       |
| C(14) - C(13) - C(12)   | 120.31 (15) |
| C(14) - C(13) - H(13)   | 119.8       |
| C(12) - C(13) - H(13)   | 119.8       |
| C(13) - C(14) - C(15)   | 120.67 (14) |
| C(13) - C(14) - H(14)   | 119.7       |
| C(15) - C(14) - H(14)   | 119.7       |
| C(14) - C(15) - C(16)   | 119.79 (14) |
| C(14) - C(15) - C(20)   | 120.10 (14) |
| C(16) - C(15) - C(20)   | 120.10 (14) |
| C(17) - C(16) - C(15)   | 120.61 (14) |
| C(17) - C(16) - H(16)   | 119.7       |
| C(15) - C(16) - H(16)   | 119.7       |
| C(16) - C(17) - C(18)   | 120.10 (15) |
| C(16) - C(17) - H(17)   | 119.9       |
| C(18) - C(17) - H(17)   | 119.9       |
| C(19) - C(18) - C(17)   | 121.36 (15) |
| C(19) - C(18) - H(18)   | 119.3       |

|                     |            |
|---------------------|------------|
| C(17)-C(18)-H(18)   | 119.3      |
| C(18)-C(19)-N(3)    | 119.18(12) |
| C(18)-C(19)-C(20)   | 120.04(12) |
| N(3)-C(19)-C(20)    | 120.77(11) |
| C(19)-C(20)-C(11)   | 124.53(11) |
| C(19)-C(20)-C(15)   | 117.63(12) |
| C(11)-C(20)-C(15)   | 117.85(12) |
| N(4)-C(21)-N(3)     | 117.45(11) |
| N(4)-C(21)-C(22)    | 123.03(12) |
| N(3)-C(21)-C(22)    | 119.03(11) |
| C(21)-C(22)-H(22A)  | 109.5      |
| C(21)-C(22)-H(22B)  | 109.5      |
| H(22A)-C(22)-H(22B) | 109.5      |
| C(21)-C(22)-H(22C)  | 109.5      |
| H(22A)-C(22)-H(22C) | 109.5      |
| H(22B)-C(22)-H(22C) | 109.5      |
| C(24)-C(23)-C(28)   | 121.00(14) |
| C(24)-C(23)-N(4)    | 119.86(14) |
| C(28)-C(23)-N(4)    | 118.97(14) |
| C(23)-C(24)-C(25)   | 118.11(18) |
| C(23)-C(24)-C(29)   | 120.42(14) |
| C(25)-C(24)-C(29)   | 121.47(17) |
| C(26)-C(25)-C(24)   | 121.3(2)   |
| C(26)-C(25)-H(25)   | 119.3      |
| C(24)-C(25)-H(25)   | 119.3      |
| C(25)-C(26)-C(27)   | 120.03(17) |
| C(25)-C(26)-H(26)   | 120.0      |
| C(27)-C(26)-H(26)   | 120.0      |
| C(26)-C(27)-C(28)   | 121.3(2)   |
| C(26)-C(27)-H(27)   | 119.4      |
| C(28)-C(27)-H(27)   | 119.4      |
| C(27)-C(28)-C(23)   | 118.17(19) |
| C(27)-C(28)-C(30)   | 121.82(19) |
| C(23)-C(28)-C(30)   | 120.01(16) |
| C(24)-C(29)-H(29A)  | 109.5      |
| C(24)-C(29)-H(29B)  | 109.5      |
| H(29A)-C(29)-H(29B) | 109.5      |
| C(24)-C(29)-H(29C)  | 109.5      |
| H(29A)-C(29)-H(29C) | 109.5      |
| H(29B)-C(29)-H(29C) | 109.5      |
| C(28)-C(30)-H(30A)  | 109.5      |
| C(28)-C(30)-H(30B)  | 109.5      |
| H(30A)-C(30)-H(30B) | 109.5      |
| C(28)-C(30)-H(30C)  | 109.5      |
| H(30A)-C(30)-H(30C) | 109.5      |
| H(30B)-C(30)-H(30C) | 109.5      |
| C(34)-O(1)-C(31)    | 103.9(3)   |
| O(1)-C(31)-C(32)    | 109.8(3)   |
| O(1)-C(31)-H(31A)   | 109.7      |
| C(32)-C(31)-H(31A)  | 109.7      |
| O(1)-C(31)-H(31B)   | 109.7      |
| C(32)-C(31)-H(31B)  | 109.7      |
| H(31A)-C(31)-H(31B) | 108.2      |
| C(33)-C(32)-C(31)   | 104.2(4)   |

|                      |            |
|----------------------|------------|
| C(33)-C(32)-H(32A)   | 110.9      |
| C(31)-C(32)-H(32A)   | 110.9      |
| C(33)-C(32)-H(32B)   | 110.9      |
| C(31)-C(32)-H(32B)   | 110.9      |
| H(32A)-C(32)-H(32B)  | 108.9      |
| C(32)-C(33)-C(34)    | 103.8(4)   |
| C(32)-C(33)-H(33A)   | 111.0      |
| C(34)-C(33)-H(33A)   | 111.0      |
| C(32)-C(33)-H(33B)   | 111.0      |
| C(34)-C(33)-H(33B)   | 111.0      |
| H(33A)-C(33)-H(33B)  | 109.0      |
| O(1)-C(34)-C(33)     | 108.1(4)   |
| O(1)-C(34)-H(34A)    | 110.1      |
| C(33)-C(34)-H(34A)   | 110.1      |
| O(1)-C(34)-H(34B)    | 110.1      |
| C(33)-C(34)-H(34B)   | 110.1      |
| H(34A)-C(34)-H(34B)  | 108.4      |
| C(31')-O(1')-C(34')  | 106.1(9)   |
| O(1')-C(31')-C(32')  | 106.7(8)   |
| O(1')-C(31')-H(31C)  | 110.4      |
| C(32')-C(31')-H(31C) | 110.4      |
| O(1')-C(31')-H(31D)  | 110.4      |
| C(32')-C(31')-H(31D) | 110.4      |
| H(31C)-C(31')-H(31D) | 108.6      |
| C(33')-C(32')-C(31') | 103.2(9)   |
| C(33')-C(32')-H(32C) | 111.1      |
| C(31')-C(32')-H(32C) | 111.1      |
| C(33')-C(32')-H(32D) | 111.1      |
| C(31')-C(32')-H(32D) | 111.1      |
| H(32C)-C(32')-H(32D) | 109.1      |
| C(32')-C(33')-C(34') | 106.5(9)   |
| C(32')-C(33')-H(33C) | 110.4      |
| C(34')-C(33')-H(33C) | 110.4      |
| C(32')-C(33')-H(33D) | 110.4      |
| C(34')-C(33')-H(33D) | 110.4      |
| H(33C)-C(33')-H(33D) | 108.6      |
| O(1')-C(34')-C(33')  | 107.3(10)  |
| O(1')-C(34')-H(34C)  | 110.3      |
| C(33')-C(34')-H(34C) | 110.2      |
| O(1')-C(34')-H(34D)  | 110.2      |
| C(33')-C(34')-H(34D) | 110.2      |
| H(34C)-C(34')-H(34D) | 108.5      |
| N(3)-Ge(1)-N(2)      | 87.48(4)   |
| N(3)-Ge(1)-N(1)#1    | 95.69(4)   |
| N(2)-Ge(1)-N(1)#1    | 96.79(4)   |
| C(9)-N(1)-C(1)       | 121.22(11) |
| C(9)-N(1)-Ge(1)#1    | 110.44(8)  |
| C(1)-N(1)-Ge(1)#1    | 125.38(8)  |
| C(9)-N(2)-C(11)      | 119.28(10) |
| C(9)-N(2)-Ge(1)      | 112.38(8)  |
| C(11)-N(2)-Ge(1)     | 126.95(8)  |
| C(21)-N(3)-C(19)     | 120.24(10) |
| C(21)-N(3)-Ge(1)     | 113.24(8)  |
| C(19)-N(3)-Ge(1)     | 126.15(8)  |



C(21)-N(4)-C(23) 119.68(12)

---

Symmetry transformations used to generate equivalent atoms:  
#1 -x+1, -y+1, -z+1

Table S16. Anisotropic displacement parameters ( $\text{\AA}^2 \times 10^3$ ) for AA-R34.  
The anisotropic displacement factor exponent takes the form:  
 $-2 \pi^2 [ h^2 a^{*2} U_{11} + \dots + 2 h k a^* b^* U_{12} ]$

|        | U11   | U22    | U33    | U23    | U13    | U12    |
|--------|-------|--------|--------|--------|--------|--------|
| C(1)   | 20(1) | 39(1)  | 19(1)  | -11(1) | -4(1)  | -6(1)  |
| C(2)   | 29(1) | 47(1)  | 22(1)  | -3(1)  | -9(1)  | -11(1) |
| C(3)   | 46(1) | 77(1)  | 20(1)  | -5(1)  | -9(1)  | -20(1) |
| C(4)   | 48(1) | 107(2) | 26(1)  | -32(1) | 0(1)   | -20(1) |
| C(5)   | 40(1) | 84(2)  | 42(1)  | -44(1) | -4(1)  | -6(1)  |
| C(6)   | 27(1) | 49(1)  | 31(1)  | -23(1) | -5(1)  | -4(1)  |
| C(7)   | 40(1) | 36(1)  | 38(1)  | 4(1)   | -20(1) | -7(1)  |
| C(8)   | 44(1) | 39(1)  | 48(1)  | -28(1) | -12(1) | 1(1)   |
| C(9)   | 18(1) | 22(1)  | 20(1)  | -6(1)  | -7(1)  | -1(1)  |
| C(10)  | 21(1) | 42(1)  | 28(1)  | -10(1) | -9(1)  | -7(1)  |
| C(11)  | 16(1) | 21(1)  | 25(1)  | -9(1)  | -5(1)  | -1(1)  |
| C(12)  | 27(1) | 23(1)  | 33(1)  | -6(1)  | -7(1)  | 3(1)   |
| C(13)  | 34(1) | 25(1)  | 52(1)  | -12(1) | -11(1) | 7(1)   |
| C(14)  | 30(1) | 29(1)  | 56(1)  | -23(1) | -5(1)  | 6(1)   |
| C(15)  | 23(1) | 29(1)  | 38(1)  | -20(1) | -1(1)  | -2(1)  |
| C(16)  | 35(1) | 42(1)  | 43(1)  | -29(1) | 6(1)   | -4(1)  |
| C(17)  | 42(1) | 46(1)  | 30(1)  | -23(1) | 8(1)   | -9(1)  |
| C(18)  | 34(1) | 34(1)  | 23(1)  | -12(1) | 1(1)   | -7(1)  |
| C(19)  | 19(1) | 24(1)  | 22(1)  | -10(1) | -1(1)  | -5(1)  |
| C(20)  | 17(1) | 22(1)  | 26(1)  | -12(1) | -3(1)  | -3(1)  |
| C(21)  | 21(1) | 20(1)  | 20(1)  | -5(1)  | -4(1)  | -4(1)  |
| C(22)  | 21(1) | 28(1)  | 52(1)  | -13(1) | -3(1)  | -5(1)  |
| C(23)  | 24(1) | 21(1)  | 37(1)  | -10(1) | -6(1)  | -1(1)  |
| C(24)  | 32(1) | 23(1)  | 41(1)  | -3(1)  | -4(1)  | -3(1)  |
| C(25)  | 42(1) | 23(1)  | 68(1)  | -3(1)  | -1(1)  | -5(1)  |
| C(26)  | 48(1) | 26(1)  | 102(2) | -25(1) | -10(1) | -5(1)  |
| C(27)  | 50(1) | 41(1)  | 92(2)  | -42(1) | -22(1) | 4(1)   |
| C(28)  | 39(1) | 34(1)  | 54(1)  | -23(1) | -17(1) | 4(1)   |
| C(29)  | 58(1) | 43(1)  | 33(1)  | 1(1)   | -8(1)  | -10(1) |
| C(30)  | 85(2) | 59(1)  | 49(1)  | -29(1) | -31(1) | 5(1)   |
| O(1)   | 84(2) | 59(1)  | 68(2)  | -22(1) | 6(1)   | -3(1)  |
| C(31)  | 57(2) | 81(2)  | 99(3)  | -45(2) | -21(2) | -9(2)  |
| C(32)  | 65(2) | 91(2)  | 92(2)  | -37(2) | -24(2) | -8(2)  |
| C(33)  | 82(3) | 94(3)  | 124(3) | -60(2) | -23(2) | -19(3) |
| C(34)  | 67(2) | 108(3) | 78(2)  | -51(2) | -21(2) | 0(2)   |
| O(1')  | 89(4) | 88(4)  | 100(4) | -26(3) | -15(4) | -15(3) |
| C(31') | 66(4) | 89(5)  | 72(4)  | -19(4) | -21(4) | -14(4) |
| C(32') | 59(4) | 93(4)  | 77(4)  | -22(4) | -13(4) | -2(3)  |
| C(33') | 79(4) | 96(4)  | 92(4)  | -36(4) | -13(4) | -7(4)  |
| C(34') | 72(4) | 84(5)  | 113(4) | -42(4) | -20(4) | -15(4) |
| Ge(1)  | 17(1) | 17(1)  | 17(1)  | -6(1)  | -3(1)  | -1(1)  |
| N(1)   | 18(1) | 22(1)  | 18(1)  | -6(1)  | -5(1)  | -2(1)  |
| N(2)   | 17(1) | 21(1)  | 18(1)  | -5(1)  | -4(1)  | 0(1)   |
| N(3)   | 20(1) | 19(1)  | 20(1)  | -6(1)  | 0(1)   | -4(1)  |
| N(4)   | 24(1) | 20(1)  | 26(1)  | -6(1)  | -5(1)  | -2(1)  |

---

# Crystal data and structure refinement of compound L<sub>2</sub>Ge

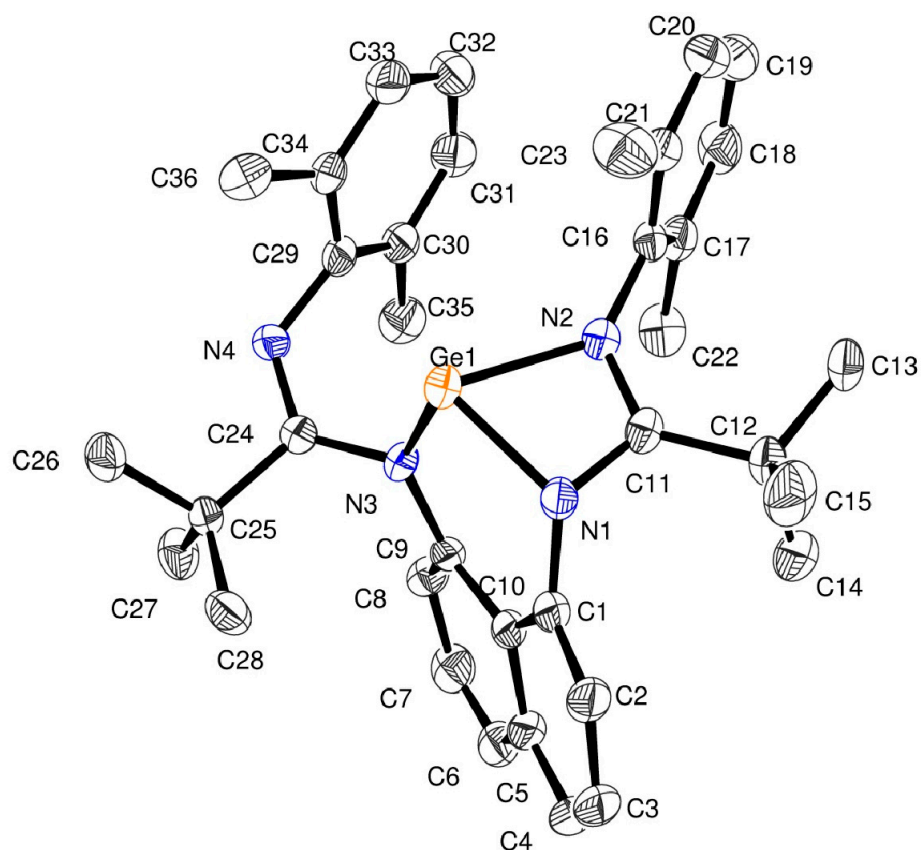

Figure S7. Asymmetric Unit

Table S17. Crystal data and structure refinement for R109.

|                             |                                                   |                        |
|-----------------------------|---------------------------------------------------|------------------------|
| Identification code         | R109                                              |                        |
| Empirical formula           | C <sub>36</sub> H <sub>42</sub> Ge N <sub>4</sub> |                        |
| Formula weight              | 603.35                                            |                        |
| Temperature                 | 193 (2) K                                         |                        |
| Wavelength                  | 0.71073 Å                                         |                        |
| Crystal system, space group | Monoclinic, P 2 <sub>1</sub> /n                   |                        |
| Unit cell dimensions        | a = 10.879 (2) Å                                  | alpha = 90 deg.        |
|                             | b = 14.307 (2) Å                                  | beta = 97.332 (6) deg. |
|                             | c = 20.235 (4) Å                                  | gamma = 90 deg.        |
| Volume                      | 3123.7 (10) Å <sup>3</sup>                        |                        |

|                                   |                                             |
|-----------------------------------|---------------------------------------------|
| Z, Calculated density             | 4, 1.283 Mg/m <sup>3</sup>                  |
| Absorption coefficient            | 1.011 mm <sup>-1</sup>                      |
| F(000)                            | 1272                                        |
| Crystal size                      | 0.180 x 0.040 x 0.010 mm                    |
| Theta range for data collection   | 1.748 to 24.129 deg.                        |
| Limiting indices                  | -12<=h<=12, -14<=k<=16,<br>-23<=l<=23       |
| Reflections collected / unique    | 56977 / 4948 [R(int) = 0.1415]              |
| Completeness to theta = 24.129    | 99.2 %                                      |
| Refinement method                 | Full-matrix least-squares on F <sup>2</sup> |
| Data / restraints / parameters    | 4948 / 0 / 380                              |
| Goodness-of-fit on F <sup>2</sup> | 1.051                                       |
| Final R indices [I>2sigma(I)]     | R1 = 0.0485, wR2 = 0.1040                   |
| R indices (all data)              | R1 = 0.0920, wR2 = 0.1230                   |
| Largest diff. peak and hole       | 0.527 and -0.577 e.A <sup>-3</sup>          |

Table S18. Atomic coordinates ( $\times 10^4$ ) and equivalent isotropic displacement parameters ( $\text{\AA}^2 \times 10^3$ ) for R109.  
 $U(\text{eq})$  is defined as one third of the trace of the orthogonalized  $U_{ij}$  tensor.

|       | x        | y       | z       | U(eq) |
|-------|----------|---------|---------|-------|
| C(1)  | 8505(4)  | 5352(3) | 1746(2) | 28(1) |
| C(2)  | 9492(4)  | 5021(3) | 1465(2) | 35(1) |
| C(3)  | 9754(4)  | 5372(3) | 855(2)  | 44(1) |
| C(4)  | 9044(4)  | 6073(3) | 543(2)  | 44(1) |
| C(5)  | 7952(4)  | 6386(3) | 786(2)  | 34(1) |
| C(6)  | 7179(4)  | 7072(3) | 447(2)  | 38(1) |
| C(7)  | 6102(5)  | 7309(3) | 666(2)  | 39(1) |
| C(8)  | 5718(4)  | 6860(3) | 1216(2) | 30(1) |
| C(9)  | 6409(4)  | 6167(3) | 1556(2) | 24(1) |
| C(10) | 7623(4)  | 5967(3) | 1382(2) | 28(1) |
| C(11) | 8690(4)  | 5728(3) | 2941(2) | 25(1) |
| C(12) | 10019(4) | 6107(3) | 3089(2) | 31(1) |
| C(13) | 10277(4) | 6598(3) | 3770(2) | 40(1) |
| C(14) | 10290(4) | 6810(3) | 2554(2) | 44(1) |
| C(15) | 10897(4) | 5256(3) | 3106(3) | 49(1) |
| C(16) | 7704(4)  | 6242(3) | 3925(2) | 25(1) |
| C(17) | 7389(4)  | 7194(3) | 3923(2) | 31(1) |
| C(18) | 7273(4)  | 7612(3) | 4527(2) | 40(1) |
| C(19) | 7448(4)  | 7109(3) | 5113(2) | 45(1) |
| C(20) | 7739(4)  | 6171(3) | 5105(2) | 41(1) |
| C(21) | 7852(4)  | 5718(3) | 4507(2) | 31(1) |
| C(22) | 7182(4)  | 7739(3) | 3283(2) | 40(1) |
| C(23) | 8152(5)  | 4689(3) | 4498(2) | 48(1) |
| C(24) | 4593(4)  | 5390(2) | 1884(2) | 21(1) |
| C(25) | 4093(4)  | 4904(3) | 1212(2) | 26(1) |
| C(26) | 3245(4)  | 4092(3) | 1381(2) | 38(1) |
| C(27) | 3282(4)  | 5564(3) | 745(2)  | 38(1) |
| C(28) | 5124(4)  | 4488(3) | 856(2)  | 37(1) |
| C(29) | 4105(4)  | 5776(3) | 2966(2) | 28(1) |
| C(30) | 4070(4)  | 6748(3) | 3095(2) | 31(1) |
| C(31) | 4200(4)  | 7034(3) | 3752(2) | 40(1) |
| C(32) | 4357(4)  | 6419(4) | 4276(2) | 43(1) |
| C(33) | 4339(4)  | 5459(3) | 4141(2) | 38(1) |
| C(34) | 4187(4)  | 5125(3) | 3489(2) | 29(1) |
| C(35) | 3853(4)  | 7445(3) | 2541(2) | 42(1) |
| C(36) | 4033(4)  | 4092(3) | 3363(2) | 41(1) |
| N(1)  | 8322(3)  | 5144(2) | 2415(2) | 26(1) |
| N(2)  | 7773(3)  | 5801(2) | 3298(2) | 24(1) |
| N(3)  | 5867(3)  | 5612(2) | 2030(2) | 24(1) |
| N(4)  | 3822(3)  | 5429(2) | 2308(2) | 26(1) |
| Ge(1) | 6714(1)  | 4836(1) | 2710(1) | 25(1) |

Table S19. Bond lengths [Å] and angles [deg] for R109.

---

|              |          |
|--------------|----------|
| C(1)-C(2)    | 1.362(6) |
| C(1)-N(1)    | 1.424(5) |
| C(1)-C(10)   | 1.435(6) |
| C(2)-C(3)    | 1.396(6) |
| C(2)-H(2)    | 0.9500   |
| C(3)-C(4)    | 1.370(6) |
| C(3)-H(3)    | 0.9500   |
| C(4)-C(5)    | 1.416(6) |
| C(4)-H(4)    | 0.9500   |
| C(5)-C(6)    | 1.411(6) |
| C(5)-C(10)   | 1.431(6) |
| C(6)-C(7)    | 1.349(6) |
| C(6)-H(6)    | 0.9500   |
| C(7)-C(8)    | 1.395(6) |
| C(7)-H(7)    | 0.9500   |
| C(8)-C(9)    | 1.375(5) |
| C(8)-H(8)    | 0.9500   |
| C(9)-N(3)    | 1.428(5) |
| C(9)-C(10)   | 1.439(5) |
| C(11)-N(2)   | 1.308(5) |
| C(11)-N(1)   | 1.374(5) |
| C(11)-C(12)  | 1.537(5) |
| C(12)-C(14)  | 1.534(6) |
| C(12)-C(13)  | 1.541(5) |
| C(12)-C(15)  | 1.545(6) |
| C(13)-H(13A) | 0.9800   |
| C(13)-H(13B) | 0.9800   |
| C(13)-H(13C) | 0.9800   |
| C(14)-H(14A) | 0.9800   |
| C(14)-H(14B) | 0.9800   |
| C(14)-H(14C) | 0.9800   |
| C(15)-H(15A) | 0.9800   |
| C(15)-H(15B) | 0.9800   |
| C(15)-H(15C) | 0.9800   |
| C(16)-C(21)  | 1.388(5) |
| C(16)-C(17)  | 1.404(5) |
| C(16)-N(2)   | 1.427(5) |
| C(17)-C(18)  | 1.381(6) |
| C(17)-C(22)  | 1.503(6) |
| C(18)-C(19)  | 1.379(6) |
| C(18)-H(18)  | 0.9500   |
| C(19)-C(20)  | 1.380(6) |
| C(19)-H(19)  | 0.9500   |
| C(20)-C(21)  | 1.392(6) |
| C(20)-H(20)  | 0.9500   |
| C(21)-C(23)  | 1.508(6) |
| C(22)-H(22A) | 0.9800   |
| C(22)-H(22B) | 0.9800   |
| C(22)-H(22C) | 0.9800   |
| C(23)-H(23A) | 0.9800   |
| C(23)-H(23B) | 0.9800   |

|                   |          |
|-------------------|----------|
| C(23) -H(23C)     | 0.9800   |
| C(24) -N(4)       | 1.275(5) |
| C(24) -N(3)       | 1.417(5) |
| C(24) -C(25)      | 1.561(5) |
| C(25) -C(28)      | 1.530(6) |
| C(25) -C(27)      | 1.532(6) |
| C(25) -C(26)      | 1.548(5) |
| C(26) -H(26A)     | 0.9800   |
| C(26) -H(26B)     | 0.9800   |
| C(26) -H(26C)     | 0.9800   |
| C(27) -H(27A)     | 0.9800   |
| C(27) -H(27B)     | 0.9800   |
| C(27) -H(27C)     | 0.9800   |
| C(28) -H(28A)     | 0.9800   |
| C(28) -H(28B)     | 0.9800   |
| C(28) -H(28C)     | 0.9800   |
| C(29) -C(34)      | 1.403(6) |
| C(29) -C(30)      | 1.417(6) |
| C(29) -N(4)       | 1.417(5) |
| C(30) -C(31)      | 1.380(6) |
| C(30) -C(35)      | 1.497(6) |
| C(31) -C(32)      | 1.372(6) |
| C(31) -H(31)      | 0.9500   |
| C(32) -C(33)      | 1.400(6) |
| C(32) -H(32)      | 0.9500   |
| C(33) -C(34)      | 1.392(6) |
| C(33) -H(33)      | 0.9500   |
| C(34) -C(36)      | 1.506(6) |
| C(35) -H(35A)     | 0.9800   |
| C(35) -H(35B)     | 0.9800   |
| C(35) -H(35C)     | 0.9800   |
| C(36) -H(36A)     | 0.9800   |
| C(36) -H(36B)     | 0.9800   |
| C(36) -H(36C)     | 0.9800   |
| N(1) -Ge(1)       | 1.969(3) |
| N(2) -Ge(1)       | 2.073(3) |
| N(3) -Ge(1)       | 1.912(3) |
|                   |          |
| C(2) -C(1) -N(1)  | 122.5(4) |
| C(2) -C(1) -C(10) | 120.6(4) |
| N(1) -C(1) -C(10) | 116.9(4) |
| C(1) -C(2) -C(3)  | 120.4(4) |
| C(1) -C(2) -H(2)  | 119.8    |
| C(3) -C(2) -H(2)  | 119.8    |
| C(4) -C(3) -C(2)  | 120.3(4) |
| C(4) -C(3) -H(3)  | 119.9    |
| C(2) -C(3) -H(3)  | 119.9    |
| C(3) -C(4) -C(5)  | 121.4(4) |
| C(3) -C(4) -H(4)  | 119.3    |
| C(5) -C(4) -H(4)  | 119.3    |
| C(6) -C(5) -C(4)  | 121.6(4) |
| C(6) -C(5) -C(10) | 120.2(4) |
| C(4) -C(5) -C(10) | 118.1(4) |
| C(7) -C(6) -C(5)  | 120.2(4) |



|                     |          |
|---------------------|----------|
| C(7)-C(6)-H(6)      | 119.9    |
| C(5)-C(6)-H(6)      | 119.9    |
| C(6)-C(7)-C(8)      | 120.5(4) |
| C(6)-C(7)-H(7)      | 119.7    |
| C(8)-C(7)-H(7)      | 119.7    |
| C(9)-C(8)-C(7)      | 122.1(4) |
| C(9)-C(8)-H(8)      | 118.9    |
| C(7)-C(8)-H(8)      | 118.9    |
| C(8)-C(9)-N(3)      | 119.4(4) |
| C(8)-C(9)-C(10)     | 118.7(4) |
| N(3)-C(9)-C(10)     | 121.7(3) |
| C(5)-C(10)-C(1)     | 117.9(4) |
| C(5)-C(10)-C(9)     | 117.4(4) |
| C(1)-C(10)-C(9)     | 124.7(4) |
| N(2)-C(11)-N(1)     | 108.0(3) |
| N(2)-C(11)-C(12)    | 129.0(4) |
| N(1)-C(11)-C(12)    | 122.6(4) |
| C(14)-C(12)-C(11)   | 110.7(3) |
| C(14)-C(12)-C(13)   | 107.6(3) |
| C(11)-C(12)-C(13)   | 113.2(3) |
| C(14)-C(12)-C(15)   | 111.0(4) |
| C(11)-C(12)-C(15)   | 106.9(3) |
| C(13)-C(12)-C(15)   | 107.4(4) |
| C(12)-C(13)-H(13A)  | 109.5    |
| C(12)-C(13)-H(13B)  | 109.5    |
| H(13A)-C(13)-H(13B) | 109.5    |
| C(12)-C(13)-H(13C)  | 109.5    |
| H(13A)-C(13)-H(13C) | 109.5    |
| H(13B)-C(13)-H(13C) | 109.5    |
| C(12)-C(14)-H(14A)  | 109.5    |
| C(12)-C(14)-H(14B)  | 109.5    |
| H(14A)-C(14)-H(14B) | 109.5    |
| C(12)-C(14)-H(14C)  | 109.5    |
| H(14A)-C(14)-H(14C) | 109.5    |
| H(14B)-C(14)-H(14C) | 109.5    |
| C(12)-C(15)-H(15A)  | 109.5    |
| C(12)-C(15)-H(15B)  | 109.5    |
| H(15A)-C(15)-H(15B) | 109.5    |
| C(12)-C(15)-H(15C)  | 109.5    |
| H(15A)-C(15)-H(15C) | 109.5    |
| H(15B)-C(15)-H(15C) | 109.5    |
| C(21)-C(16)-C(17)   | 121.9(4) |
| C(21)-C(16)-N(2)    | 120.1(3) |
| C(17)-C(16)-N(2)    | 117.8(3) |
| C(18)-C(17)-C(16)   | 117.9(4) |
| C(18)-C(17)-C(22)   | 121.1(4) |
| C(16)-C(17)-C(22)   | 121.0(4) |
| C(19)-C(18)-C(17)   | 121.1(4) |
| C(19)-C(18)-H(18)   | 119.5    |
| C(17)-C(18)-H(18)   | 119.5    |
| C(18)-C(19)-C(20)   | 120.3(4) |
| C(18)-C(19)-H(19)   | 119.8    |
| C(20)-C(19)-H(19)   | 119.8    |
| C(19)-C(20)-C(21)   | 120.6(4) |

|                         |           |
|-------------------------|-----------|
| C(19) - C(20) - H(20)   | 119.7     |
| C(21) - C(20) - H(20)   | 119.7     |
| C(16) - C(21) - C(20)   | 118.2 (4) |
| C(16) - C(21) - C(23)   | 121.3 (4) |
| C(20) - C(21) - C(23)   | 120.5 (4) |
| C(17) - C(22) - H(22A)  | 109.5     |
| C(17) - C(22) - H(22B)  | 109.5     |
| H(22A) - C(22) - H(22B) | 109.5     |
| C(17) - C(22) - H(22C)  | 109.5     |
| H(22A) - C(22) - H(22C) | 109.5     |
| H(22B) - C(22) - H(22C) | 109.5     |
| C(21) - C(23) - H(23A)  | 109.5     |
| C(21) - C(23) - H(23B)  | 109.5     |
| H(23A) - C(23) - H(23B) | 109.5     |
| C(21) - C(23) - H(23C)  | 109.5     |
| H(23A) - C(23) - H(23C) | 109.5     |
| H(23B) - C(23) - H(23C) | 109.5     |
| N(4) - C(24) - N(3)     | 124.0 (3) |
| N(4) - C(24) - C(25)    | 114.8 (3) |
| N(3) - C(24) - C(25)    | 120.3 (3) |
| C(28) - C(25) - C(27)   | 110.4 (3) |
| C(28) - C(25) - C(26)   | 107.8 (3) |
| C(27) - C(25) - C(26)   | 106.6 (3) |
| C(28) - C(25) - C(24)   | 112.8 (3) |
| C(27) - C(25) - C(24)   | 111.8 (3) |
| C(26) - C(25) - C(24)   | 107.0 (3) |
| C(25) - C(26) - H(26A)  | 109.5     |
| C(25) - C(26) - H(26B)  | 109.5     |
| H(26A) - C(26) - H(26B) | 109.5     |
| C(25) - C(26) - H(26C)  | 109.5     |
| H(26A) - C(26) - H(26C) | 109.5     |
| H(26B) - C(26) - H(26C) | 109.5     |
| C(25) - C(27) - H(27A)  | 109.5     |
| C(25) - C(27) - H(27B)  | 109.5     |
| H(27A) - C(27) - H(27B) | 109.5     |
| C(25) - C(27) - H(27C)  | 109.5     |
| H(27A) - C(27) - H(27C) | 109.5     |
| H(27B) - C(27) - H(27C) | 109.5     |
| C(25) - C(28) - H(28A)  | 109.5     |
| C(25) - C(28) - H(28B)  | 109.5     |
| H(28A) - C(28) - H(28B) | 109.5     |
| C(25) - C(28) - H(28C)  | 109.5     |
| H(28A) - C(28) - H(28C) | 109.5     |
| H(28B) - C(28) - H(28C) | 109.5     |
| C(34) - C(29) - C(30)   | 120.8 (4) |
| C(34) - C(29) - N(4)    | 117.5 (4) |
| C(30) - C(29) - N(4)    | 120.6 (4) |
| C(31) - C(30) - C(29)   | 117.8 (4) |
| C(31) - C(30) - C(35)   | 120.7 (4) |
| C(29) - C(30) - C(35)   | 121.4 (4) |
| C(32) - C(31) - C(30)   | 122.8 (4) |
| C(32) - C(31) - H(31)   | 118.6     |
| C(30) - C(31) - H(31)   | 118.6     |
| C(31) - C(32) - C(33)   | 118.7 (4) |

|                     |            |
|---------------------|------------|
| C(31)-C(32)-H(32)   | 120.6      |
| C(33)-C(32)-H(32)   | 120.6      |
| C(34)-C(33)-C(32)   | 121.2(4)   |
| C(34)-C(33)-H(33)   | 119.4      |
| C(32)-C(33)-H(33)   | 119.4      |
| C(33)-C(34)-C(29)   | 118.4(4)   |
| C(33)-C(34)-C(36)   | 119.6(4)   |
| C(29)-C(34)-C(36)   | 121.9(4)   |
| C(30)-C(35)-H(35A)  | 109.5      |
| C(30)-C(35)-H(35B)  | 109.5      |
| H(35A)-C(35)-H(35B) | 109.5      |
| C(30)-C(35)-H(35C)  | 109.5      |
| H(35A)-C(35)-H(35C) | 109.5      |
| H(35B)-C(35)-H(35C) | 109.5      |
| C(34)-C(36)-H(36A)  | 109.5      |
| C(34)-C(36)-H(36B)  | 109.5      |
| H(36A)-C(36)-H(36B) | 109.5      |
| C(34)-C(36)-H(36C)  | 109.5      |
| H(36A)-C(36)-H(36C) | 109.5      |
| H(36B)-C(36)-H(36C) | 109.5      |
| C(11)-N(1)-C(1)     | 123.2(3)   |
| C(11)-N(1)-Ge(1)    | 94.7(2)    |
| C(1)-N(1)-Ge(1)     | 125.0(3)   |
| C(11)-N(2)-C(16)    | 131.0(3)   |
| C(11)-N(2)-Ge(1)    | 92.1(2)    |
| C(16)-N(2)-Ge(1)    | 135.7(3)   |
| C(24)-N(3)-C(9)     | 117.5(3)   |
| C(24)-N(3)-Ge(1)    | 112.9(2)   |
| C(9)-N(3)-Ge(1)     | 127.1(3)   |
| C(24)-N(4)-C(29)    | 124.4(3)   |
| N(3)-Ge(1)-N(1)     | 90.95(13)  |
| N(3)-Ge(1)-N(2)     | 102.00(13) |
| N(1)-Ge(1)-N(2)     | 64.89(13)  |

---

Symmetry transformations used to generate equivalent atoms:

Table S20. Anisotropic displacement parameters ( $\text{\AA}^2 \times 10^3$ ) for R109. The anisotropic displacement factor exponent takes the form:  $-2 \pi^2 [ h^2 a^{*2} U_{11} + \dots + 2 h k a^* b^* U_{12} ]$

|       | U11   | U22   | U33   | U23    | U13   | U12    |
|-------|-------|-------|-------|--------|-------|--------|
| C(1)  | 27(3) | 29(3) | 28(2) | -7(2)  | 5(2)  | -6(2)  |
| C(2)  | 28(3) | 37(3) | 42(3) | -16(2) | 13(2) | -4(2)  |
| C(3)  | 31(3) | 60(4) | 44(3) | -21(3) | 19(2) | -10(3) |
| C(4)  | 40(3) | 58(3) | 38(3) | -12(3) | 19(2) | -18(3) |
| C(5)  | 36(3) | 37(3) | 32(3) | -8(2)  | 12(2) | -15(2) |
| C(6)  | 44(3) | 37(3) | 33(3) | 5(2)   | 4(2)  | -14(2) |
| C(7)  | 48(3) | 27(3) | 42(3) | 3(2)   | 4(3)  | -8(2)  |
| C(8)  | 33(3) | 22(2) | 35(3) | 1(2)   | 10(2) | -1(2)  |
| C(9)  | 27(3) | 23(2) | 21(2) | -4(2)  | 6(2)  | -6(2)  |
| C(10) | 28(3) | 28(2) | 30(2) | -12(2) | 8(2)  | -8(2)  |
| C(11) | 20(2) | 22(2) | 32(2) | 5(2)   | 0(2)  | 1(2)   |
| C(12) | 21(3) | 35(3) | 35(3) | -2(2)  | -1(2) | -3(2)  |
| C(13) | 26(3) | 51(3) | 40(3) | 0(2)   | -3(2) | -12(2) |
| C(14) | 43(3) | 45(3) | 46(3) | -3(2)  | 11(2) | -20(2) |
| C(15) | 26(3) | 57(3) | 64(3) | -4(3)  | 2(2)  | 8(2)   |
| C(16) | 23(3) | 27(2) | 26(2) | -5(2)  | 2(2)  | -6(2)  |
| C(17) | 28(3) | 27(2) | 38(3) | -3(2)  | 5(2)  | -4(2)  |
| C(18) | 44(3) | 28(3) | 48(3) | -13(2) | 7(2)  | -8(2)  |
| C(19) | 52(3) | 45(3) | 39(3) | -17(3) | 14(2) | -15(2) |
| C(20) | 46(3) | 49(3) | 27(3) | 0(2)   | 4(2)  | -15(2) |
| C(21) | 30(3) | 34(3) | 29(3) | 1(2)   | 4(2)  | -6(2)  |
| C(22) | 40(3) | 31(3) | 47(3) | 3(2)   | -1(2) | 4(2)   |
| C(23) | 64(4) | 39(3) | 40(3) | 11(2)  | 2(3)  | 4(3)   |
| C(24) | 26(2) | 14(2) | 24(2) | 2(2)   | 3(2)  | 1(2)   |
| C(25) | 26(2) | 29(2) | 23(2) | -2(2)  | 0(2)  | -6(2)  |
| C(26) | 46(3) | 31(3) | 36(3) | -4(2)  | 3(2)  | -12(2) |
| C(27) | 35(3) | 37(3) | 37(3) | 4(2)   | -9(2) | -3(2)  |
| C(28) | 35(3) | 44(3) | 30(3) | -12(2) | 2(2)  | 1(2)   |
| C(29) | 17(2) | 35(3) | 31(2) | -3(2)  | 4(2)  | -3(2)  |
| C(30) | 19(3) | 40(3) | 33(3) | -4(2)  | 5(2)  | 0(2)   |
| C(31) | 35(3) | 42(3) | 45(3) | -13(2) | 14(2) | 0(2)   |
| C(32) | 35(3) | 61(4) | 34(3) | -11(3) | 4(2)  | -5(2)  |
| C(33) | 29(3) | 53(3) | 33(3) | 4(2)   | 2(2)  | -4(2)  |
| C(34) | 18(2) | 38(3) | 31(2) | -1(2)  | 3(2)  | -3(2)  |
| C(35) | 40(3) | 38(3) | 49(3) | -3(2)  | 11(2) | 1(2)   |
| C(36) | 43(3) | 43(3) | 39(3) | 5(2)   | 11(2) | -4(2)  |
| N(1)  | 21(2) | 26(2) | 29(2) | -5(2)  | 3(2)  | -2(2)  |
| N(2)  | 22(2) | 22(2) | 27(2) | 2(2)   | 2(2)  | 1(2)   |
| N(3)  | 18(2) | 25(2) | 28(2) | 0(2)   | 4(2)  | -2(2)  |
| N(4)  | 23(2) | 31(2) | 23(2) | -2(2)  | 4(2)  | -1(2)  |
| Ge(1) | 22(1) | 23(1) | 31(1) | 0(1)   | 2(1)  | -2(1)  |

## Crystal data and structure refinement of compound 1a

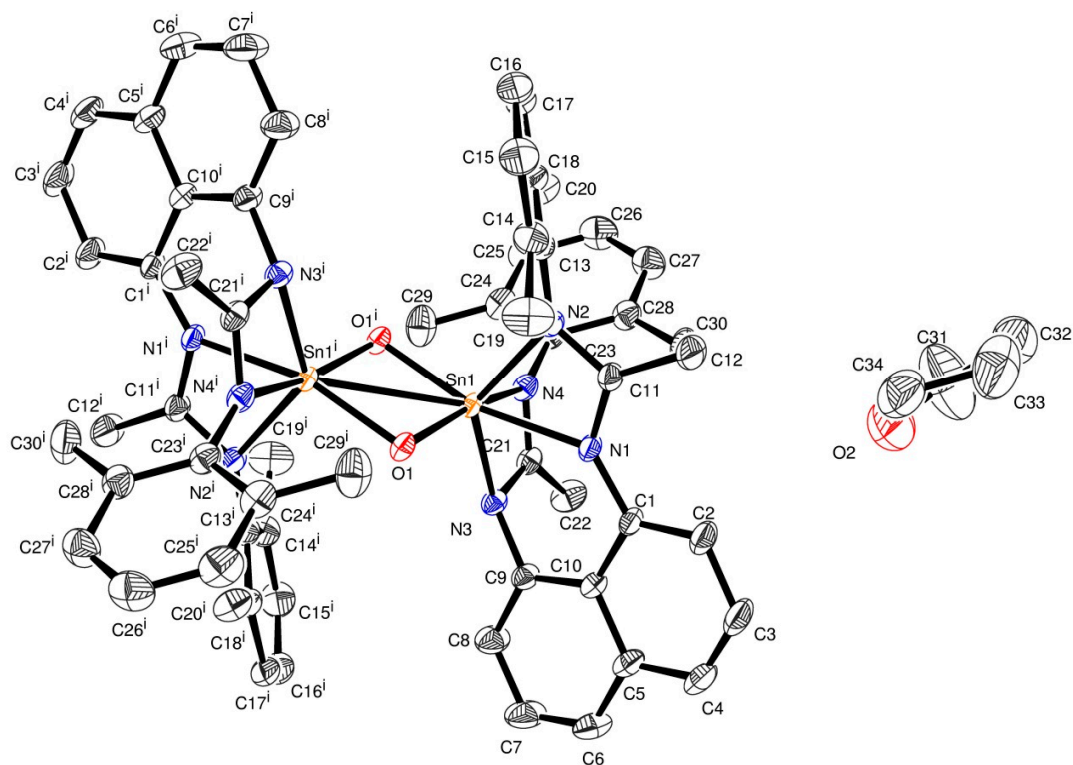

Figure S8. Asymmetric Unit

Table S21. Crystal data and structure refinement for R126.

|                             |                                                                                                                    |                        |
|-----------------------------|--------------------------------------------------------------------------------------------------------------------|------------------------|
| Identification code         | R126                                                                                                               |                        |
| Empirical formula           | C <sub>60</sub> H <sub>60</sub> N <sub>8</sub> O <sub>2</sub> Sn <sub>2</sub> , 2(C <sub>4</sub> H <sub>8</sub> O) |                        |
| Formula weight              | 1306.79                                                                                                            |                        |
| Temperature                 | 193(2) K                                                                                                           |                        |
| Wavelength                  | 0.71073 Å                                                                                                          |                        |
| Crystal system, space group | Triclinic, P -1                                                                                                    |                        |
| Unit cell dimensions        | a = 11.0951(5) Å                                                                                                   | alpha = 88.337(2) deg. |
|                             | b = 11.8481(6) Å                                                                                                   | beta = 88.326(2) deg.  |
|                             | c = 12.8106(6) Å                                                                                                   | gamma = 65.647(2) deg. |
| Volume                      | 1533.27(13) Å <sup>3</sup>                                                                                         |                        |
| Z, Calculated density       | 1, 1.415 Mg/m <sup>3</sup>                                                                                         |                        |
| Absorption coefficient      | 0.870 mm <sup>-1</sup>                                                                                             |                        |

|                                   |                                             |
|-----------------------------------|---------------------------------------------|
| F(000)                            | 672                                         |
| Crystal size                      | 0.120 x 0.120 x 0.080 mm                    |
| Theta range for data collection   | 3.182 to 36.438 deg.                        |
| Limiting indices                  | -18<=h<=18, -19<=k<=19,<br>-21<=l<=21       |
| Reflections collected / unique    | 122943 / 14935 [R(int) = 0.0430]            |
| Completeness to theta = 25.242    | 99.7 %                                      |
| Refinement method                 | Full-matrix least-squares on F <sup>2</sup> |
| Data / restraints / parameters    | 14935 / 0 / 376                             |
| Goodness-of-fit on F <sup>2</sup> | 1.061                                       |
| Final R indices [I>2sigma(I)]     | R1 = 0.0272, wR2 = 0.0652                   |
| R indices (all data)              | R1 = 0.0361, wR2 = 0.0703                   |
| Largest diff. peak and hole       | 1.016 and -0.944 e.A <sup>-3</sup>          |

Table S22. Atomic coordinates ( $\times 10^4$ ) and equivalent isotropic displacement parameters ( $\text{\AA}^2 \times 10^3$ ) for R126.  
 $U(\text{eq})$  is defined as one third of the trace of the orthogonalized  $U_{ij}$  tensor.

|       | x        | y       | z        | U(eq)  |
|-------|----------|---------|----------|--------|
| C(1)  | 1225(1)  | 5332(1) | 8431(1)  | 22(1)  |
| C(2)  | 581(1)   | 4715(2) | 7943(1)  | 33(1)  |
| C(3)  | -758(2)  | 4974(2) | 8162(2)  | 38(1)  |
| C(4)  | -1470(1) | 5842(2) | 8865(1)  | 34(1)  |
| C(5)  | -884(1)  | 6531(1) | 9367(1)  | 28(1)  |
| C(6)  | -1641(2) | 7429(2) | 10105(2) | 38(1)  |
| C(7)  | -1111(2) | 8092(2) | 10630(2) | 43(1)  |
| C(8)  | 205(2)   | 7926(2) | 10406(1) | 34(1)  |
| C(9)  | 961(1)   | 7097(1) | 9665(1)  | 23(1)  |
| C(10) | 470(1)   | 6319(1) | 9142(1)  | 22(1)  |
| C(11) | 3519(1)  | 4161(1) | 7727(1)  | 24(1)  |
| C(12) | 3330(2)  | 3412(2) | 6877(2)  | 46(1)  |
| C(13) | 5954(1)  | 3202(1) | 7614(1)  | 24(1)  |
| C(14) | 6330(2)  | 1970(1) | 7966(1)  | 31(1)  |
| C(15) | 7575(2)  | 1088(2) | 7666(1)  | 37(1)  |
| C(16) | 8441(2)  | 1419(2) | 7069(1)  | 36(1)  |
| C(17) | 8087(1)  | 2646(2) | 6775(1)  | 31(1)  |
| C(18) | 6842(1)  | 3554(1) | 7034(1)  | 25(1)  |
| C(19) | 5448(2)  | 1609(2) | 8691(2)  | 47(1)  |
| C(20) | 6454(2)  | 4881(2) | 6702(2)  | 35(1)  |
| C(21) | 2328(1)  | 7708(1) | 8523(1)  | 22(1)  |
| C(22) | 1220(2)  | 8870(1) | 8143(1)  | 34(1)  |
| C(23) | 3877(1)  | 7715(1) | 7170(1)  | 23(1)  |
| C(24) | 4677(2)  | 8352(1) | 7317(1)  | 29(1)  |
| C(25) | 5098(2)  | 8821(2) | 6435(2)  | 39(1)  |
| C(26) | 4741(2)  | 8659(2) | 5440(2)  | 41(1)  |
| C(27) | 3956(2)  | 8027(2) | 5305(1)  | 36(1)  |
| C(28) | 3512(1)  | 7541(1) | 6167(1)  | 28(1)  |
| C(29) | 5065(2)  | 8512(2) | 8401(2)  | 41(1)  |
| C(30) | 2698(2)  | 6815(2) | 6002(1)  | 41(1)  |
| C(31) | 853(6)   | 3423(4) | 4475(3)  | 112(2) |
| C(32) | 1106(3)  | 2388(3) | 3786(2)  | 74(1)  |
| C(33) | 1235(3)  | 1337(3) | 4558(3)  | 86(1)  |
| C(34) | 1539(3)  | 1780(3) | 5565(2)  | 65(1)  |
| N(1)  | 2600(1)  | 4968(1) | 8340(1)  | 21(1)  |
| N(2)  | 4712(1)  | 4140(1) | 7914(1)  | 23(1)  |
| N(3)  | 2221(1)  | 7087(1) | 9390(1)  | 20(1)  |
| N(4)  | 3484(1)  | 7180(1) | 8050(1)  | 22(1)  |
| O(1)  | 4297(1)  | 4403(1) | 10413(1) | 20(1)  |
| O(2)  | 883(2)   | 3071(2) | 5526(2)  | 72(1)  |
| Sn(1) | 4040(1)  | 5497(1) | 9137(1)  | 16(1)  |

Table S23. Bond lengths [Å] and angles [deg] for R126

---

|              |            |
|--------------|------------|
| C(1)-C(2)    | 1.3849(18) |
| C(1)-N(1)    | 1.4063(16) |
| C(1)-C(10)   | 1.4515(18) |
| C(2)-C(3)    | 1.409(2)   |
| C(2)-H(2)    | 0.9500     |
| C(3)-C(4)    | 1.354(3)   |
| C(3)-H(3)    | 0.9500     |
| C(4)-C(5)    | 1.414(2)   |
| C(4)-H(4)    | 0.9500     |
| C(5)-C(6)    | 1.417(2)   |
| C(5)-C(10)   | 1.4388(18) |
| C(6)-C(7)    | 1.361(3)   |
| C(6)-H(6)    | 0.9500     |
| C(7)-C(8)    | 1.412(2)   |
| C(7)-H(7)    | 0.9500     |
| C(8)-C(9)    | 1.3772(19) |
| C(8)-H(8)    | 0.9500     |
| C(9)-N(3)    | 1.4267(16) |
| C(9)-C(10)   | 1.4371(18) |
| C(11)-N(1)   | 1.3285(16) |
| C(11)-N(2)   | 1.3415(16) |
| C(11)-C(12)  | 1.497(2)   |
| C(11)-Sn(1)  | 2.6612(12) |
| C(12)-H(12A) | 0.9800     |
| C(12)-H(12B) | 0.9800     |
| C(12)-H(12C) | 0.9800     |
| C(13)-C(18)  | 1.405(2)   |
| C(13)-C(14)  | 1.407(2)   |
| C(13)-N(2)   | 1.4186(16) |
| C(14)-C(15)  | 1.397(2)   |
| C(14)-C(19)  | 1.508(3)   |
| C(15)-C(16)  | 1.383(3)   |
| C(15)-H(15)  | 0.9500     |
| C(16)-C(17)  | 1.383(2)   |
| C(16)-H(16)  | 0.9500     |
| C(17)-C(18)  | 1.3949(19) |
| C(17)-H(17)  | 0.9500     |
| C(18)-C(20)  | 1.501(2)   |
| C(19)-H(19A) | 0.9800     |
| C(19)-H(19B) | 0.9800     |
| C(19)-H(19C) | 0.9800     |
| C(20)-H(20A) | 0.9800     |
| C(20)-H(20B) | 0.9800     |
| C(20)-H(20C) | 0.9800     |
| C(21)-N(4)   | 1.3113(17) |
| C(21)-N(3)   | 1.3439(17) |
| C(21)-C(22)  | 1.4978(18) |
| C(21)-Sn(1)  | 2.6374(12) |
| C(22)-H(22A) | 0.9800     |
| C(22)-H(22B) | 0.9800     |
| C(22)-H(22C) | 0.9800     |



|                     |             |
|---------------------|-------------|
| C(23) - C(24)       | 1.401(2)    |
| C(23) - C(28)       | 1.404(2)    |
| C(23) - N(4)        | 1.4213(17)  |
| C(24) - C(25)       | 1.397(2)    |
| C(24) - C(29)       | 1.505(2)    |
| C(25) - C(26)       | 1.387(3)    |
| C(25) - H(25)       | 0.9500      |
| C(26) - C(27)       | 1.380(3)    |
| C(26) - H(26)       | 0.9500      |
| C(27) - C(28)       | 1.400(2)    |
| C(27) - H(27)       | 0.9500      |
| C(28) - C(30)       | 1.504(2)    |
| C(29) - H(29A)      | 0.9800      |
| C(29) - H(29B)      | 0.9800      |
| C(29) - H(29C)      | 0.9800      |
| C(30) - H(30A)      | 0.9800      |
| C(30) - H(30B)      | 0.9800      |
| C(30) - H(30C)      | 0.9800      |
| C(31) - O(2)        | 1.395(4)    |
| C(31) - C(32)       | 1.458(5)    |
| C(31) - H(31A)      | 0.9900      |
| C(31) - H(31B)      | 0.9900      |
| C(32) - C(33)       | 1.530(5)    |
| C(32) - H(32A)      | 0.9900      |
| C(32) - H(32B)      | 0.9900      |
| C(33) - C(34)       | 1.504(4)    |
| C(33) - H(33A)      | 0.9900      |
| C(33) - H(33B)      | 0.9900      |
| C(34) - O(2)        | 1.397(3)    |
| C(34) - H(34A)      | 0.9900      |
| C(34) - H(34B)      | 0.9900      |
| N(1) - Sn(1)        | 2.2236(10)  |
| N(2) - Sn(1)        | 2.1644(11)  |
| N(3) - Sn(1)        | 2.1423(10)  |
| N(4) - Sn(1)        | 2.2742(10)  |
| O(1) - Sn(1) #1     | 1.9996(8)   |
| O(1) - Sn(1)        | 2.0079(9)   |
| Sn(1) - Sn(1) #1    | 2.97787(19) |
|                     |             |
| C(2) - C(1) - N(1)  | 122.61(12)  |
| C(2) - C(1) - C(10) | 118.62(12)  |
| N(1) - C(1) - C(10) | 118.51(10)  |
| C(1) - C(2) - C(3)  | 121.84(15)  |
| C(1) - C(2) - H(2)  | 119.1       |
| C(3) - C(2) - H(2)  | 119.1       |
| C(4) - C(3) - C(2)  | 120.95(14)  |
| C(4) - C(3) - H(3)  | 119.5       |
| C(2) - C(3) - H(3)  | 119.5       |
| C(3) - C(4) - C(5)  | 120.05(13)  |
| C(3) - C(4) - H(4)  | 120.0       |
| C(5) - C(4) - H(4)  | 120.0       |
| C(4) - C(5) - C(6)  | 119.19(13)  |
| C(4) - C(5) - C(10) | 120.64(14)  |
| C(6) - C(5) - C(10) | 120.16(14)  |

|                     |            |
|---------------------|------------|
| C(7)-C(6)-C(5)      | 121.41(14) |
| C(7)-C(6)-H(6)      | 119.3      |
| C(5)-C(6)-H(6)      | 119.3      |
| C(6)-C(7)-C(8)      | 119.61(15) |
| C(6)-C(7)-H(7)      | 120.2      |
| C(8)-C(7)-H(7)      | 120.2      |
| C(9)-C(8)-C(7)      | 120.89(15) |
| C(9)-C(8)-H(8)      | 119.6      |
| C(7)-C(8)-H(8)      | 119.6      |
| C(8)-C(9)-N(3)      | 117.66(12) |
| C(8)-C(9)-C(10)     | 121.30(12) |
| N(3)-C(9)-C(10)     | 120.95(11) |
| C(9)-C(10)-C(5)     | 116.42(12) |
| C(9)-C(10)-C(1)     | 125.86(11) |
| C(5)-C(10)-C(1)     | 117.71(12) |
| N(1)-C(11)-N(2)     | 110.50(11) |
| N(1)-C(11)-C(12)    | 127.95(12) |
| N(2)-C(11)-C(12)    | 121.42(12) |
| N(1)-C(11)-Sn(1)    | 56.50(6)   |
| N(2)-C(11)-Sn(1)    | 54.00(6)   |
| C(12)-C(11)-Sn(1)   | 174.81(11) |
| C(11)-C(12)-H(12A)  | 109.5      |
| C(11)-C(12)-H(12B)  | 109.5      |
| H(12A)-C(12)-H(12B) | 109.5      |
| C(11)-C(12)-H(12C)  | 109.5      |
| H(12A)-C(12)-H(12C) | 109.5      |
| H(12B)-C(12)-H(12C) | 109.5      |
| C(18)-C(13)-C(14)   | 120.86(12) |
| C(18)-C(13)-N(2)    | 118.26(12) |
| C(14)-C(13)-N(2)    | 120.64(13) |
| C(15)-C(14)-C(13)   | 118.33(15) |
| C(15)-C(14)-C(19)   | 120.20(15) |
| C(13)-C(14)-C(19)   | 121.40(14) |
| C(16)-C(15)-C(14)   | 121.13(15) |
| C(16)-C(15)-H(15)   | 119.4      |
| C(14)-C(15)-H(15)   | 119.4      |
| C(15)-C(16)-C(17)   | 119.94(14) |
| C(15)-C(16)-H(16)   | 120.0      |
| C(17)-C(16)-H(16)   | 120.0      |
| C(16)-C(17)-C(18)   | 120.96(15) |
| C(16)-C(17)-H(17)   | 119.5      |
| C(18)-C(17)-H(17)   | 119.5      |
| C(17)-C(18)-C(13)   | 118.63(13) |
| C(17)-C(18)-C(20)   | 120.86(14) |
| C(13)-C(18)-C(20)   | 120.51(12) |
| C(14)-C(19)-H(19A)  | 109.5      |
| C(14)-C(19)-H(19B)  | 109.5      |
| H(19A)-C(19)-H(19B) | 109.5      |
| C(14)-C(19)-H(19C)  | 109.5      |
| H(19A)-C(19)-H(19C) | 109.5      |
| H(19B)-C(19)-H(19C) | 109.5      |
| C(18)-C(20)-H(20A)  | 109.5      |
| C(18)-C(20)-H(20B)  | 109.5      |
| H(20A)-C(20)-H(20B) | 109.5      |

|                     |            |
|---------------------|------------|
| C(18)-C(20)-H(20C)  | 109.5      |
| H(20A)-C(20)-H(20C) | 109.5      |
| H(20B)-C(20)-H(20C) | 109.5      |
| N(4)-C(21)-N(3)     | 112.95(11) |
| N(4)-C(21)-C(22)    | 124.42(13) |
| N(3)-C(21)-C(22)    | 122.62(12) |
| N(4)-C(21)-Sn(1)    | 59.57(6)   |
| N(3)-C(21)-Sn(1)    | 53.94(6)   |
| C(22)-C(21)-Sn(1)   | 171.30(10) |
| C(21)-C(22)-H(22A)  | 109.5      |
| C(21)-C(22)-H(22B)  | 109.5      |
| H(22A)-C(22)-H(22B) | 109.5      |
| C(21)-C(22)-H(22C)  | 109.5      |
| H(22A)-C(22)-H(22C) | 109.5      |
| H(22B)-C(22)-H(22C) | 109.5      |
| C(24)-C(23)-C(28)   | 121.39(13) |
| C(24)-C(23)-N(4)    | 119.17(12) |
| C(28)-C(23)-N(4)    | 119.36(12) |
| C(25)-C(24)-C(23)   | 118.07(15) |
| C(25)-C(24)-C(29)   | 121.70(15) |
| C(23)-C(24)-C(29)   | 120.23(14) |
| C(26)-C(25)-C(24)   | 121.11(16) |
| C(26)-C(25)-H(25)   | 119.4      |
| C(24)-C(25)-H(25)   | 119.4      |
| C(27)-C(26)-C(25)   | 120.25(15) |
| C(27)-C(26)-H(26)   | 119.9      |
| C(25)-C(26)-H(26)   | 119.9      |
| C(26)-C(27)-C(28)   | 120.55(16) |
| C(26)-C(27)-H(27)   | 119.7      |
| C(28)-C(27)-H(27)   | 119.7      |
| C(27)-C(28)-C(23)   | 118.63(14) |
| C(27)-C(28)-C(30)   | 119.79(14) |
| C(23)-C(28)-C(30)   | 121.55(13) |
| C(24)-C(29)-H(29A)  | 109.5      |
| C(24)-C(29)-H(29B)  | 109.5      |
| H(29A)-C(29)-H(29B) | 109.5      |
| C(24)-C(29)-H(29C)  | 109.5      |
| H(29A)-C(29)-H(29C) | 109.5      |
| H(29B)-C(29)-H(29C) | 109.5      |
| C(28)-C(30)-H(30A)  | 109.5      |
| C(28)-C(30)-H(30B)  | 109.5      |
| H(30A)-C(30)-H(30B) | 109.5      |
| C(28)-C(30)-H(30C)  | 109.5      |
| H(30A)-C(30)-H(30C) | 109.5      |
| H(30B)-C(30)-H(30C) | 109.5      |
| O(2)-C(31)-C(32)    | 112.0(3)   |
| O(2)-C(31)-H(31A)   | 109.2      |
| C(32)-C(31)-H(31A)  | 109.2      |
| O(2)-C(31)-H(31B)   | 109.2      |
| C(32)-C(31)-H(31B)  | 109.2      |
| H(31A)-C(31)-H(31B) | 107.9      |
| C(31)-C(32)-C(33)   | 102.4(3)   |
| C(31)-C(32)-H(32A)  | 111.3      |
| C(33)-C(32)-H(32A)  | 111.3      |

|                     |            |
|---------------------|------------|
| C(31)-C(32)-H(32B)  | 111.3      |
| C(33)-C(32)-H(32B)  | 111.3      |
| H(32A)-C(32)-H(32B) | 109.2      |
| C(34)-C(33)-C(32)   | 102.9(2)   |
| C(34)-C(33)-H(33A)  | 111.2      |
| C(32)-C(33)-H(33A)  | 111.2      |
| C(34)-C(33)-H(33B)  | 111.2      |
| C(32)-C(33)-H(33B)  | 111.2      |
| H(33A)-C(33)-H(33B) | 109.1      |
| O(2)-C(34)-C(33)    | 106.0(2)   |
| O(2)-C(34)-H(34A)   | 110.5      |
| C(33)-C(34)-H(34A)  | 110.5      |
| O(2)-C(34)-H(34B)   | 110.5      |
| C(33)-C(34)-H(34B)  | 110.5      |
| H(34A)-C(34)-H(34B) | 108.7      |
| C(11)-N(1)-C(1)     | 132.08(11) |
| C(11)-N(1)-Sn(1)    | 93.61(7)   |
| C(1)-N(1)-Sn(1)     | 134.30(8)  |
| C(11)-N(2)-C(13)    | 126.28(11) |
| C(11)-N(2)-Sn(1)    | 95.91(8)   |
| C(13)-N(2)-Sn(1)    | 134.66(8)  |
| C(21)-N(3)-C(9)     | 118.61(10) |
| C(21)-N(3)-Sn(1)    | 95.58(8)   |
| C(9)-N(3)-Sn(1)     | 127.19(8)  |
| C(21)-N(4)-C(23)    | 123.45(11) |
| C(21)-N(4)-Sn(1)    | 90.62(8)   |
| C(23)-N(4)-Sn(1)    | 145.85(9)  |
| Sn(1)#1-O(1)-Sn(1)  | 95.98(4)   |
| C(31)-O(2)-C(34)    | 106.4(3)   |
| O(1)#1-Sn(1)-O(1)   | 84.01(4)   |
| O(1)#1-Sn(1)-N(3)   | 117.25(4)  |
| O(1)-Sn(1)-N(3)     | 106.26(4)  |
| O(1)#1-Sn(1)-N(2)   | 103.51(4)  |
| O(1)-Sn(1)-N(2)     | 101.24(4)  |
| N(3)-Sn(1)-N(2)     | 132.38(4)  |
| O(1)#1-Sn(1)-N(1)   | 163.46(4)  |
| O(1)-Sn(1)-N(1)     | 97.84(4)   |
| N(3)-Sn(1)-N(1)     | 78.15(4)   |
| N(2)-Sn(1)-N(1)     | 59.97(4)   |
| O(1)#1-Sn(1)-N(4)   | 93.43(4)   |
| O(1)-Sn(1)-N(4)     | 162.99(4)  |
| N(3)-Sn(1)-N(4)     | 60.07(4)   |
| N(2)-Sn(1)-N(4)     | 95.71(4)   |
| N(1)-Sn(1)-N(4)     | 89.39(4)   |
| O(1)#1-Sn(1)-C(21)  | 109.70(4)  |
| O(1)-Sn(1)-C(21)    | 136.53(4)  |
| N(3)-Sn(1)-C(21)    | 30.47(4)   |
| N(2)-Sn(1)-C(21)    | 114.25(4)  |
| N(1)-Sn(1)-C(21)    | 80.27(4)   |
| N(4)-Sn(1)-C(21)    | 29.81(4)   |
| O(1)#1-Sn(1)-C(11)  | 133.59(4)  |
| O(1)-Sn(1)-C(11)    | 100.72(4)  |
| N(3)-Sn(1)-C(11)    | 105.72(4)  |
| N(2)-Sn(1)-C(11)    | 30.09(4)   |

|                      |           |
|----------------------|-----------|
| N(1)-Sn(1)-C(11)     | 29.88(4)  |
| N(4)-Sn(1)-C(11)     | 93.23(4)  |
| C(21)-Sn(1)-C(11)    | 98.20(4)  |
| O(1)#1-Sn(1)-Sn(1)#1 | 42.11(3)  |
| O(1)-Sn(1)-Sn(1)#1   | 41.90(2)  |
| N(3)-Sn(1)-Sn(1)#1   | 119.75(3) |
| N(2)-Sn(1)-Sn(1)#1   | 106.75(3) |
| N(1)-Sn(1)-Sn(1)#1   | 137.37(3) |
| N(4)-Sn(1)-Sn(1)#1   | 133.24(3) |
| C(21)-Sn(1)-Sn(1)#1  | 135.70(3) |
| C(11)-Sn(1)-Sn(1)#1  | 126.04(3) |

---

Symmetry transformations used to generate equivalent atoms:

#1 -x+1,-y+1,-z+2

Table S24. Anisotropic displacement parameters ( $\text{\AA}^2 \times 10^3$ ) for R126.  
The anisotropic displacement factor exponent takes the form:  
 $-2 \pi^2 [ h^2 a^{*2} U_{11} + \dots + 2 h k a^* b^* U_{12} ]$

|       | U11    | U22   | U33    | U23    | U13    | U12    |
|-------|--------|-------|--------|--------|--------|--------|
| C(1)  | 16(1)  | 24(1) | 25(1)  | -1(1)  | -5(1)  | -9(1)  |
| C(2)  | 23(1)  | 40(1) | 39(1)  | -10(1) | -5(1)  | -16(1) |
| C(3)  | 26(1)  | 48(1) | 46(1)  | -4(1)  | -9(1)  | -22(1) |
| C(4)  | 19(1)  | 43(1) | 43(1)  | 5(1)   | -6(1)  | -16(1) |
| C(5)  | 16(1)  | 31(1) | 35(1)  | 3(1)   | -2(1)  | -9(1)  |
| C(6)  | 20(1)  | 42(1) | 48(1)  | -4(1)  | 8(1)   | -10(1) |
| C(7)  | 28(1)  | 42(1) | 55(1)  | -17(1) | 15(1)  | -10(1) |
| C(8)  | 26(1)  | 31(1) | 42(1)  | -13(1) | 7(1)   | -10(1) |
| C(9)  | 18(1)  | 21(1) | 28(1)  | -2(1)  | 0(1)   | -6(1)  |
| C(10) | 15(1)  | 23(1) | 26(1)  | 1(1)   | -2(1)  | -7(1)  |
| C(11) | 20(1)  | 26(1) | 27(1)  | -8(1)  | -2(1)  | -9(1)  |
| C(12) | 30(1)  | 60(1) | 51(1)  | -36(1) | 2(1)   | -19(1) |
| C(13) | 19(1)  | 23(1) | 26(1)  | -7(1)  | -2(1)  | -5(1)  |
| C(14) | 31(1)  | 24(1) | 34(1)  | -5(1)  | 0(1)   | -8(1)  |
| C(15) | 35(1)  | 24(1) | 42(1)  | -4(1)  | -3(1)  | -1(1)  |
| C(16) | 24(1)  | 33(1) | 37(1)  | -7(1)  | -2(1)  | 3(1)   |
| C(17) | 19(1)  | 36(1) | 30(1)  | -5(1)  | -2(1)  | -5(1)  |
| C(18) | 18(1)  | 26(1) | 27(1)  | -4(1)  | -3(1)  | -5(1)  |
| C(19) | 48(1)  | 32(1) | 58(1)  | 0(1)   | 12(1)  | -15(1) |
| C(20) | 25(1)  | 31(1) | 46(1)  | 2(1)   | 0(1)   | -10(1) |
| C(21) | 19(1)  | 16(1) | 28(1)  | 0(1)   | -5(1)  | -6(1)  |
| C(22) | 25(1)  | 22(1) | 46(1)  | 9(1)   | -5(1)  | 0(1)   |
| C(23) | 20(1)  | 21(1) | 27(1)  | 6(1)   | -3(1)  | -7(1)  |
| C(24) | 29(1)  | 24(1) | 37(1)  | 6(1)   | -5(1)  | -13(1) |
| C(25) | 40(1)  | 35(1) | 48(1)  | 11(1)  | -1(1)  | -22(1) |
| C(26) | 47(1)  | 38(1) | 39(1)  | 11(1)  | 5(1)   | -20(1) |
| C(27) | 41(1)  | 36(1) | 29(1)  | 8(1)   | -1(1)  | -14(1) |
| C(28) | 26(1)  | 29(1) | 28(1)  | 7(1)   | -4(1)  | -10(1) |
| C(29) | 53(1)  | 38(1) | 43(1)  | 6(1)   | -14(1) | -29(1) |
| C(30) | 45(1)  | 54(1) | 33(1)  | 8(1)   | -13(1) | -30(1) |
| C(31) | 195(5) | 94(3) | 72(2)  | -11(2) | -7(3)  | -84(3) |
| C(32) | 53(1)  | 90(2) | 66(2)  | -21(2) | -8(1)  | -14(1) |
| C(33) | 64(2)  | 57(2) | 122(3) | -37(2) | -28(2) | -6(1)  |
| C(34) | 43(1)  | 68(2) | 77(2)  | -8(1)  | -9(1)  | -15(1) |
| N(1)  | 16(1)  | 22(1) | 24(1)  | -4(1)  | -4(1)  | -7(1)  |
| N(2)  | 17(1)  | 24(1) | 26(1)  | -8(1)  | -1(1)  | -6(1)  |
| N(3)  | 17(1)  | 18(1) | 25(1)  | -2(1)  | -1(1)  | -6(1)  |
| N(4)  | 18(1)  | 20(1) | 25(1)  | 5(1)   | -5(1)  | -6(1)  |
| O(1)  | 17(1)  | 22(1) | 24(1)  | 3(1)   | -5(1)  | -10(1) |
| O(2)  | 74(1)  | 70(1) | 71(1)  | -24(1) | 2(1)   | -27(1) |
| Sn(1) | 13(1)  | 16(1) | 20(1)  | 0(1)   | -4(1)  | -5(1)  |

# Crystal data and structure refinement of compound 1b

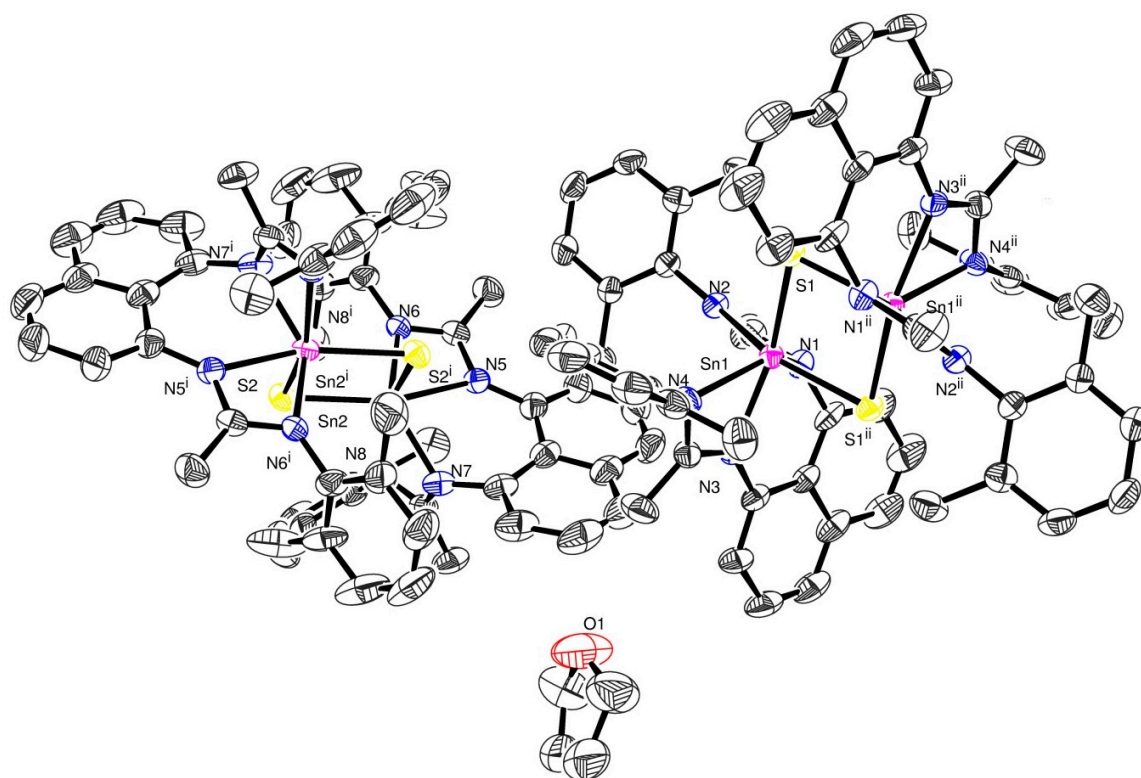

Figure S9. Asymmetric unit (Symmetry code : i = -x, -y, 1-z ; ii = -x, 1-y, 2-z)

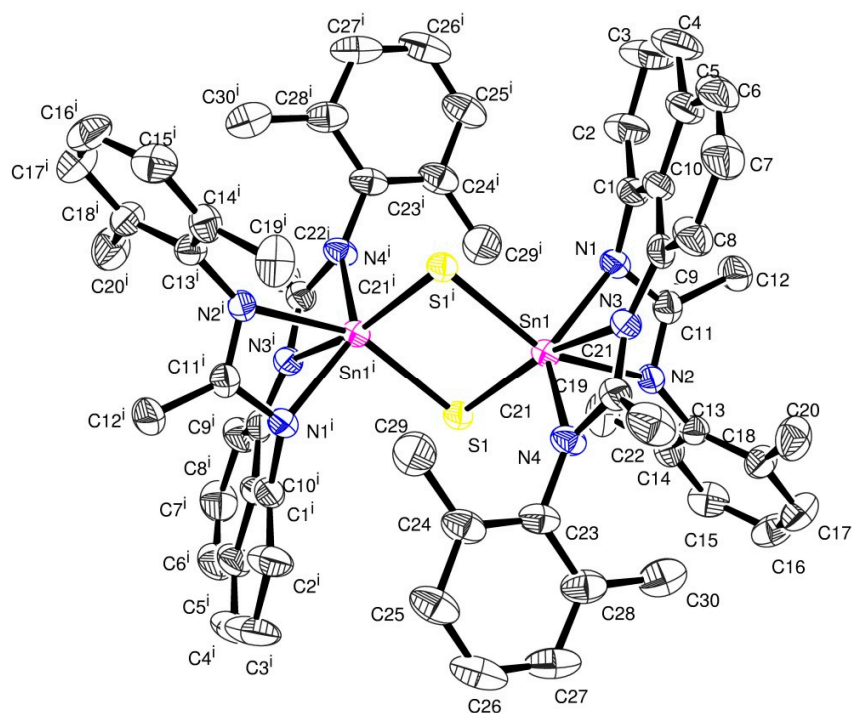

Figure S10. Compound (Symmetry code : i= -x, 1-y, 2-z)

Table S25. Crystal data and structure refinement for R200.

|                             |                                                                                                                 |                           |
|-----------------------------|-----------------------------------------------------------------------------------------------------------------|---------------------------|
| Identification code         | R200                                                                                                            |                           |
| Empirical formula           | C <sub>60</sub> H <sub>60</sub> N <sub>8</sub> S <sub>2</sub> Sn <sub>2</sub> , C <sub>4</sub> H <sub>8</sub> O |                           |
| Formula weight              | 1266.80                                                                                                         |                           |
| Temperature                 | 193 (2) K                                                                                                       |                           |
| Wavelength                  | 0.71073 Å                                                                                                       |                           |
| Crystal system, space group | Triclinic, P -1                                                                                                 |                           |
| Unit cell dimensions        | a = 12.269 (5) Å                                                                                                | alpha = 95.205 (15) deg.  |
|                             | b = 12.952 (7) Å                                                                                                | beta = 94.892 (14) deg.   |
|                             | c = 19.923 (6) Å                                                                                                | gamma = 110.382 (19) deg. |
| Volume                      | 2932 (2) Å <sup>3</sup>                                                                                         |                           |
| Z, Calculated density       | 2, 1.435 Mg/m <sup>3</sup>                                                                                      |                           |



|                                   |                                             |
|-----------------------------------|---------------------------------------------|
| Absorption coefficient            | 0.972 mm <sup>-1</sup>                      |
| F(000)                            | 1296                                        |
| Crystal size                      | 0.100 x 0.080 x 0.060 mm                    |
| Theta range for data collection   | 2.837 to 28.722 deg.                        |
| Limiting indices                  | -16<=h<=16, -17<=k<=17,<br>-26<=l<=26       |
| Reflections collected / unique    | 75605 / 15114 [R(int) = 0.1174]             |
| Completeness to theta = 25.242    | 99.9 %                                      |
| Refinement method                 | Full-matrix least-squares on F <sup>2</sup> |
| Data / restraints / parameters    | 15114 / 0 / 706                             |
| Goodness-of-fit on F <sup>2</sup> | 1.008                                       |
| Final R indices [I>2sigma(I)]     | R1 = 0.0515, wR2 = 0.0893                   |
| R indices (all data)              | R1 = 0.1157, wR2 = 0.1092                   |
| Largest diff. peak and hole       | 0.687 and -0.593 e.A <sup>-3</sup>          |

Table S26. Atomic coordinates ( $\times 10^4$ ) and equivalent isotropic displacement parameters ( $\text{\AA}^2 \times 10^3$ ) for R200.  
 $U(\text{eq})$  is defined as one third of the trace of the orthogonalized  $U_{ij}$  tensor.

|       | x        | y       | z        | U(eq) |
|-------|----------|---------|----------|-------|
| C(1)  | 2592(4)  | 6749(4) | 8920(2)  | 37(1) |
| C(2)  | 2884(5)  | 7875(4) | 8972(3)  | 52(1) |
| C(3)  | 4065(5)  | 8594(5) | 9071(3)  | 71(2) |
| C(4)  | 4919(5)  | 8150(5) | 9100(3)  | 65(2) |
| C(5)  | 4674(4)  | 6991(5) | 9059(3)  | 48(1) |
| C(6)  | 5589(4)  | 6578(5) | 9095(3)  | 56(2) |
| C(7)  | 5369(4)  | 5471(5) | 9085(3)  | 55(2) |
| C(8)  | 4211(4)  | 4720(4) | 9051(3)  | 44(1) |
| C(9)  | 3262(4)  | 5068(4) | 9008(2)  | 34(1) |
| C(10) | 3473(4)  | 6245(4) | 8993(2)  | 34(1) |
| C(11) | 837(4)   | 5695(4) | 8142(2)  | 33(1) |
| C(12) | 1231(4)  | 6306(4) | 7553(2)  | 47(1) |
| C(13) | -836(4)  | 4290(4) | 7492(2)  | 31(1) |
| C(14) | -1886(4) | 4487(4) | 7392(2)  | 36(1) |
| C(15) | -2644(4) | 3987(4) | 6802(3)  | 45(1) |
| C(16) | -2363(5) | 3323(4) | 6313(3)  | 49(1) |
| C(17) | -1319(5) | 3151(4) | 6410(3)  | 48(1) |
| C(18) | -544(4)  | 3612(4) | 7000(2)  | 36(1) |
| C(19) | -2172(5) | 5265(5) | 7905(3)  | 50(1) |
| C(20) | 609(4)   | 3436(5) | 7086(3)  | 53(1) |
| C(21) | 1632(4)  | 3272(4) | 9070(2)  | 33(1) |
| C(22) | 2207(4)  | 2417(4) | 9001(3)  | 54(2) |
| C(23) | -212(4)  | 1913(4) | 9313(3)  | 35(1) |
| C(24) | -244(4)  | 1663(4) | 9986(3)  | 41(1) |
| C(25) | -1004(4) | 626(4)  | 10091(3) | 50(1) |
| C(26) | -1696(4) | -134(4) | 9560(4)  | 56(2) |
| C(27) | -1649(4) | 105(4)  | 8906(3)  | 54(2) |
| C(28) | -914(4)  | 1137(4) | 8765(3)  | 44(1) |
| C(29) | 512(5)   | 2461(4) | 10574(3) | 56(2) |
| C(30) | -856(5)  | 1396(5) | 8045(3)  | 59(2) |
| C(31) | 2199(4)  | 3911(4) | 5415(3)  | 41(1) |
| C(32) | 2329(5)  | 4999(4) | 5368(3)  | 54(1) |
| C(33) | 2942(5)  | 5857(5) | 5898(4)  | 69(2) |
| C(34) | 3394(5)  | 5607(5) | 6482(4)  | 66(2) |
| C(35) | 3345(4)  | 4525(5) | 6546(3)  | 54(2) |
| C(36) | 3794(5)  | 4291(7) | 7156(3)  | 72(2) |
| C(37) | 3753(5)  | 3248(7) | 7234(3)  | 77(2) |
| C(38) | 3336(5)  | 2384(6) | 6677(3)  | 66(2) |
| C(39) | 2929(4)  | 2608(5) | 6054(3)  | 43(1) |
| C(40) | 2817(4)  | 3657(4) | 5991(3)  | 43(1) |
| C(41) | 648(4)   | 2940(4) | 4426(2)  | 35(1) |
| C(42) | 309(5)   | 3879(4) | 4194(3)  | 54(1) |
| C(43) | -829(4)  | 1495(4) | 3612(3)  | 44(1) |
| C(44) | -1937(5) | 1388(5) | 3776(3)  | 59(2) |

|       |           |           |          |         |
|-------|-----------|-----------|----------|---------|
| C(45) | -2875 (6) | 970 (6)   | 3285 (4) | 88 (2)  |
| C(46) | -2746 (7) | 594 (6)   | 2632 (4) | 90 (3)  |
| C(47) | -1646 (6) | 666 (5)   | 2467 (3) | 72 (2)  |
| C(48) | -672 (5)  | 1126 (4)  | 2961 (3) | 52 (1)  |
| C(49) | -2124 (6) | 1727 (7)  | 4493 (4) | 92 (3)  |
| C(50) | 537 (6)   | 1232 (6)  | 2779 (3) | 71 (2)  |
| C(51) | 3373 (4)  | 1988 (4)  | 4987 (3) | 38 (1)  |
| C(52) | 4675 (4)  | 2597 (5)  | 5127 (3) | 57 (2)  |
| C(53) | 3345 (4)  | 1555 (4)  | 3769 (3) | 41 (1)  |
| C(54) | 3623 (4)  | 610 (5)   | 3577 (3) | 56 (2)  |
| C(55) | 4058 (5)  | 543 (6)   | 2963 (4) | 80 (2)  |
| C(56) | 4220 (5)  | 1373 (8)  | 2554 (4) | 90 (3)  |
| C(57) | 3967 (5)  | 2293 (6)  | 2752 (3) | 71 (2)  |
| C(58) | 3542 (4)  | 2424 (5)  | 3366 (3) | 51 (1)  |
| C(59) | 3487 (5)  | -271 (5)  | 4043 (4) | 88 (3)  |
| C(60) | 3339 (5)  | 3469 (5)  | 3601 (3) | 65 (2)  |
| C(61) | 5681 (8)  | 2215 (8)  | 8124 (5) | 115 (3) |
| C(62) | 6549 (9)  | 1870 (10) | 8452 (5) | 145 (5) |
| C(63) | 6224 (7)  | 1656 (6)  | 9147 (6) | 108 (3) |
| C(64) | 5219 (8)  | 2057 (8)  | 9169 (4) | 116 (3) |
| N(1)  | 1386 (3)  | 6079 (3)  | 8778 (2) | 32 (1)  |
| N(2)  | -56 (3)   | 4756 (3)  | 8109 (2) | 29 (1)  |
| N(3)  | 2106 (3)  | 4357 (3)  | 9033 (2) | 30 (1)  |
| N(4)  | 523 (3)   | 2992 (3)  | 9188 (2) | 32 (1)  |
| N(5)  | 1442 (3)  | 3001 (3)  | 4947 (2) | 35 (1)  |
| N(6)  | 167 (3)   | 1905 (3)  | 4119 (2) | 33 (1)  |
| N(7)  | 2683 (3)  | 1793 (3)  | 5474 (2) | 39 (1)  |
| N(8)  | 2808 (3)  | 1605 (3)  | 4370 (2) | 37 (1)  |
| S(1)  | -1432 (1) | 4460 (1)  | 9574 (1) | 30 (1)  |
| S(2)  | 268 (1)   | -759 (1)  | 4290 (1) | 36 (1)  |
| Sn(1) | 496 (1)   | 4687 (1)  | 9270 (1) | 26 (1)  |
| Sn(2) | 1041 (1)  | 1155 (1)  | 4825 (1) | 30 (1)  |
| O(1)  | 4754 (5)  | 2050 (6)  | 8513 (3) | 126 (2) |

---

Table S27. Bond lengths [Å] and angles [deg] for R200.

---

|              |          |
|--------------|----------|
| C(1)-C(2)    | 1.367(7) |
| C(1)-N(1)    | 1.419(5) |
| C(1)-C(10)   | 1.447(7) |
| C(2)-C(3)    | 1.409(7) |
| C(2)-H(2)    | 0.9500   |
| C(3)-C(4)    | 1.359(9) |
| C(3)-H(3)    | 0.9500   |
| C(4)-C(5)    | 1.417(8) |
| C(4)-H(4)    | 0.9500   |
| C(5)-C(6)    | 1.401(8) |
| C(5)-C(10)   | 1.441(6) |
| C(6)-C(7)    | 1.361(8) |
| C(6)-H(6)    | 0.9500   |
| C(7)-C(8)    | 1.406(7) |
| C(7)-H(7)    | 0.9500   |
| C(8)-C(9)    | 1.387(6) |
| C(8)-H(8)    | 0.9500   |
| C(9)-N(3)    | 1.404(5) |
| C(9)-C(10)   | 1.459(7) |
| C(11)-N(2)   | 1.315(5) |
| C(11)-N(1)   | 1.345(6) |
| C(11)-C(12)  | 1.496(6) |
| C(12)-H(12A) | 0.9800   |
| C(12)-H(12B) | 0.9800   |
| C(12)-H(12C) | 0.9800   |
| C(13)-C(14)  | 1.399(6) |
| C(13)-C(18)  | 1.408(6) |
| C(13)-N(2)   | 1.433(5) |
| C(14)-C(15)  | 1.385(6) |
| C(14)-C(19)  | 1.519(6) |
| C(15)-C(16)  | 1.385(7) |
| C(15)-H(15)  | 0.9500   |
| C(16)-C(17)  | 1.376(7) |
| C(16)-H(16)  | 0.9500   |
| C(17)-C(18)  | 1.390(6) |
| C(17)-H(17)  | 0.9500   |
| C(18)-C(20)  | 1.507(6) |
| C(19)-H(19A) | 0.9800   |
| C(19)-H(19B) | 0.9800   |
| C(19)-H(19C) | 0.9800   |
| C(20)-H(20A) | 0.9800   |
| C(20)-H(20B) | 0.9800   |
| C(20)-H(20C) | 0.9800   |
| C(21)-N(4)   | 1.328(5) |
| C(21)-N(3)   | 1.332(5) |
| C(21)-C(22)  | 1.508(6) |
| C(22)-H(22A) | 0.9800   |
| C(22)-H(22B) | 0.9800   |
| C(22)-H(22C) | 0.9800   |
| C(23)-C(28)  | 1.408(7) |
| C(23)-C(24)  | 1.409(7) |

|                |            |
|----------------|------------|
| C(23) - N(4)   | 1.433 (5)  |
| C(24) - C(25)  | 1.390 (6)  |
| C(24) - C(29)  | 1.492 (7)  |
| C(25) - C(26)  | 1.372 (8)  |
| C(25) - H(25)  | 0.9500     |
| C(26) - C(27)  | 1.368 (8)  |
| C(26) - H(26)  | 0.9500     |
| C(27) - C(28)  | 1.397 (7)  |
| C(27) - H(27)  | 0.9500     |
| C(28) - C(30)  | 1.504 (8)  |
| C(29) - H(29A) | 0.9800     |
| C(29) - H(29B) | 0.9800     |
| C(29) - H(29C) | 0.9800     |
| C(30) - H(30A) | 0.9800     |
| C(30) - H(30B) | 0.9800     |
| C(30) - H(30C) | 0.9800     |
| C(31) - C(32)  | 1.376 (7)  |
| C(31) - N(5)   | 1.418 (6)  |
| C(31) - C(40)  | 1.446 (7)  |
| C(32) - C(33)  | 1.409 (8)  |
| C(32) - H(32)  | 0.9500     |
| C(33) - C(34)  | 1.361 (9)  |
| C(33) - H(33)  | 0.9500     |
| C(34) - C(35)  | 1.399 (9)  |
| C(34) - H(34)  | 0.9500     |
| C(35) - C(36)  | 1.393 (9)  |
| C(35) - C(40)  | 1.433 (7)  |
| C(36) - C(37)  | 1.358 (10) |
| C(36) - H(36)  | 0.9500     |
| C(37) - C(38)  | 1.423 (9)  |
| C(37) - H(37)  | 0.9500     |
| C(38) - C(39)  | 1.391 (7)  |
| C(38) - H(38)  | 0.9500     |
| C(39) - C(40)  | 1.427 (7)  |
| C(39) - N(7)   | 1.427 (6)  |
| C(41) - N(6)   | 1.326 (6)  |
| C(41) - N(5)   | 1.339 (6)  |
| C(41) - C(42)  | 1.513 (7)  |
| C(42) - H(42A) | 0.9800     |
| C(42) - H(42B) | 0.9800     |
| C(42) - H(42C) | 0.9800     |
| C(43) - C(44)  | 1.388 (7)  |
| C(43) - C(48)  | 1.395 (7)  |
| C(43) - N(6)   | 1.426 (6)  |
| C(44) - C(45)  | 1.362 (8)  |
| C(44) - C(49)  | 1.516 (9)  |
| C(45) - C(46)  | 1.389 (11) |
| C(45) - H(45)  | 0.9500     |
| C(46) - C(47)  | 1.390 (10) |
| C(46) - H(46)  | 0.9500     |
| C(47) - C(48)  | 1.396 (8)  |
| C(47) - H(47)  | 0.9500     |
| C(48) - C(50)  | 1.519 (8)  |
| C(49) - H(49A) | 0.9800     |

|              |            |
|--------------|------------|
| C(49)-H(49B) | 0.9800     |
| C(49)-H(49C) | 0.9800     |
| C(50)-H(50A) | 0.9800     |
| C(50)-H(50B) | 0.9800     |
| C(50)-H(50C) | 0.9800     |
| C(51)-N(8)   | 1.319(6)   |
| C(51)-N(7)   | 1.326(6)   |
| C(51)-C(52)  | 1.503(6)   |
| C(51)-Sn(2)  | 2.662(5)   |
| C(52)-H(52A) | 0.9800     |
| C(52)-H(52B) | 0.9800     |
| C(52)-H(52C) | 0.9800     |
| C(53)-C(58)  | 1.405(7)   |
| C(53)-C(54)  | 1.411(7)   |
| C(53)-N(8)   | 1.422(6)   |
| C(54)-C(55)  | 1.384(9)   |
| C(54)-C(59)  | 1.509(9)   |
| C(55)-C(56)  | 1.377(11)  |
| C(55)-H(55)  | 0.9500     |
| C(56)-C(57)  | 1.365(10)  |
| C(56)-H(56)  | 0.9500     |
| C(57)-C(58)  | 1.389(8)   |
| C(57)-H(57)  | 0.9500     |
| C(58)-C(60)  | 1.502(8)   |
| C(59)-H(59A) | 0.9800     |
| C(59)-H(59B) | 0.9800     |
| C(59)-H(59C) | 0.9800     |
| C(60)-H(60A) | 0.9800     |
| C(60)-H(60B) | 0.9800     |
| C(60)-H(60C) | 0.9800     |
| C(61)-O(1)   | 1.396(9)   |
| C(61)-C(62)  | 1.423(11)  |
| C(61)-H(61A) | 0.9900     |
| C(61)-H(61B) | 0.9900     |
| C(62)-C(63)  | 1.498(13)  |
| C(62)-H(62A) | 0.9900     |
| C(62)-H(62B) | 0.9900     |
| C(63)-C(64)  | 1.498(11)  |
| C(63)-H(63A) | 0.9900     |
| C(63)-H(63B) | 0.9900     |
| C(64)-O(1)   | 1.378(9)   |
| C(64)-H(64A) | 0.9900     |
| C(64)-H(64B) | 0.9900     |
| N(1)-Sn(1)   | 2.130(4)   |
| N(2)-Sn(1)   | 2.374(3)   |
| N(3)-Sn(1)   | 2.240(3)   |
| N(4)-Sn(1)   | 2.198(4)   |
| N(5)-Sn(2)   | 2.252(4)   |
| N(6)-Sn(2)   | 2.189(4)   |
| N(7)-Sn(2)   | 2.148(4)   |
| N(8)-Sn(2)   | 2.327(4)   |
| S(1)-Sn(1)   | 2.4172(14) |
| S(1)-Sn(1)#1 | 2.4585(13) |
| S(2)-Sn(2)   | 2.4271(17) |

|                          |             |
|--------------------------|-------------|
| S (2) -Sn (2) #2         | 2.4546 (13) |
| C (2) -C (1) -N (1)      | 117.6 (5)   |
| C (2) -C (1) -C (10)     | 121.9 (4)   |
| N (1) -C (1) -C (10)     | 120.5 (4)   |
| C (1) -C (2) -C (3)      | 121.0 (6)   |
| C (1) -C (2) -H (2)      | 119.5       |
| C (3) -C (2) -H (2)      | 119.5       |
| C (4) -C (3) -C (2)      | 118.9 (6)   |
| C (4) -C (3) -H (3)      | 120.6       |
| C (2) -C (3) -H (3)      | 120.6       |
| C (3) -C (4) -C (5)      | 122.8 (5)   |
| C (3) -C (4) -H (4)      | 118.6       |
| C (5) -C (4) -H (4)      | 118.6       |
| C (6) -C (5) -C (4)      | 120.5 (5)   |
| C (6) -C (5) -C (10)     | 120.4 (5)   |
| C (4) -C (5) -C (10)     | 119.1 (5)   |
| C (7) -C (6) -C (5)      | 121.1 (5)   |
| C (7) -C (6) -H (6)      | 119.4       |
| C (5) -C (6) -H (6)      | 119.4       |
| C (6) -C (7) -C (8)      | 120.2 (5)   |
| C (6) -C (7) -H (7)      | 119.9       |
| C (8) -C (7) -H (7)      | 119.9       |
| C (9) -C (8) -C (7)      | 121.8 (5)   |
| C (9) -C (8) -H (8)      | 119.1       |
| C (7) -C (8) -H (8)      | 119.1       |
| C (8) -C (9) -N (3)      | 123.2 (4)   |
| C (8) -C (9) -C (10)     | 118.9 (4)   |
| N (3) -C (9) -C (10)     | 117.7 (4)   |
| C (5) -C (10) -C (1)     | 116.1 (4)   |
| C (5) -C (10) -C (9)     | 117.4 (4)   |
| C (1) -C (10) -C (9)     | 126.5 (4)   |
| N (2) -C (11) -N (1)     | 112.8 (4)   |
| N (2) -C (11) -C (12)    | 125.4 (4)   |
| N (1) -C (11) -C (12)    | 121.8 (4)   |
| C (11) -C (12) -H (12A)  | 109.5       |
| C (11) -C (12) -H (12B)  | 109.5       |
| H (12A) -C (12) -H (12B) | 109.5       |
| C (11) -C (12) -H (12C)  | 109.5       |
| H (12A) -C (12) -H (12C) | 109.5       |
| H (12B) -C (12) -H (12C) | 109.5       |
| C (14) -C (13) -C (18)   | 120.9 (4)   |
| C (14) -C (13) -N (2)    | 120.1 (4)   |
| C (18) -C (13) -N (2)    | 119.0 (4)   |
| C (15) -C (14) -C (13)   | 118.7 (4)   |
| C (15) -C (14) -C (19)   | 120.4 (4)   |
| C (13) -C (14) -C (19)   | 120.9 (4)   |
| C (16) -C (15) -C (14)   | 121.0 (5)   |
| C (16) -C (15) -H (15)   | 119.5       |
| C (14) -C (15) -H (15)   | 119.5       |
| C (17) -C (16) -C (15)   | 120.0 (5)   |
| C (17) -C (16) -H (16)   | 120.0       |
| C (15) -C (16) -H (16)   | 120.0       |
| C (16) -C (17) -C (18)   | 121.1 (5)   |

|                     |          |
|---------------------|----------|
| C(16)-C(17)-H(17)   | 119.5    |
| C(18)-C(17)-H(17)   | 119.5    |
| C(17)-C(18)-C(13)   | 118.4(4) |
| C(17)-C(18)-C(20)   | 120.1(4) |
| C(13)-C(18)-C(20)   | 121.5(4) |
| C(14)-C(19)-H(19A)  | 109.5    |
| C(14)-C(19)-H(19B)  | 109.5    |
| H(19A)-C(19)-H(19B) | 109.5    |
| C(14)-C(19)-H(19C)  | 109.5    |
| H(19A)-C(19)-H(19C) | 109.5    |
| H(19B)-C(19)-H(19C) | 109.5    |
| C(18)-C(20)-H(20A)  | 109.5    |
| C(18)-C(20)-H(20B)  | 109.5    |
| H(20A)-C(20)-H(20B) | 109.5    |
| C(18)-C(20)-H(20C)  | 109.5    |
| H(20A)-C(20)-H(20C) | 109.5    |
| H(20B)-C(20)-H(20C) | 109.5    |
| N(4)-C(21)-N(3)     | 110.9(4) |
| N(4)-C(21)-C(22)    | 121.1(4) |
| N(3)-C(21)-C(22)    | 128.0(4) |
| C(21)-C(22)-H(22A)  | 109.5    |
| C(21)-C(22)-H(22B)  | 109.5    |
| H(22A)-C(22)-H(22B) | 109.5    |
| C(21)-C(22)-H(22C)  | 109.5    |
| H(22A)-C(22)-H(22C) | 109.5    |
| H(22B)-C(22)-H(22C) | 109.5    |
| C(28)-C(23)-C(24)   | 121.4(4) |
| C(28)-C(23)-N(4)    | 119.5(4) |
| C(24)-C(23)-N(4)    | 119.1(4) |
| C(25)-C(24)-C(23)   | 117.5(5) |
| C(25)-C(24)-C(29)   | 120.1(5) |
| C(23)-C(24)-C(29)   | 122.4(4) |
| C(26)-C(25)-C(24)   | 121.6(6) |
| C(26)-C(25)-H(25)   | 119.2    |
| C(24)-C(25)-H(25)   | 119.2    |
| C(27)-C(26)-C(25)   | 120.8(5) |
| C(27)-C(26)-H(26)   | 119.6    |
| C(25)-C(26)-H(26)   | 119.6    |
| C(26)-C(27)-C(28)   | 120.7(5) |
| C(26)-C(27)-H(27)   | 119.6    |
| C(28)-C(27)-H(27)   | 119.6    |
| C(27)-C(28)-C(23)   | 118.1(5) |
| C(27)-C(28)-C(30)   | 120.7(5) |
| C(23)-C(28)-C(30)   | 121.2(5) |
| C(24)-C(29)-H(29A)  | 109.5    |
| C(24)-C(29)-H(29B)  | 109.5    |
| H(29A)-C(29)-H(29B) | 109.5    |
| C(24)-C(29)-H(29C)  | 109.5    |
| H(29A)-C(29)-H(29C) | 109.5    |
| H(29B)-C(29)-H(29C) | 109.5    |
| C(28)-C(30)-H(30A)  | 109.5    |
| C(28)-C(30)-H(30B)  | 109.5    |
| H(30A)-C(30)-H(30B) | 109.5    |
| C(28)-C(30)-H(30C)  | 109.5    |



|                     |          |
|---------------------|----------|
| H(30A)-C(30)-H(30C) | 109.5    |
| H(30B)-C(30)-H(30C) | 109.5    |
| C(32)-C(31)-N(5)    | 123.8(5) |
| C(32)-C(31)-C(40)   | 119.0(5) |
| N(5)-C(31)-C(40)    | 117.1(4) |
| C(31)-C(32)-C(33)   | 121.8(6) |
| C(31)-C(32)-H(32)   | 119.1    |
| C(33)-C(32)-H(32)   | 119.1    |
| C(34)-C(33)-C(32)   | 119.6(6) |
| C(34)-C(33)-H(33)   | 120.2    |
| C(32)-C(33)-H(33)   | 120.2    |
| C(33)-C(34)-C(35)   | 121.1(6) |
| C(33)-C(34)-H(34)   | 119.4    |
| C(35)-C(34)-H(34)   | 119.4    |
| C(36)-C(35)-C(34)   | 119.8(6) |
| C(36)-C(35)-C(40)   | 120.0(6) |
| C(34)-C(35)-C(40)   | 120.2(6) |
| C(37)-C(36)-C(35)   | 121.1(6) |
| C(37)-C(36)-H(36)   | 119.4    |
| C(35)-C(36)-H(36)   | 119.4    |
| C(36)-C(37)-C(38)   | 120.6(6) |
| C(36)-C(37)-H(37)   | 119.7    |
| C(38)-C(37)-H(37)   | 119.7    |
| C(39)-C(38)-C(37)   | 119.3(6) |
| C(39)-C(38)-H(38)   | 120.4    |
| C(37)-C(38)-H(38)   | 120.4    |
| C(38)-C(39)-C(40)   | 120.4(5) |
| C(38)-C(39)-N(7)    | 118.8(5) |
| C(40)-C(39)-N(7)    | 120.8(4) |
| C(39)-C(40)-C(35)   | 117.5(5) |
| C(39)-C(40)-C(31)   | 125.3(5) |
| C(35)-C(40)-C(31)   | 117.2(5) |
| N(6)-C(41)-N(5)     | 110.2(4) |
| N(6)-C(41)-C(42)    | 122.6(4) |
| N(5)-C(41)-C(42)    | 127.3(4) |
| C(41)-C(42)-H(42A)  | 109.5    |
| C(41)-C(42)-H(42B)  | 109.5    |
| H(42A)-C(42)-H(42B) | 109.5    |
| C(41)-C(42)-H(42C)  | 109.5    |
| H(42A)-C(42)-H(42C) | 109.5    |
| H(42B)-C(42)-H(42C) | 109.5    |
| C(44)-C(43)-C(48)   | 120.9(5) |
| C(44)-C(43)-N(6)    | 120.8(5) |
| C(48)-C(43)-N(6)    | 118.1(4) |
| C(45)-C(44)-C(43)   | 119.5(6) |
| C(45)-C(44)-C(49)   | 119.2(6) |
| C(43)-C(44)-C(49)   | 121.3(5) |
| C(44)-C(45)-C(46)   | 120.7(7) |
| C(44)-C(45)-H(45)   | 119.6    |
| C(46)-C(45)-H(45)   | 119.6    |
| C(45)-C(46)-C(47)   | 120.2(6) |
| C(45)-C(46)-H(46)   | 119.9    |
| C(47)-C(46)-H(46)   | 119.9    |
| C(46)-C(47)-C(48)   | 119.5(7) |

|                         |          |
|-------------------------|----------|
| C(46) - C(47) - H(47)   | 120.3    |
| C(48) - C(47) - H(47)   | 120.3    |
| C(43) - C(48) - C(47)   | 119.0(6) |
| C(43) - C(48) - C(50)   | 121.2(5) |
| C(47) - C(48) - C(50)   | 119.8(6) |
| C(44) - C(49) - H(49A)  | 109.5    |
| C(44) - C(49) - H(49B)  | 109.5    |
| H(49A) - C(49) - H(49B) | 109.5    |
| C(44) - C(49) - H(49C)  | 109.5    |
| H(49A) - C(49) - H(49C) | 109.5    |
| H(49B) - C(49) - H(49C) | 109.5    |
| C(48) - C(50) - H(50A)  | 109.5    |
| C(48) - C(50) - H(50B)  | 109.5    |
| H(50A) - C(50) - H(50B) | 109.5    |
| C(48) - C(50) - H(50C)  | 109.5    |
| H(50A) - C(50) - H(50C) | 109.5    |
| H(50B) - C(50) - H(50C) | 109.5    |
| N(8) - C(51) - N(7)     | 113.7(4) |
| N(8) - C(51) - C(52)    | 123.4(4) |
| N(7) - C(51) - C(52)    | 122.9(5) |
| N(8) - C(51) - Sn(2)    | 60.9(2)  |
| N(7) - C(51) - Sn(2)    | 53.2(2)  |
| C(52) - C(51) - Sn(2)   | 172.2(4) |
| C(51) - C(52) - H(52A)  | 109.5    |
| C(51) - C(52) - H(52B)  | 109.5    |
| H(52A) - C(52) - H(52B) | 109.5    |
| C(51) - C(52) - H(52C)  | 109.5    |
| H(52A) - C(52) - H(52C) | 109.5    |
| H(52B) - C(52) - H(52C) | 109.5    |
| C(58) - C(53) - C(54)   | 121.6(5) |
| C(58) - C(53) - N(8)    | 119.5(5) |
| C(54) - C(53) - N(8)    | 118.9(5) |
| C(55) - C(54) - C(53)   | 117.7(6) |
| C(55) - C(54) - C(59)   | 121.7(6) |
| C(53) - C(54) - C(59)   | 120.5(5) |
| C(56) - C(55) - C(54)   | 121.2(7) |
| C(56) - C(55) - H(55)   | 119.4    |
| C(54) - C(55) - H(55)   | 119.4    |
| C(57) - C(56) - C(55)   | 120.5(6) |
| C(57) - C(56) - H(56)   | 119.8    |
| C(55) - C(56) - H(56)   | 119.8    |
| C(56) - C(57) - C(58)   | 121.5(7) |
| C(56) - C(57) - H(57)   | 119.2    |
| C(58) - C(57) - H(57)   | 119.2    |
| C(57) - C(58) - C(53)   | 117.5(6) |
| C(57) - C(58) - C(60)   | 121.3(6) |
| C(53) - C(58) - C(60)   | 121.2(5) |
| C(54) - C(59) - H(59A)  | 109.5    |
| C(54) - C(59) - H(59B)  | 109.5    |
| H(59A) - C(59) - H(59B) | 109.5    |
| C(54) - C(59) - H(59C)  | 109.5    |
| H(59A) - C(59) - H(59C) | 109.5    |
| H(59B) - C(59) - H(59C) | 109.5    |
| C(58) - C(60) - H(60A)  | 109.5    |

|                     |          |
|---------------------|----------|
| C(58)-C(60)-H(60B)  | 109.5    |
| H(60A)-C(60)-H(60B) | 109.5    |
| C(58)-C(60)-H(60C)  | 109.5    |
| H(60A)-C(60)-H(60C) | 109.5    |
| H(60B)-C(60)-H(60C) | 109.5    |
| O(1)-C(61)-C(62)    | 109.7(9) |
| O(1)-C(61)-H(61A)   | 109.7    |
| C(62)-C(61)-H(61A)  | 109.7    |
| O(1)-C(61)-H(61B)   | 109.7    |
| C(62)-C(61)-H(61B)  | 109.7    |
| H(61A)-C(61)-H(61B) | 108.2    |
| C(61)-C(62)-C(63)   | 106.7(8) |
| C(61)-C(62)-H(62A)  | 110.4    |
| C(63)-C(62)-H(62A)  | 110.4    |
| C(61)-C(62)-H(62B)  | 110.4    |
| C(63)-C(62)-H(62B)  | 110.4    |
| H(62A)-C(62)-H(62B) | 108.6    |
| C(62)-C(63)-C(64)   | 101.4(7) |
| C(62)-C(63)-H(63A)  | 111.5    |
| C(64)-C(63)-H(63A)  | 111.5    |
| C(62)-C(63)-H(63B)  | 111.5    |
| C(64)-C(63)-H(63B)  | 111.5    |
| H(63A)-C(63)-H(63B) | 109.3    |
| O(1)-C(64)-C(63)    | 108.8(8) |
| O(1)-C(64)-H(64A)   | 109.9    |
| C(63)-C(64)-H(64A)  | 109.9    |
| O(1)-C(64)-H(64B)   | 109.9    |
| C(63)-C(64)-H(64B)  | 109.9    |
| H(64A)-C(64)-H(64B) | 108.3    |
| C(11)-N(1)-C(1)     | 123.0(4) |
| C(11)-N(1)-Sn(1)    | 99.0(3)  |
| C(1)-N(1)-Sn(1)     | 125.9(3) |
| C(11)-N(2)-C(13)    | 120.9(4) |
| C(11)-N(2)-Sn(1)    | 88.9(3)  |
| C(13)-N(2)-Sn(1)    | 150.1(3) |
| C(21)-N(3)-C(9)     | 132.6(4) |
| C(21)-N(3)-Sn(1)    | 93.9(3)  |
| C(9)-N(3)-Sn(1)     | 132.2(3) |
| C(21)-N(4)-C(23)    | 125.3(4) |
| C(21)-N(4)-Sn(1)    | 95.9(3)  |
| C(23)-N(4)-Sn(1)    | 138.0(3) |
| C(41)-N(5)-C(31)    | 131.7(4) |
| C(41)-N(5)-Sn(2)    | 93.7(3)  |
| C(31)-N(5)-Sn(2)    | 134.5(3) |
| C(41)-N(6)-C(43)    | 125.7(4) |
| C(41)-N(6)-Sn(2)    | 97.0(3)  |
| C(43)-N(6)-Sn(2)    | 135.1(3) |
| C(51)-N(7)-C(39)    | 119.4(4) |
| C(51)-N(7)-Sn(2)    | 97.2(3)  |
| C(39)-N(7)-Sn(2)    | 123.8(3) |
| C(51)-N(8)-C(53)    | 125.2(4) |
| C(51)-N(8)-Sn(2)    | 89.4(3)  |
| C(53)-N(8)-Sn(2)    | 145.3(3) |
| Sn(1)-S(1)-Sn(1)#1  | 87.92(4) |

|                    |            |
|--------------------|------------|
| Sn(2)-S(2)-Sn(2)#2 | 87.14(4)   |
| N(1)-Sn(1)-N(4)    | 131.38(14) |
| N(1)-Sn(1)-N(3)    | 77.63(14)  |
| N(4)-Sn(1)-N(3)    | 59.16(13)  |
| N(1)-Sn(1)-N(2)    | 58.65(13)  |
| N(4)-Sn(1)-N(2)    | 99.06(13)  |
| N(3)-Sn(1)-N(2)    | 91.81(12)  |
| N(1)-Sn(1)-S(1)    | 118.91(10) |
| N(4)-Sn(1)-S(1)    | 103.69(10) |
| N(3)-Sn(1)-S(1)    | 162.73(10) |
| N(2)-Sn(1)-S(1)    | 93.17(9)   |
| N(1)-Sn(1)-S(1)#1  | 96.05(10)  |
| N(4)-Sn(1)-S(1)#1  | 105.19(10) |
| N(3)-Sn(1)-S(1)#1  | 90.90(10)  |
| N(2)-Sn(1)-S(1)#1  | 153.19(9)  |
| S(1)-Sn(1)-S(1)#1  | 92.08(4)   |
| N(7)-Sn(2)-N(6)    | 132.85(15) |
| N(7)-Sn(2)-N(5)    | 77.24(15)  |
| N(6)-Sn(2)-N(5)    | 58.93(14)  |
| N(7)-Sn(2)-N(8)    | 59.18(14)  |
| N(6)-Sn(2)-N(8)    | 97.54(14)  |
| N(5)-Sn(2)-N(8)    | 84.40(13)  |
| N(7)-Sn(2)-S(2)    | 120.77(12) |
| N(6)-Sn(2)-S(2)    | 100.09(10) |
| N(5)-Sn(2)-S(2)    | 158.57(10) |
| N(8)-Sn(2)-S(2)    | 95.04(10)  |
| N(7)-Sn(2)-S(2)#2  | 98.24(11)  |
| N(6)-Sn(2)-S(2)#2  | 102.43(10) |
| N(5)-Sn(2)-S(2)#2  | 95.94(10)  |
| N(8)-Sn(2)-S(2)#2  | 156.87(11) |
| S(2)-Sn(2)-S(2)#2  | 92.86(4)   |
| N(7)-Sn(2)-C(51)   | 29.63(14)  |
| N(6)-Sn(2)-C(51)   | 116.03(15) |
| N(5)-Sn(2)-C(51)   | 77.16(14)  |
| N(8)-Sn(2)-C(51)   | 29.71(14)  |
| S(2)-Sn(2)-C(51)   | 112.22(11) |
| S(2)#2-Sn(2)-C(51) | 127.86(12) |
| C(64)-O(1)-C(61)   | 105.8(6)   |

---

Symmetry transformations used to generate equivalent atoms:

#1 -x,-y+1,-z+2      #2 -x,-y,-z+1

Table S28. Anisotropic displacement parameters ( $\text{\AA}^2 \times 10^3$ ) for R200.  
The anisotropic displacement factor exponent takes the form:  
 $-2 \pi^2 [ h^2 a^{*2} U_{11} + \dots + 2 h k a^* b^* U_{12} ]$

|       | U11   | U22    | U33    | U23    | U13    | U12    |
|-------|-------|--------|--------|--------|--------|--------|
| C(1)  | 28(2) | 45(3)  | 24(2)  | 7(2)   | -3(2)  | -4(2)  |
| C(2)  | 48(3) | 34(3)  | 64(4)  | 13(3)  | 3(3)   | 0(2)   |
| C(3)  | 54(4) | 40(3)  | 94(5)  | 16(3)  | -3(4)  | -13(3) |
| C(4)  | 38(3) | 57(4)  | 74(4)  | 18(3)  | 0(3)   | -15(3) |
| C(5)  | 33(3) | 55(3)  | 38(3)  | 11(2)  | 3(2)   | -5(2)  |
| C(6)  | 30(3) | 73(4)  | 48(3)  | 9(3)   | 1(2)   | -4(3)  |
| C(7)  | 25(3) | 83(5)  | 52(3)  | 7(3)   | 2(2)   | 14(3)  |
| C(8)  | 25(2) | 55(3)  | 48(3)  | 10(3)  | 7(2)   | 10(2)  |
| C(9)  | 26(2) | 49(3)  | 22(2)  | 3(2)   | 4(2)   | 7(2)   |
| C(10) | 28(2) | 38(3)  | 27(2)  | 7(2)   | 2(2)   | -1(2)  |
| C(11) | 38(3) | 36(3)  | 29(2)  | 7(2)   | 7(2)   | 15(2)  |
| C(12) | 52(3) | 48(3)  | 32(3)  | 14(2)  | 6(2)   | 5(3)   |
| C(13) | 30(2) | 31(2)  | 30(2)  | 5(2)   | 2(2)   | 8(2)   |
| C(14) | 38(3) | 41(3)  | 31(2)  | 11(2)  | 6(2)   | 17(2)  |
| C(15) | 35(3) | 47(3)  | 52(3)  | 11(3)  | -8(2)  | 16(2)  |
| C(16) | 52(3) | 43(3)  | 41(3)  | -4(2)  | -16(2) | 12(3)  |
| C(17) | 51(3) | 50(3)  | 39(3)  | -9(2)  | -6(2)  | 22(3)  |
| C(18) | 35(2) | 38(3)  | 34(3)  | -2(2)  | 2(2)   | 13(2)  |
| C(19) | 55(3) | 67(4)  | 43(3)  | 13(3)  | 9(3)   | 39(3)  |
| C(20) | 43(3) | 68(4)  | 50(3)  | -4(3)  | 9(3)   | 27(3)  |
| C(21) | 31(2) | 33(3)  | 34(2)  | 4(2)   | 8(2)   | 10(2)  |
| C(22) | 38(3) | 48(3)  | 86(4)  | 14(3)  | 21(3)  | 22(3)  |
| C(23) | 22(2) | 26(2)  | 56(3)  | 4(2)   | 4(2)   | 10(2)  |
| C(24) | 35(3) | 29(3)  | 64(3)  | 12(2)  | 10(2)  | 13(2)  |
| C(25) | 42(3) | 37(3)  | 76(4)  | 24(3)  | 13(3)  | 15(2)  |
| C(26) | 33(3) | 34(3)  | 99(5)  | 24(3)  | 6(3)   | 6(2)   |
| C(27) | 32(3) | 30(3)  | 89(5)  | -2(3)  | -11(3) | 6(2)   |
| C(28) | 31(3) | 36(3)  | 62(4)  | 1(3)   | -3(2)  | 11(2)  |
| C(29) | 77(4) | 42(3)  | 52(3)  | 13(3)  | 11(3)  | 22(3)  |
| C(30) | 54(3) | 50(3)  | 61(4)  | -6(3)  | -7(3)  | 11(3)  |
| C(31) | 34(3) | 39(3)  | 45(3)  | 5(2)   | 10(2)  | 7(2)   |
| C(32) | 48(3) | 37(3)  | 68(4)  | 4(3)   | 6(3)   | 8(3)   |
| C(33) | 54(4) | 44(4)  | 97(5)  | -10(4) | 10(4)  | 6(3)   |
| C(34) | 41(3) | 65(4)  | 71(4)  | -18(4) | 7(3)   | 0(3)   |
| C(35) | 31(3) | 76(4)  | 47(3)  | -3(3)  | 11(2)  | 10(3)  |
| C(36) | 57(4) | 109(6) | 42(4)  | -5(4)  | 6(3)   | 24(4)  |
| C(37) | 60(4) | 137(7) | 30(3)  | 11(4)  | -1(3)  | 31(4)  |
| C(38) | 63(4) | 106(5) | 38(3)  | 25(3)  | 1(3)   | 39(4)  |
| C(39) | 30(2) | 60(3)  | 39(3)  | 16(3)  | 8(2)   | 13(2)  |
| C(40) | 31(3) | 55(3)  | 39(3)  | 5(2)   | 10(2)  | 8(2)   |
| C(41) | 37(3) | 38(3)  | 36(3)  | 16(2)  | 10(2)  | 17(2)  |
| C(42) | 66(4) | 47(3)  | 57(4)  | 13(3)  | 2(3)   | 30(3)  |
| C(43) | 43(3) | 44(3)  | 45(3)  | 13(2)  | -7(2)  | 19(2)  |
| C(44) | 38(3) | 81(4)  | 63(4)  | 36(3)  | -4(3)  | 23(3)  |
| C(45) | 46(4) | 106(6) | 103(6) | 51(5)  | -16(4) | 15(4)  |

|        |         |          |          |         |         |         |
|--------|---------|----------|----------|---------|---------|---------|
| C (46) | 67 (5)  | 72 (5)   | 100 (6)  | 27 (4)  | -44 (5) | -5 (4)  |
| C (47) | 87 (5)  | 56 (4)   | 60 (4)   | 5 (3)   | -28 (4) | 19 (4)  |
| C (48) | 62 (4)  | 49 (3)   | 44 (3)   | 4 (3)   | -12 (3) | 25 (3)  |
| C (49) | 61 (4)  | 164 (8)  | 86 (5)   | 65 (5)  | 29 (4)  | 69 (5)  |
| C (50) | 92 (5)  | 85 (5)   | 42 (3)   | -6 (3)  | 5 (3)   | 42 (4)  |
| C (51) | 30 (2)  | 41 (3)   | 47 (3)   | 8 (2)   | 5 (2)   | 17 (2)  |
| C (52) | 27 (3)  | 78 (4)   | 59 (4)   | 9 (3)   | 5 (2)   | 11 (3)  |
| C (53) | 26 (2)  | 49 (3)   | 41 (3)   | -3 (2)  | 7 (2)   | 6 (2)   |
| C (54) | 23 (2)  | 48 (3)   | 84 (4)   | -19 (3) | 2 (3)   | 3 (2)   |
| C (55) | 31 (3)  | 91 (5)   | 91 (5)   | -50 (4) | 14 (3)  | 2 (3)   |
| C (56) | 41 (4)  | 147 (8)  | 52 (4)   | -37 (5) | 10 (3)  | 7 (4)   |
| C (57) | 45 (3)  | 104 (6)  | 43 (4)   | 7 (4)   | 5 (3)   | 1 (4)   |
| C (58) | 35 (3)  | 69 (4)   | 41 (3)   | 5 (3)   | 8 (2)   | 9 (3)   |
| C (59) | 49 (4)  | 41 (4)   | 177 (8)  | 10 (4)  | 40 (4)  | 14 (3)  |
| C (60) | 69 (4)  | 65 (4)   | 64 (4)   | 32 (3)  | 24 (3)  | 20 (3)  |
| C (61) | 107 (7) | 126 (8)  | 137 (8)  | 25 (6)  | 25 (6)  | 68 (6)  |
| C (62) | 118 (8) | 194 (11) | 127 (9)  | -94 (8) | -55 (7) | 106 (8) |
| C (63) | 81 (6)  | 44 (4)   | 176 (10) | 15 (5)  | -34 (6) | 5 (4)   |
| C (64) | 130 (8) | 159 (9)  | 88 (6)   | 13 (6)  | -8 (6)  | 93 (7)  |
| N (1)  | 32 (2)  | 29 (2)   | 30 (2)   | 7 (2)   | 6 (2)   | 5 (2)   |
| N (2)  | 27 (2)  | 33 (2)   | 25 (2)   | 5 (2)   | 5 (2)   | 8 (2)   |
| N (3)  | 23 (2)  | 33 (2)   | 32 (2)   | 1 (2)   | 6 (2)   | 7 (2)   |
| N (4)  | 28 (2)  | 24 (2)   | 45 (2)   | 6 (2)   | 10 (2)  | 10 (2)  |
| N (5)  | 32 (2)  | 32 (2)   | 39 (2)   | 10 (2)  | 4 (2)   | 10 (2)  |
| N (6)  | 34 (2)  | 30 (2)   | 36 (2)   | 6 (2)   | 2 (2)   | 16 (2)  |
| N (7)  | 32 (2)  | 55 (3)   | 35 (2)   | 16 (2)  | 8 (2)   | 17 (2)  |
| N (8)  | 34 (2)  | 35 (2)   | 44 (2)   | 7 (2)   | 13 (2)  | 11 (2)  |
| S (1)  | 24 (1)  | 32 (1)   | 29 (1)   | 3 (1)   | 3 (1)   | 6 (1)   |
| S (2)  | 37 (1)  | 34 (1)   | 40 (1)   | 7 (1)   | 13 (1)  | 14 (1)  |
| Sn (1) | 25 (1)  | 24 (1)   | 27 (1)   | 4 (1)   | 5 (1)   | 6 (1)   |
| Sn (2) | 26 (1)  | 32 (1)   | 35 (1)   | 10 (1)  | 6 (1)   | 12 (1)  |
| O (1)  | 88 (4)  | 234 (8)  | 82 (4)   | 11 (4)  | 0 (3)   | 92 (5)  |

---

# Crystal data and structure refinement of compound 2a

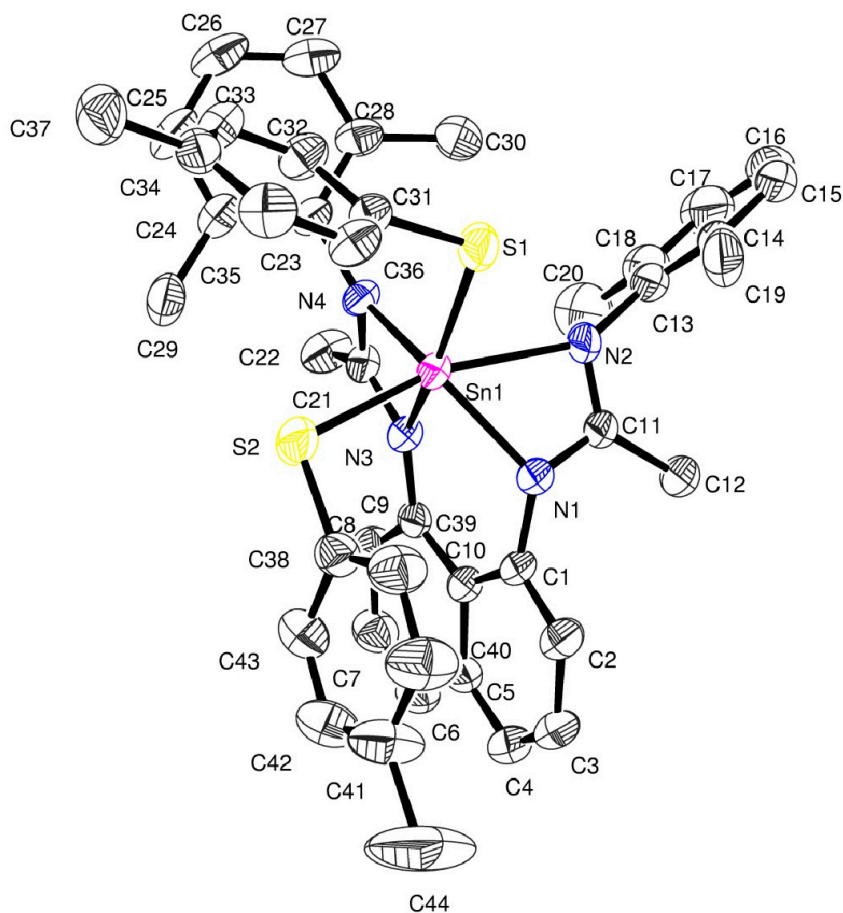

Figure S11. Asymmetric unit

Table S29. Crystal data and structure refinement for R202.

|                             |                    |                        |
|-----------------------------|--------------------|------------------------|
| Identification code         | R202               |                        |
| Empirical formula           | C44 H44 N4 S2 Sn   |                        |
| Formula weight              | 811.64             |                        |
| Temperature                 | 193 (2) K          |                        |
| Wavelength                  | 0.71073 Å          |                        |
| Crystal system, space group | Monoclinic, P 21/c |                        |
| Unit cell dimensions        | a = 19.655 (17) Å  | alpha = 90 deg.        |
|                             | b = 11.760 (8) Å   | beta = 104.67 (4) deg. |
|                             | c = 20.040 (17) Å  | gamma = 90 deg.        |

|                                   |                                             |
|-----------------------------------|---------------------------------------------|
| Volume                            | 4481(6) Å <sup>3</sup>                      |
| Z, Calculated density             | 4, 1.203 Mg/m <sup>3</sup>                  |
| Absorption coefficient            | 0.695 mm <sup>-1</sup>                      |
| F(000)                            | 1672                                        |
| Crystal size                      | 0.120 x 0.060 x 0.060 mm                    |
| Theta range for data collection   | 2.723 to 29.596 deg.                        |
| Limiting indices                  | -26<=h<=27, -16<=k<=16,<br>-27<=l<=27       |
| Reflections collected / unique    | 124683 / 12518 [R(int) = 0.1184]            |
| Completeness to theta = 25.242    | 99.5 %                                      |
| Refinement method                 | Full-matrix least-squares on F <sup>2</sup> |
| Data / restraints / parameters    | 12518 / 0 / 468                             |
| Goodness-of-fit on F <sup>2</sup> | 0.996                                       |
| Final R indices [I>2sigma(I)]     | R1 = 0.0473, wR2 = 0.1191                   |
| R indices (all data)              | R1 = 0.0947, wR2 = 0.1422                   |
| Largest diff. peak and hole       | 0.537 and -0.874 e.Å <sup>-3</sup>          |



Table S30. Atomic coordinates ( $\times 10^4$ ) and equivalent isotropic displacement parameters ( $\text{\AA}^2 \times 10^3$ ) for R202.  
 $U(\text{eq})$  is defined as one third of the trace of the orthogonalized  $U_{ij}$  tensor.

|       | x       | y        | z       | $U(\text{eq})$ |
|-------|---------|----------|---------|----------------|
| C(1)  | 1960(2) | 7174(3)  | 5651(2) | 40(1)          |
| C(2)  | 1523(2) | 7951(3)  | 5862(2) | 49(1)          |
| C(3)  | 1459(2) | 9075(3)  | 5605(2) | 55(1)          |
| C(4)  | 1823(2) | 9403(3)  | 5142(2) | 52(1)          |
| C(5)  | 2296(2) | 8642(3)  | 4937(2) | 41(1)          |
| C(6)  | 2675(2) | 9027(3)  | 4466(2) | 47(1)          |
| C(7)  | 3132(2) | 8320(3)  | 4261(2) | 51(1)          |
| C(8)  | 3244(2) | 7209(3)  | 4523(2) | 44(1)          |
| C(9)  | 2893(2) | 6784(3)  | 4991(2) | 35(1)          |
| C(10) | 2384(2) | 7498(3)  | 5205(2) | 36(1)          |
| C(11) | 1506(2) | 5294(3)  | 5435(2) | 41(1)          |
| C(12) | 849(2)  | 5699(3)  | 4941(2) | 63(1)          |
| C(13) | 1325(2) | 3333(3)  | 5118(2) | 53(1)          |
| C(14) | 865(2)  | 2741(3)  | 5436(3) | 63(1)          |
| C(15) | 478(2)  | 1848(4)  | 5068(4) | 84(2)          |
| C(16) | 538(3)  | 1553(4)  | 4422(4) | 90(2)          |
| C(17) | 989(3)  | 2136(4)  | 4125(3) | 89(2)          |
| C(18) | 1396(2) | 3043(4)  | 4464(2) | 66(1)          |
| C(19) | 777(2)  | 3073(4)  | 6129(3) | 80(2)          |
| C(20) | 1857(3) | 3691(4)  | 4121(2) | 84(2)          |
| C(21) | 3498(2) | 4900(3)  | 5253(2) | 37(1)          |
| C(22) | 3888(2) | 4762(3)  | 4700(2) | 55(1)          |
| C(23) | 4033(2) | 3193(3)  | 5890(2) | 37(1)          |
| C(24) | 4737(2) | 3402(3)  | 6228(2) | 43(1)          |
| C(25) | 5187(2) | 2466(4)  | 6404(2) | 54(1)          |
| C(26) | 4948(2) | 1369(4)  | 6262(2) | 61(1)          |
| C(27) | 4251(2) | 1182(3)  | 5937(2) | 54(1)          |
| C(28) | 3778(2) | 2082(3)  | 5743(2) | 43(1)          |
| C(29) | 5011(2) | 4575(3)  | 6449(2) | 54(1)          |
| C(30) | 3014(2) | 1866(3)  | 5398(2) | 58(1)          |
| C(31) | 3336(2) | 3378(3)  | 7696(2) | 39(1)          |
| C(32) | 3925(2) | 2785(3)  | 7626(2) | 45(1)          |
| C(33) | 4500(2) | 2663(3)  | 8181(2) | 46(1)          |
| C(34) | 4512(2) | 3111(3)  | 8825(2) | 42(1)          |
| C(35) | 3921(2) | 3687(3)  | 8889(2) | 52(1)          |
| C(36) | 3335(2) | 3834(3)  | 8335(2) | 47(1)          |
| C(37) | 5143(2) | 2959(4)  | 9431(2) | 62(1)          |
| C(38) | 3226(2) | 7381(3)  | 7131(2) | 43(1)          |
| C(39) | 2722(2) | 7433(3)  | 7504(2) | 57(1)          |
| C(40) | 2420(3) | 8455(4)  | 7605(2) | 73(1)          |
| C(41) | 2608(3) | 9444(4)  | 7331(3) | 79(2)          |
| C(42) | 3103(3) | 9390(4)  | 6958(2) | 67(1)          |
| C(43) | 3412(2) | 8391(3)  | 6857(2) | 53(1)          |
| C(44) | 2222(4) | 10570(5) | 7417(4) | 153(3)         |

|       |         |         |         |       |
|-------|---------|---------|---------|-------|
| N(1)  | 1928(1) | 6031(2) | 5877(1) | 38(1) |
| N(2)  | 1743(1) | 4257(2) | 5488(2) | 44(1) |
| N(3)  | 3053(1) | 5725(2) | 5316(1) | 35(1) |
| N(4)  | 3544(1) | 4119(2) | 5747(1) | 35(1) |
| S(1)  | 2568(1) | 3477(1) | 7001(1) | 48(1) |
| S(2)  | 3685(1) | 6111(1) | 7058(1) | 57(1) |
| Sn(1) | 2816(1) | 4955(1) | 6249(1) | 34(1) |

---

Table S31. Bond lengths [Å] and angles [deg] for R202.

---

|              |          |
|--------------|----------|
| C(1)-C(2)    | 1.391(5) |
| C(1)-C(10)   | 1.420(5) |
| C(1)-N(1)    | 1.425(4) |
| C(2)-C(3)    | 1.412(5) |
| C(2)-H(2)    | 0.9500   |
| C(3)-C(4)    | 1.362(5) |
| C(3)-H(3)    | 0.9500   |
| C(4)-C(5)    | 1.424(5) |
| C(4)-H(4)    | 0.9500   |
| C(5)-C(6)    | 1.418(5) |
| C(5)-C(10)   | 1.442(4) |
| C(6)-C(7)    | 1.362(5) |
| C(6)-H(6)    | 0.9500   |
| C(7)-C(8)    | 1.404(5) |
| C(7)-H(7)    | 0.9500   |
| C(8)-C(9)    | 1.391(5) |
| C(8)-H(8)    | 0.9500   |
| C(9)-N(3)    | 1.403(4) |
| C(9)-C(10)   | 1.451(5) |
| C(11)-N(2)   | 1.301(4) |
| C(11)-N(1)   | 1.361(4) |
| C(11)-C(12)  | 1.493(5) |
| C(12)-H(12A) | 0.9800   |
| C(12)-H(12B) | 0.9800   |
| C(12)-H(12C) | 0.9800   |
| C(13)-C(18)  | 1.394(6) |
| C(13)-C(14)  | 1.415(6) |
| C(13)-N(2)   | 1.448(5) |
| C(14)-C(15)  | 1.392(6) |
| C(14)-C(19)  | 1.494(7) |
| C(15)-C(16)  | 1.375(8) |
| C(15)-H(15)  | 0.9500   |
| C(16)-C(17)  | 1.369(8) |
| C(16)-H(16)  | 0.9500   |
| C(17)-C(18)  | 1.401(6) |
| C(17)-H(17)  | 0.9500   |
| C(18)-C(20)  | 1.481(6) |
| C(19)-H(19A) | 0.9800   |
| C(19)-H(19B) | 0.9800   |
| C(19)-H(19C) | 0.9800   |
| C(20)-H(20A) | 0.9800   |
| C(20)-H(20B) | 0.9800   |
| C(20)-H(20C) | 0.9800   |
| C(21)-N(3)   | 1.334(4) |
| C(21)-N(4)   | 1.337(4) |
| C(21)-C(22)  | 1.506(5) |
| C(22)-H(22A) | 0.9800   |
| C(22)-H(22B) | 0.9800   |
| C(22)-H(22C) | 0.9800   |
| C(23)-C(24)  | 1.400(5) |
| C(23)-C(28)  | 1.405(5) |

|                 |            |
|-----------------|------------|
| C(23)-N(4)      | 1.432(4)   |
| C(24)-C(25)     | 1.400(5)   |
| C(24)-C(29)     | 1.507(5)   |
| C(25)-C(26)     | 1.378(6)   |
| C(25)-H(25)     | 0.9500     |
| C(26)-C(27)     | 1.377(6)   |
| C(26)-H(26)     | 0.9500     |
| C(27)-C(28)     | 1.398(5)   |
| C(27)-H(27)     | 0.9500     |
| C(28)-C(30)     | 1.506(5)   |
| C(29)-H(29A)    | 0.9800     |
| C(29)-H(29B)    | 0.9800     |
| C(29)-H(29C)    | 0.9800     |
| C(30)-H(30A)    | 0.9800     |
| C(30)-H(30B)    | 0.9800     |
| C(30)-H(30C)    | 0.9800     |
| C(31)-C(36)     | 1.389(5)   |
| C(31)-C(32)     | 1.389(5)   |
| C(31)-S(1)      | 1.779(4)   |
| C(32)-C(33)     | 1.378(5)   |
| C(32)-H(32)     | 0.9500     |
| C(33)-C(34)     | 1.389(5)   |
| C(33)-H(33)     | 0.9500     |
| C(34)-C(35)     | 1.380(5)   |
| C(34)-C(37)     | 1.510(5)   |
| C(35)-C(36)     | 1.393(5)   |
| C(35)-H(35)     | 0.9500     |
| C(36)-H(36)     | 0.9500     |
| C(37)-H(37A)    | 0.9800     |
| C(37)-H(37B)    | 0.9800     |
| C(37)-H(37C)    | 0.9800     |
| C(38)-C(39)     | 1.387(5)   |
| C(38)-C(43)     | 1.395(5)   |
| C(38)-S(2)      | 1.771(4)   |
| C(39)-C(40)     | 1.378(5)   |
| C(39)-H(39)     | 0.9500     |
| C(40)-C(41)     | 1.377(6)   |
| C(40)-H(40)     | 0.9500     |
| C(41)-C(42)     | 1.369(6)   |
| C(41)-C(44)     | 1.558(7)   |
| C(42)-C(43)     | 1.362(6)   |
| C(42)-H(42)     | 0.9500     |
| C(43)-H(43)     | 0.9500     |
| C(44)-H(44A)    | 0.9800     |
| C(44)-H(44B)    | 0.9800     |
| C(44)-H(44C)    | 0.9800     |
| N(1)-Sn(1)      | 2.132(3)   |
| N(2)-Sn(1)      | 2.411(3)   |
| N(3)-Sn(1)      | 2.230(3)   |
| N(4)-Sn(1)      | 2.180(3)   |
| S(1)-Sn(1)      | 2.4297(15) |
| S(2)-Sn(1)      | 2.4483(16) |
| C(2)-C(1)-C(10) | 121.4(3)   |

|                     |          |
|---------------------|----------|
| C(2)-C(1)-N(1)      | 116.2(3) |
| C(10)-C(1)-N(1)     | 122.3(3) |
| C(1)-C(2)-C(3)      | 120.6(4) |
| C(1)-C(2)-H(2)      | 119.7    |
| C(3)-C(2)-H(2)      | 119.7    |
| C(4)-C(3)-C(2)      | 120.0(3) |
| C(4)-C(3)-H(3)      | 120.0    |
| C(2)-C(3)-H(3)      | 120.0    |
| C(3)-C(4)-C(5)      | 120.7(3) |
| C(3)-C(4)-H(4)      | 119.6    |
| C(5)-C(4)-H(4)      | 119.6    |
| C(6)-C(5)-C(4)      | 118.9(3) |
| C(6)-C(5)-C(10)     | 120.7(3) |
| C(4)-C(5)-C(10)     | 120.4(3) |
| C(7)-C(6)-C(5)      | 120.3(3) |
| C(7)-C(6)-H(6)      | 119.9    |
| C(5)-C(6)-H(6)      | 119.9    |
| C(6)-C(7)-C(8)      | 120.6(3) |
| C(6)-C(7)-H(7)      | 119.7    |
| C(8)-C(7)-H(7)      | 119.7    |
| C(9)-C(8)-C(7)      | 122.0(3) |
| C(9)-C(8)-H(8)      | 119.0    |
| C(7)-C(8)-H(8)      | 119.0    |
| C(8)-C(9)-N(3)      | 122.8(3) |
| C(8)-C(9)-C(10)     | 119.2(3) |
| N(3)-C(9)-C(10)     | 117.8(3) |
| C(1)-C(10)-C(5)     | 116.7(3) |
| C(1)-C(10)-C(9)     | 126.1(3) |
| C(5)-C(10)-C(9)     | 117.2(3) |
| N(2)-C(11)-N(1)     | 113.5(3) |
| N(2)-C(11)-C(12)    | 125.8(3) |
| N(1)-C(11)-C(12)    | 120.7(3) |
| C(11)-C(12)-H(12A)  | 109.5    |
| C(11)-C(12)-H(12B)  | 109.5    |
| H(12A)-C(12)-H(12B) | 109.5    |
| C(11)-C(12)-H(12C)  | 109.5    |
| H(12A)-C(12)-H(12C) | 109.5    |
| H(12B)-C(12)-H(12C) | 109.5    |
| C(18)-C(13)-C(14)   | 122.0(4) |
| C(18)-C(13)-N(2)    | 119.0(4) |
| C(14)-C(13)-N(2)    | 118.9(4) |
| C(15)-C(14)-C(13)   | 117.3(5) |
| C(15)-C(14)-C(19)   | 120.8(5) |
| C(13)-C(14)-C(19)   | 121.9(4) |
| C(16)-C(15)-C(14)   | 121.6(5) |
| C(16)-C(15)-H(15)   | 119.2    |
| C(14)-C(15)-H(15)   | 119.2    |
| C(17)-C(16)-C(15)   | 120.1(5) |
| C(17)-C(16)-H(16)   | 120.0    |
| C(15)-C(16)-H(16)   | 120.0    |
| C(16)-C(17)-C(18)   | 121.6(6) |
| C(16)-C(17)-H(17)   | 119.2    |
| C(18)-C(17)-H(17)   | 119.2    |
| C(13)-C(18)-C(17)   | 117.5(5) |

|                     |          |
|---------------------|----------|
| C(13)-C(18)-C(20)   | 122.0(4) |
| C(17)-C(18)-C(20)   | 120.5(5) |
| C(14)-C(19)-H(19A)  | 109.5    |
| C(14)-C(19)-H(19B)  | 109.5    |
| H(19A)-C(19)-H(19B) | 109.5    |
| C(14)-C(19)-H(19C)  | 109.5    |
| H(19A)-C(19)-H(19C) | 109.5    |
| H(19B)-C(19)-H(19C) | 109.5    |
| C(18)-C(20)-H(20A)  | 109.5    |
| C(18)-C(20)-H(20B)  | 109.5    |
| H(20A)-C(20)-H(20B) | 109.5    |
| C(18)-C(20)-H(20C)  | 109.5    |
| H(20A)-C(20)-H(20C) | 109.5    |
| H(20B)-C(20)-H(20C) | 109.5    |
| N(3)-C(21)-N(4)     | 110.6(3) |
| N(3)-C(21)-C(22)    | 128.0(3) |
| N(4)-C(21)-C(22)    | 121.3(3) |
| C(21)-C(22)-H(22A)  | 109.5    |
| C(21)-C(22)-H(22B)  | 109.5    |
| H(22A)-C(22)-H(22B) | 109.5    |
| C(21)-C(22)-H(22C)  | 109.5    |
| H(22A)-C(22)-H(22C) | 109.5    |
| H(22B)-C(22)-H(22C) | 109.5    |
| C(24)-C(23)-C(28)   | 121.4(3) |
| C(24)-C(23)-N(4)    | 119.7(3) |
| C(28)-C(23)-N(4)    | 118.6(3) |
| C(25)-C(24)-C(23)   | 118.0(3) |
| C(25)-C(24)-C(29)   | 119.4(3) |
| C(23)-C(24)-C(29)   | 122.5(3) |
| C(26)-C(25)-C(24)   | 121.5(4) |
| C(26)-C(25)-H(25)   | 119.3    |
| C(24)-C(25)-H(25)   | 119.3    |
| C(27)-C(26)-C(25)   | 119.6(3) |
| C(27)-C(26)-H(26)   | 120.2    |
| C(25)-C(26)-H(26)   | 120.2    |
| C(26)-C(27)-C(28)   | 121.5(4) |
| C(26)-C(27)-H(27)   | 119.2    |
| C(28)-C(27)-H(27)   | 119.2    |
| C(27)-C(28)-C(23)   | 118.0(4) |
| C(27)-C(28)-C(30)   | 121.1(3) |
| C(23)-C(28)-C(30)   | 121.0(3) |
| C(24)-C(29)-H(29A)  | 109.5    |
| C(24)-C(29)-H(29B)  | 109.5    |
| H(29A)-C(29)-H(29B) | 109.5    |
| C(24)-C(29)-H(29C)  | 109.5    |
| H(29A)-C(29)-H(29C) | 109.5    |
| H(29B)-C(29)-H(29C) | 109.5    |
| C(28)-C(30)-H(30A)  | 109.5    |
| C(28)-C(30)-H(30B)  | 109.5    |
| H(30A)-C(30)-H(30B) | 109.5    |
| C(28)-C(30)-H(30C)  | 109.5    |
| H(30A)-C(30)-H(30C) | 109.5    |
| H(30B)-C(30)-H(30C) | 109.5    |
| C(36)-C(31)-C(32)   | 118.8(3) |

|                     |          |
|---------------------|----------|
| C(36)-C(31)-S(1)    | 119.8(3) |
| C(32)-C(31)-S(1)    | 121.2(3) |
| C(33)-C(32)-C(31)   | 120.3(3) |
| C(33)-C(32)-H(32)   | 119.9    |
| C(31)-C(32)-H(32)   | 119.9    |
| C(32)-C(33)-C(34)   | 122.0(3) |
| C(32)-C(33)-H(33)   | 119.0    |
| C(34)-C(33)-H(33)   | 119.0    |
| C(35)-C(34)-C(33)   | 117.1(3) |
| C(35)-C(34)-C(37)   | 121.6(4) |
| C(33)-C(34)-C(37)   | 121.3(4) |
| C(34)-C(35)-C(36)   | 122.2(3) |
| C(34)-C(35)-H(35)   | 118.9    |
| C(36)-C(35)-H(35)   | 118.9    |
| C(31)-C(36)-C(35)   | 119.6(3) |
| C(31)-C(36)-H(36)   | 120.2    |
| C(35)-C(36)-H(36)   | 120.2    |
| C(34)-C(37)-H(37A)  | 109.5    |
| C(34)-C(37)-H(37B)  | 109.5    |
| H(37A)-C(37)-H(37B) | 109.5    |
| C(34)-C(37)-H(37C)  | 109.5    |
| H(37A)-C(37)-H(37C) | 109.5    |
| H(37B)-C(37)-H(37C) | 109.5    |
| C(39)-C(38)-C(43)   | 118.0(3) |
| C(39)-C(38)-S(2)    | 122.0(3) |
| C(43)-C(38)-S(2)    | 119.7(3) |
| C(40)-C(39)-C(38)   | 120.7(4) |
| C(40)-C(39)-H(39)   | 119.7    |
| C(38)-C(39)-H(39)   | 119.7    |
| C(41)-C(40)-C(39)   | 120.6(4) |
| C(41)-C(40)-H(40)   | 119.7    |
| C(39)-C(40)-H(40)   | 119.7    |
| C(42)-C(41)-C(40)   | 118.6(4) |
| C(42)-C(41)-C(44)   | 122.2(5) |
| C(40)-C(41)-C(44)   | 119.1(5) |
| C(43)-C(42)-C(41)   | 121.7(4) |
| C(43)-C(42)-H(42)   | 119.1    |
| C(41)-C(42)-H(42)   | 119.1    |
| C(42)-C(43)-C(38)   | 120.3(4) |
| C(42)-C(43)-H(43)   | 119.8    |
| C(38)-C(43)-H(43)   | 119.8    |
| C(41)-C(44)-H(44A)  | 109.5    |
| C(41)-C(44)-H(44B)  | 109.5    |
| H(44A)-C(44)-H(44B) | 109.5    |
| C(41)-C(44)-H(44C)  | 109.5    |
| H(44A)-C(44)-H(44C) | 109.5    |
| H(44B)-C(44)-H(44C) | 109.5    |
| C(11)-N(1)-C(1)     | 117.5(3) |
| C(11)-N(1)-Sn(1)    | 99.1(2)  |
| C(1)-N(1)-Sn(1)     | 124.9(2) |
| C(11)-N(2)-C(13)    | 121.1(3) |
| C(11)-N(2)-Sn(1)    | 88.3(2)  |
| C(13)-N(2)-Sn(1)    | 150.6(2) |
| C(21)-N(3)-C(9)     | 132.6(3) |

|                  |            |
|------------------|------------|
| C(21)-N(3)-Sn(1) | 93.8(2)    |
| C(9)-N(3)-Sn(1)  | 132.8(2)   |
| C(21)-N(4)-C(23) | 125.9(3)   |
| C(21)-N(4)-Sn(1) | 95.9(2)    |
| C(23)-N(4)-Sn(1) | 137.4(2)   |
| C(31)-S(1)-Sn(1) | 105.59(12) |
| C(38)-S(2)-Sn(1) | 103.78(13) |
| N(1)-Sn(1)-N(4)  | 132.96(11) |
| N(1)-Sn(1)-N(3)  | 78.01(11)  |
| N(4)-Sn(1)-N(3)  | 59.72(10)  |
| N(1)-Sn(1)-N(2)  | 58.27(11)  |
| N(4)-Sn(1)-N(2)  | 97.20(12)  |
| N(3)-Sn(1)-N(2)  | 86.71(11)  |
| N(1)-Sn(1)-S(1)  | 111.48(9)  |
| N(4)-Sn(1)-S(1)  | 102.83(8)  |
| N(3)-Sn(1)-S(1)  | 158.14(7)  |
| N(2)-Sn(1)-S(1)  | 82.44(9)   |
| N(1)-Sn(1)-S(2)  | 105.90(9)  |
| N(4)-Sn(1)-S(2)  | 97.26(9)   |
| N(3)-Sn(1)-S(2)  | 94.06(9)   |
| N(2)-Sn(1)-S(2)  | 163.67(8)  |
| S(1)-Sn(1)-S(2)  | 101.67(7)  |

---

Symmetry transformations used to generate equivalent atoms:



Table S32. Anisotropic displacement parameters ( $\text{\AA}^2 \times 10^3$ ) for R202.  
The anisotropic displacement factor exponent takes the form:  
 $-2 \pi^2 [ h^2 a^{*2} U_{11} + \dots + 2 h k a^* b^* U_{12} ]$

|       | U11    | U22   | U33    | U23    | U13    | U12    |
|-------|--------|-------|--------|--------|--------|--------|
| C(1)  | 29(2)  | 30(2) | 57(2)  | 10(2)  | 2(2)   | 6(1)   |
| C(2)  | 40(2)  | 42(2) | 66(3)  | 9(2)   | 13(2)  | 8(2)   |
| C(3)  | 43(2)  | 38(2) | 86(3)  | 7(2)   | 17(2)  | 11(2)  |
| C(4)  | 44(2)  | 35(2) | 72(3)  | 11(2)  | 8(2)   | 7(2)   |
| C(5)  | 37(2)  | 32(2) | 49(2)  | 5(1)   | -1(2)  | -2(1)  |
| C(6)  | 52(2)  | 36(2) | 50(2)  | 10(2)  | 4(2)   | -1(2)  |
| C(7)  | 57(2)  | 46(2) | 50(2)  | 8(2)   | 14(2)  | -6(2)  |
| C(8)  | 47(2)  | 39(2) | 44(2)  | 4(2)   | 7(2)   | 0(2)   |
| C(9)  | 30(2)  | 32(2) | 37(2)  | 3(1)   | -5(1)  | -3(1)  |
| C(10) | 30(2)  | 32(2) | 41(2)  | 5(1)   | -1(1)  | 2(1)   |
| C(11) | 27(2)  | 34(2) | 55(2)  | 11(2)  | -1(2)  | 0(1)   |
| C(12) | 37(2)  | 42(2) | 91(3)  | 18(2)  | -17(2) | 1(2)   |
| C(13) | 34(2)  | 36(2) | 74(3)  | 6(2)   | -13(2) | 1(2)   |
| C(14) | 30(2)  | 36(2) | 107(4) | 20(2)  | -10(2) | 0(2)   |
| C(15) | 39(2)  | 42(2) | 151(5) | 13(3)  | -16(3) | -1(2)  |
| C(16) | 58(3)  | 46(3) | 139(5) | -4(3)  | -29(3) | -3(2)  |
| C(17) | 71(3)  | 59(3) | 107(4) | -11(3) | -34(3) | 4(3)   |
| C(18) | 55(3)  | 52(2) | 70(3)  | 4(2)   | -20(2) | 2(2)   |
| C(19) | 37(2)  | 78(3) | 118(5) | 32(3)  | 9(3)   | -8(2)  |
| C(20) | 91(4)  | 89(4) | 57(3)  | -1(3)  | -8(3)  | -2(3)  |
| C(21) | 29(2)  | 37(2) | 42(2)  | -1(1)  | 2(1)   | 1(1)   |
| C(22) | 61(3)  | 55(2) | 54(2)  | 9(2)   | 22(2)  | 16(2)  |
| C(23) | 36(2)  | 37(2) | 36(2)  | 0(1)   | 6(1)   | 10(1)  |
| C(24) | 37(2)  | 50(2) | 39(2)  | 0(2)   | 7(2)   | 12(2)  |
| C(25) | 44(2)  | 70(3) | 44(2)  | 1(2)   | 6(2)   | 27(2)  |
| C(26) | 69(3)  | 55(2) | 57(3)  | 4(2)   | 14(2)  | 34(2)  |
| C(27) | 76(3)  | 37(2) | 53(2)  | 3(2)   | 21(2)  | 15(2)  |
| C(28) | 54(2)  | 36(2) | 40(2)  | -2(2)  | 12(2)  | 10(2)  |
| C(29) | 33(2)  | 65(2) | 60(2)  | -9(2)  | 5(2)   | 3(2)   |
| C(30) | 56(3)  | 42(2) | 73(3)  | -14(2) | 9(2)   | -2(2)  |
| C(31) | 37(2)  | 37(2) | 41(2)  | 7(1)   | 6(2)   | 2(1)   |
| C(32) | 48(2)  | 49(2) | 36(2)  | 1(2)   | 8(2)   | 11(2)  |
| C(33) | 39(2)  | 54(2) | 44(2)  | 9(2)   | 12(2)  | 12(2)  |
| C(34) | 41(2)  | 41(2) | 41(2)  | 10(2)  | 3(2)   | -4(2)  |
| C(35) | 64(3)  | 55(2) | 35(2)  | -4(2)  | 13(2)  | 1(2)   |
| C(36) | 48(2)  | 46(2) | 48(2)  | 1(2)   | 14(2)  | 14(2)  |
| C(37) | 55(3)  | 70(3) | 49(2)  | 12(2)  | -5(2)  | -8(2)  |
| C(38) | 45(2)  | 40(2) | 42(2)  | -5(2)  | 7(2)   | -2(2)  |
| C(39) | 69(3)  | 48(2) | 58(3)  | 12(2)  | 27(2)  | 2(2)   |
| C(40) | 99(4)  | 57(3) | 81(3)  | 0(2)   | 55(3)  | 8(2)   |
| C(41) | 117(4) | 39(2) | 91(4)  | -6(2)  | 45(3)  | 5(3)   |
| C(42) | 87(3)  | 42(2) | 75(3)  | 8(2)   | 24(3)  | -10(2) |
| C(43) | 58(2)  | 48(2) | 54(2)  | -1(2)  | 16(2)  | -11(2) |
| C(44) | 228(9) | 47(3) | 225(9) | -10(4) | 133(7) | 29(4)  |
| N(1)  | 30(1)  | 32(1) | 49(2)  | 8(1)   | 3(1)   | 2(1)   |

|        |        |        |        |         |         |        |
|--------|--------|--------|--------|---------|---------|--------|
| N (2)  | 28 (1) | 39 (2) | 56 (2) | 10 (1)  | -4 (1)  | -3 (1) |
| N (3)  | 30 (1) | 33 (1) | 39 (2) | 4 (1)   | 3 (1)   | 3 (1)  |
| N (4)  | 31 (1) | 32 (1) | 39 (2) | 2 (1)   | 4 (1)   | 7 (1)  |
| S (1)  | 35 (1) | 54 (1) | 51 (1) | 14 (1)  | 0 (1)   | -2 (1) |
| S (2)  | 41 (1) | 51 (1) | 66 (1) | -16 (1) | -10 (1) | 4 (1)  |
| Sn (1) | 26 (1) | 33 (1) | 38 (1) | 2 (1)   | 1 (1)   | 4 (1)  |

---

### Crystal data and structure refinement of compound 3b

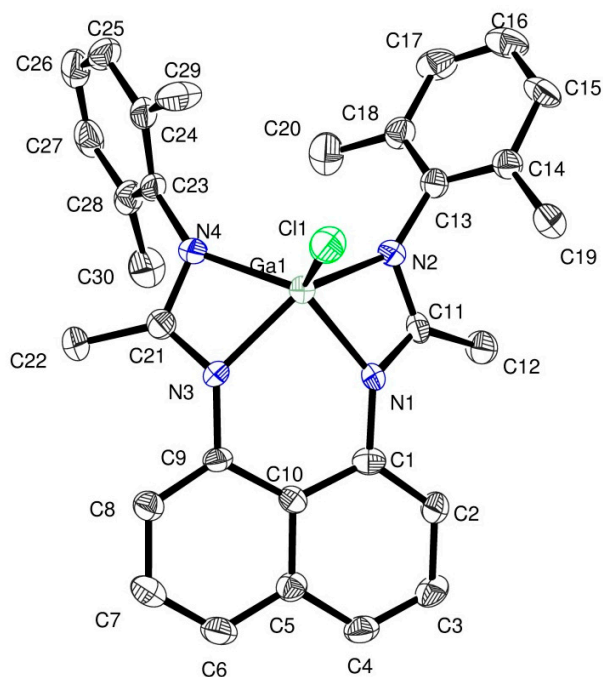

Figure S12. Asymmetric Unit

Table S33. Crystal data and structure refinement for R229.

|                             |                                                                                                                          |  |
|-----------------------------|--------------------------------------------------------------------------------------------------------------------------|--|
| Identification code         | R229                                                                                                                     |  |
| Empirical formula           | C <sub>30</sub> H <sub>30</sub> Cl Ga N <sub>4</sub>                                                                     |  |
| Formula weight              | 551.75                                                                                                                   |  |
| Temperature                 | 193 (2) K                                                                                                                |  |
| Wavelength                  | 0.71073 Å                                                                                                                |  |
| Crystal system, space group | Monoclinic, P 2 <sub>1</sub> /c                                                                                          |  |
| Unit cell dimensions        | a = 10.208 (2) Å    alpha = 90 deg.<br>b = 19.494 (4) Å    beta = 90.929 (7) deg.<br>c = 13.220 (3) Å    gamma = 90 deg. |  |
| Volume                      | 2630.4 (10) Å <sup>3</sup>                                                                                               |  |
| Z, Calculated density       | 4, 1.393 Mg/m <sup>3</sup>                                                                                               |  |
| Absorption coefficient      | 1.174 mm <sup>-1</sup>                                                                                                   |  |

|                                   |                                             |
|-----------------------------------|---------------------------------------------|
| F(000)                            | 1144                                        |
| Crystal size                      | 0.100 x 0.040 x 0.040 mm                    |
| Theta range for data collection   | 3.255 to 24.147 deg.                        |
| Limiting indices                  | -11<=h<=11, -22<=k<=21,<br>-15<=l<=15       |
| Reflections collected / unique    | 26145 / 4150 [R(int) = 0.1436]              |
| Completeness to theta = 24.147    | 98.7 %                                      |
| Refinement method                 | Full-matrix least-squares on F <sup>2</sup> |
| Data / restraints / parameters    | 4150 / 0 / 331                              |
| Goodness-of-fit on F <sup>2</sup> | 1.010                                       |
| Final R indices [I>2sigma(I)]     | R1 = 0.0502, wR2 = 0.0863                   |
| R indices (all data)              | R1 = 0.1078, wR2 = 0.1079                   |
| Largest diff. peak and hole       | 0.447 and -0.523 e.A <sup>-3</sup>          |

Table S34. Atomic coordinates ( $\times 10^4$ ) and equivalent isotropic displacement parameters ( $\text{\AA}^2 \times 10^3$ ) for R229.  
 $U(\text{eq})$  is defined as one third of the trace of the orthogonalized  $U_{ij}$  tensor.

|       | x       | y       | z        | U(eq) |
|-------|---------|---------|----------|-------|
| C(1)  | 794(5)  | 4090(2) | 5502(3)  | 24(1) |
| C(2)  | -495(5) | 4091(3) | 5177(4)  | 29(1) |
| C(3)  | -864(5) | 4177(2) | 4165(4)  | 30(1) |
| C(4)  | 81(5)   | 4279(2) | 3470(4)  | 31(1) |
| C(5)  | 1417(5) | 4316(2) | 3747(4)  | 26(1) |
| C(6)  | 2352(5) | 4442(3) | 2991(4)  | 33(1) |
| C(7)  | 3651(5) | 4491(3) | 3232(4)  | 34(1) |
| C(8)  | 4072(5) | 4419(2) | 4234(4)  | 27(1) |
| C(9)  | 3212(5) | 4270(2) | 5002(3)  | 23(1) |
| C(10) | 1825(5) | 4219(2) | 4782(3)  | 21(1) |
| C(11) | 580(5)  | 3659(2) | 7257(4)  | 24(1) |
| C(12) | -697(5) | 3284(3) | 7223(4)  | 34(1) |
| C(13) | 1038(5) | 3471(2) | 9078(4)  | 26(1) |
| C(14) | 121(5)  | 3868(2) | 9593(4)  | 26(1) |
| C(15) | -103(5) | 3716(3) | 10601(4) | 36(1) |
| C(16) | 541(6)  | 3193(3) | 11090(4) | 43(2) |
| C(17) | 1426(6) | 2799(3) | 10565(4) | 40(2) |
| C(18) | 1695(5) | 2930(3) | 9559(4)  | 31(1) |
| C(19) | -607(5) | 4450(3) | 9077(4)  | 35(1) |
| C(20) | 2662(5) | 2501(3) | 9001(4)  | 46(2) |
| C(21) | 4693(5) | 3837(2) | 6356(4)  | 26(1) |
| C(22) | 5883(5) | 3640(3) | 5775(4)  | 33(1) |
| C(23) | 5439(5) | 3287(3) | 7938(4)  | 28(1) |
| C(24) | 6011(5) | 3565(3) | 8807(4)  | 32(1) |
| C(25) | 6882(5) | 3166(3) | 9366(4)  | 40(2) |
| C(26) | 7205(5) | 2516(3) | 9069(4)  | 43(2) |
| C(27) | 6589(5) | 2231(3) | 8240(4)  | 40(2) |
| C(28) | 5671(5) | 2600(3) | 7668(4)  | 32(1) |
| C(29) | 5666(6) | 4275(3) | 9151(4)  | 46(2) |
| C(30) | 4939(6) | 2248(3) | 6824(4)  | 45(2) |
| N(1)  | 1147(4) | 4005(2) | 6526(3)  | 24(1) |
| N(2)  | 1397(4) | 3646(2) | 8065(3)  | 25(1) |
| N(3)  | 3659(4) | 4180(2) | 6006(3)  | 24(1) |
| N(4)  | 4550(4) | 3696(2) | 7342(3)  | 25(1) |
| Cl(1) | 2899(1) | 5202(1) | 8016(1)  | 35(1) |
| Ga(1) | 2771(1) | 4185(1) | 7328(1)  | 24(1) |

Table S35. Bond lengths [Å] and angles [deg] for R229.

---

|              |          |
|--------------|----------|
| C(1)-C(2)    | 1.378(6) |
| C(1)-N(1)    | 1.406(6) |
| C(1)-C(10)   | 1.452(6) |
| C(2)-C(3)    | 1.394(6) |
| C(2)-H(2)    | 0.9500   |
| C(3)-C(4)    | 1.359(6) |
| C(3)-H(3)    | 0.9500   |
| C(4)-C(5)    | 1.408(7) |
| C(4)-H(4)    | 0.9500   |
| C(5)-C(6)    | 1.414(6) |
| C(5)-C(10)   | 1.437(6) |
| C(6)-C(7)    | 1.362(7) |
| C(6)-H(6)    | 0.9500   |
| C(7)-C(8)    | 1.393(7) |
| C(7)-H(7)    | 0.9500   |
| C(8)-C(9)    | 1.384(6) |
| C(8)-H(8)    | 0.9500   |
| C(9)-N(3)    | 1.408(6) |
| C(9)-C(10)   | 1.445(6) |
| C(11)-N(1)   | 1.320(5) |
| C(11)-N(2)   | 1.345(6) |
| C(11)-C(12)  | 1.494(6) |
| C(11)-Ga(1)  | 2.462(5) |
| C(12)-H(12A) | 0.9800   |
| C(12)-H(12B) | 0.9800   |
| C(12)-H(12C) | 0.9800   |
| C(13)-C(18)  | 1.397(7) |
| C(13)-C(14)  | 1.399(6) |
| C(13)-N(2)   | 1.435(6) |
| C(14)-C(15)  | 1.388(6) |
| C(14)-C(19)  | 1.513(7) |
| C(15)-C(16)  | 1.370(7) |
| C(15)-H(15)  | 0.9500   |
| C(16)-C(17)  | 1.382(7) |
| C(16)-H(16)  | 0.9500   |
| C(17)-C(18)  | 1.386(7) |
| C(17)-H(17)  | 0.9500   |
| C(18)-C(20)  | 1.498(7) |
| C(19)-H(19A) | 0.9800   |
| C(19)-H(19B) | 0.9800   |
| C(19)-H(19C) | 0.9800   |
| C(20)-H(20A) | 0.9800   |
| C(20)-H(20B) | 0.9800   |
| C(20)-H(20C) | 0.9800   |
| C(21)-N(3)   | 1.327(6) |
| C(21)-N(4)   | 1.342(6) |
| C(21)-C(22)  | 1.498(6) |
| C(21)-Ga(1)  | 2.458(5) |
| C(22)-H(22A) | 0.9800   |
| C(22)-H(22B) | 0.9800   |
| C(22)-H(22C) | 0.9800   |

|                     |            |
|---------------------|------------|
| C(23) - C(24)       | 1.391(7)   |
| C(23) - C(28)       | 1.407(7)   |
| C(23) - N(4)        | 1.433(6)   |
| C(24) - C(25)       | 1.385(7)   |
| C(24) - C(29)       | 1.501(7)   |
| C(25) - C(26)       | 1.368(8)   |
| C(25) - H(25)       | 0.9500     |
| C(26) - C(27)       | 1.373(8)   |
| C(26) - H(26)       | 0.9500     |
| C(27) - C(28)       | 1.395(7)   |
| C(27) - H(27)       | 0.9500     |
| C(28) - C(30)       | 1.499(7)   |
| C(29) - H(29A)      | 0.9800     |
| C(29) - H(29B)      | 0.9800     |
| C(29) - H(29C)      | 0.9800     |
| C(30) - H(30A)      | 0.9800     |
| C(30) - H(30B)      | 0.9800     |
| C(30) - H(30C)      | 0.9800     |
| N(1) - Ga(1)        | 1.984(4)   |
| N(2) - Ga(1)        | 2.017(4)   |
| N(3) - Ga(1)        | 1.981(4)   |
| N(4) - Ga(1)        | 2.051(4)   |
| Cl(1) - Ga(1)       | 2.1828(14) |
|                     |            |
| C(2) - C(1) - N(1)  | 121.9(4)   |
| C(2) - C(1) - C(10) | 119.6(4)   |
| N(1) - C(1) - C(10) | 118.3(4)   |
| C(1) - C(2) - C(3)  | 122.7(5)   |
| C(1) - C(2) - H(2)  | 118.6      |
| C(3) - C(2) - H(2)  | 118.6      |
| C(4) - C(3) - C(2)  | 118.9(5)   |
| C(4) - C(3) - H(3)  | 120.5      |
| C(2) - C(3) - H(3)  | 120.5      |
| C(3) - C(4) - C(5)  | 121.8(5)   |
| C(3) - C(4) - H(4)  | 119.1      |
| C(5) - C(4) - H(4)  | 119.1      |
| C(4) - C(5) - C(6)  | 119.1(5)   |
| C(4) - C(5) - C(10) | 120.3(4)   |
| C(6) - C(5) - C(10) | 120.5(4)   |
| C(7) - C(6) - C(5)  | 120.8(5)   |
| C(7) - C(6) - H(6)  | 119.6      |
| C(5) - C(6) - H(6)  | 119.6      |
| C(6) - C(7) - C(8)  | 119.9(5)   |
| C(6) - C(7) - H(7)  | 120.0      |
| C(8) - C(7) - H(7)  | 120.0      |
| C(9) - C(8) - C(7)  | 122.0(5)   |
| C(9) - C(8) - H(8)  | 119.0      |
| C(7) - C(8) - H(8)  | 119.0      |
| C(8) - C(9) - N(3)  | 121.3(4)   |
| C(8) - C(9) - C(10) | 119.9(4)   |
| N(3) - C(9) - C(10) | 118.8(4)   |
| C(5) - C(10) - C(9) | 116.7(4)   |
| C(5) - C(10) - C(1) | 116.5(4)   |
| C(9) - C(10) - C(1) | 126.8(4)   |

|                     |          |
|---------------------|----------|
| N(1)-C(11)-N(2)     | 108.5(4) |
| N(1)-C(11)-C(12)    | 128.4(5) |
| N(2)-C(11)-C(12)    | 122.9(4) |
| N(1)-C(11)-Ga(1)    | 53.5(2)  |
| N(2)-C(11)-Ga(1)    | 55.0(2)  |
| C(12)-C(11)-Ga(1)   | 175.4(4) |
| C(11)-C(12)-H(12A)  | 109.5    |
| C(11)-C(12)-H(12B)  | 109.5    |
| H(12A)-C(12)-H(12B) | 109.5    |
| C(11)-C(12)-H(12C)  | 109.5    |
| H(12A)-C(12)-H(12C) | 109.5    |
| H(12B)-C(12)-H(12C) | 109.5    |
| C(18)-C(13)-C(14)   | 121.1(5) |
| C(18)-C(13)-N(2)    | 118.4(4) |
| C(14)-C(13)-N(2)    | 120.3(4) |
| C(15)-C(14)-C(13)   | 118.1(5) |
| C(15)-C(14)-C(19)   | 120.4(5) |
| C(13)-C(14)-C(19)   | 121.6(4) |
| C(16)-C(15)-C(14)   | 121.8(5) |
| C(16)-C(15)-H(15)   | 119.1    |
| C(14)-C(15)-H(15)   | 119.1    |
| C(15)-C(16)-C(17)   | 119.3(5) |
| C(15)-C(16)-H(16)   | 120.4    |
| C(17)-C(16)-H(16)   | 120.4    |
| C(16)-C(17)-C(18)   | 121.4(5) |
| C(16)-C(17)-H(17)   | 119.3    |
| C(18)-C(17)-H(17)   | 119.3    |
| C(17)-C(18)-C(13)   | 118.4(5) |
| C(17)-C(18)-C(20)   | 120.7(5) |
| C(13)-C(18)-C(20)   | 120.9(5) |
| C(14)-C(19)-H(19A)  | 109.5    |
| C(14)-C(19)-H(19B)  | 109.5    |
| H(19A)-C(19)-H(19B) | 109.5    |
| C(14)-C(19)-H(19C)  | 109.5    |
| H(19A)-C(19)-H(19C) | 109.5    |
| H(19B)-C(19)-H(19C) | 109.5    |
| C(18)-C(20)-H(20A)  | 109.5    |
| C(18)-C(20)-H(20B)  | 109.5    |
| H(20A)-C(20)-H(20B) | 109.5    |
| C(18)-C(20)-H(20C)  | 109.5    |
| H(20A)-C(20)-H(20C) | 109.5    |
| H(20B)-C(20)-H(20C) | 109.5    |
| N(3)-C(21)-N(4)     | 110.1(4) |
| N(3)-C(21)-C(22)    | 126.7(4) |
| N(4)-C(21)-C(22)    | 123.2(5) |
| N(3)-C(21)-Ga(1)    | 53.5(2)  |
| N(4)-C(21)-Ga(1)    | 56.6(2)  |
| C(22)-C(21)-Ga(1)   | 178.5(4) |
| C(21)-C(22)-H(22A)  | 109.5    |
| C(21)-C(22)-H(22B)  | 109.5    |
| H(22A)-C(22)-H(22B) | 109.5    |
| C(21)-C(22)-H(22C)  | 109.5    |
| H(22A)-C(22)-H(22C) | 109.5    |
| H(22B)-C(22)-H(22C) | 109.5    |



|                     |            |
|---------------------|------------|
| C(24)-C(23)-C(28)   | 120.7(5)   |
| C(24)-C(23)-N(4)    | 119.4(5)   |
| C(28)-C(23)-N(4)    | 119.9(5)   |
| C(25)-C(24)-C(23)   | 118.7(5)   |
| C(25)-C(24)-C(29)   | 120.5(5)   |
| C(23)-C(24)-C(29)   | 120.8(5)   |
| C(26)-C(25)-C(24)   | 121.5(6)   |
| C(26)-C(25)-H(25)   | 119.3      |
| C(24)-C(25)-H(25)   | 119.3      |
| C(25)-C(26)-C(27)   | 119.7(6)   |
| C(25)-C(26)-H(26)   | 120.2      |
| C(27)-C(26)-H(26)   | 120.2      |
| C(26)-C(27)-C(28)   | 121.3(5)   |
| C(26)-C(27)-H(27)   | 119.4      |
| C(28)-C(27)-H(27)   | 119.4      |
| C(27)-C(28)-C(23)   | 117.9(5)   |
| C(27)-C(28)-C(30)   | 119.3(5)   |
| C(23)-C(28)-C(30)   | 122.7(5)   |
| C(24)-C(29)-H(29A)  | 109.5      |
| C(24)-C(29)-H(29B)  | 109.5      |
| H(29A)-C(29)-H(29B) | 109.5      |
| C(24)-C(29)-H(29C)  | 109.5      |
| H(29A)-C(29)-H(29C) | 109.5      |
| H(29B)-C(29)-H(29C) | 109.5      |
| C(28)-C(30)-H(30A)  | 109.5      |
| C(28)-C(30)-H(30B)  | 109.5      |
| H(30A)-C(30)-H(30B) | 109.5      |
| C(28)-C(30)-H(30C)  | 109.5      |
| H(30A)-C(30)-H(30C) | 109.5      |
| H(30B)-C(30)-H(30C) | 109.5      |
| C(11)-N(1)-C(1)     | 131.0(4)   |
| C(11)-N(1)-Ga(1)    | 94.2(3)    |
| C(1)-N(1)-Ga(1)     | 133.8(3)   |
| C(11)-N(2)-C(13)    | 125.6(4)   |
| C(11)-N(2)-Ga(1)    | 91.9(3)    |
| C(13)-N(2)-Ga(1)    | 139.9(3)   |
| C(21)-N(3)-C(9)     | 129.4(4)   |
| C(21)-N(3)-Ga(1)    | 93.9(3)    |
| C(9)-N(3)-Ga(1)     | 133.3(3)   |
| C(21)-N(4)-C(23)    | 124.7(4)   |
| C(21)-N(4)-Ga(1)    | 90.3(3)    |
| C(23)-N(4)-Ga(1)    | 144.7(3)   |
| N(3)-Ga(1)-N(1)     | 85.32(15)  |
| N(3)-Ga(1)-N(2)     | 139.06(16) |
| N(1)-Ga(1)-N(2)     | 65.43(16)  |
| N(3)-Ga(1)-N(4)     | 65.69(15)  |
| N(1)-Ga(1)-N(4)     | 130.88(15) |
| N(2)-Ga(1)-N(4)     | 112.06(16) |
| N(3)-Ga(1)-Cl(1)    | 110.32(12) |
| N(1)-Ga(1)-Cl(1)    | 115.30(11) |
| N(2)-Ga(1)-Cl(1)    | 107.98(12) |
| N(4)-Ga(1)-Cl(1)    | 111.79(12) |
| N(3)-Ga(1)-C(21)    | 32.59(15)  |
| N(1)-Ga(1)-C(21)    | 109.82(16) |

|                   |            |
|-------------------|------------|
| N(2)-Ga(1)-C(21)  | 132.52(16) |
| N(4)-Ga(1)-C(21)  | 33.10(15)  |
| Cl(1)-Ga(1)-C(21) | 115.20(12) |
| N(3)-Ga(1)-C(11)  | 113.13(16) |
| N(1)-Ga(1)-C(11)  | 32.32(15)  |
| N(2)-Ga(1)-C(11)  | 33.11(15)  |
| N(4)-Ga(1)-C(11)  | 127.61(16) |
| Cl(1)-Ga(1)-C(11) | 116.26(11) |
| C(21)-Ga(1)-C(11) | 126.69(16) |

---

Symmetry transformations used to generate equivalent atoms:

Table S36. Anisotropic displacement parameters ( $\text{\AA}^2 \times 10^3$ ) for R229. The anisotropic displacement factor exponent takes the form:  $-2 \pi^2 [ h^2 a^{*2} U_{11} + \dots + 2 h k a^* b^* U_{12} ]$

|       | U11   | U22   | U33   | U23    | U13    | U12    |
|-------|-------|-------|-------|--------|--------|--------|
| C(1)  | 30(3) | 21(3) | 22(3) | -4(2)  | -4(2)  | -4(2)  |
| C(2)  | 20(3) | 38(3) | 29(3) | -1(3)  | 1(2)   | -4(3)  |
| C(3)  | 25(3) | 32(3) | 31(3) | -10(3) | -10(3) | -4(3)  |
| C(4)  | 34(3) | 34(3) | 23(3) | -3(3)  | -7(3)  | 5(3)   |
| C(5)  | 26(3) | 26(3) | 24(3) | -4(2)  | -3(2)  | -1(2)  |
| C(6)  | 40(4) | 38(3) | 20(3) | 2(2)   | -1(3)  | 2(3)   |
| C(7)  | 41(4) | 37(3) | 23(3) | 3(3)   | 6(3)   | 0(3)   |
| C(8)  | 27(3) | 30(3) | 24(3) | -1(2)  | 1(2)   | -2(2)  |
| C(9)  | 23(3) | 28(3) | 18(3) | 0(2)   | -4(2)  | -2(2)  |
| C(10) | 25(3) | 18(3) | 19(3) | -3(2)  | 2(2)   | 0(2)   |
| C(11) | 19(3) | 27(3) | 25(3) | -6(3)  | 6(3)   | -2(2)  |
| C(12) | 29(3) | 41(3) | 33(3) | 2(3)   | 2(3)   | -10(3) |
| C(13) | 21(3) | 30(3) | 26(3) | 1(3)   | 1(2)   | -7(3)  |
| C(14) | 26(3) | 28(3) | 25(3) | 1(2)   | 1(3)   | -4(3)  |
| C(15) | 44(4) | 45(4) | 20(3) | -1(3)  | 8(3)   | -12(3) |
| C(16) | 57(4) | 46(4) | 25(3) | 7(3)   | 1(3)   | -13(3) |
| C(17) | 47(4) | 38(4) | 35(3) | 16(3)  | -7(3)  | -6(3)  |
| C(18) | 28(3) | 30(3) | 33(3) | 6(3)   | 0(3)   | 1(3)   |
| C(19) | 35(3) | 42(3) | 29(3) | -3(3)  | 7(3)   | 2(3)   |
| C(20) | 42(4) | 40(4) | 58(4) | 15(3)  | 9(3)   | 4(3)   |
| C(21) | 24(3) | 29(3) | 25(3) | -3(2)  | 0(3)   | -6(3)  |
| C(22) | 25(3) | 45(3) | 30(3) | -2(3)  | 7(3)   | 3(3)   |
| C(23) | 19(3) | 39(4) | 25(3) | 11(3)  | 1(3)   | 3(3)   |
| C(24) | 21(3) | 44(4) | 29(3) | 8(3)   | 4(3)   | 1(3)   |
| C(25) | 28(3) | 57(4) | 34(3) | 19(3)  | -5(3)  | -2(3)  |
| C(26) | 29(3) | 55(4) | 46(4) | 29(3)  | 9(3)   | 8(3)   |
| C(27) | 35(4) | 42(4) | 42(4) | 16(3)  | 14(3)  | 5(3)   |
| C(28) | 25(3) | 33(3) | 39(3) | 4(3)   | 1(3)   | -5(3)  |
| C(29) | 54(4) | 55(4) | 30(3) | 0(3)   | -15(3) | 4(3)   |
| C(30) | 47(4) | 39(4) | 51(4) | 1(3)   | 6(3)   | 2(3)   |
| N(1)  | 19(2) | 33(3) | 20(2) | 4(2)   | 5(2)   | 1(2)   |
| N(2)  | 24(2) | 32(3) | 20(2) | 4(2)   | 1(2)   | -1(2)  |
| N(3)  | 18(2) | 33(2) | 21(2) | 1(2)   | -2(2)  | 4(2)   |
| N(4)  | 25(3) | 30(3) | 19(2) | -1(2)  | 0(2)   | 3(2)   |
| Cl(1) | 33(1) | 35(1) | 36(1) | -7(1)  | -3(1)  | 3(1)   |
| Ga(1) | 19(1) | 30(1) | 21(1) | 0(1)   | 1(1)   | 0(1)   |

## Calculations

Calculations were performed with the Gaussian 16 suite of programs<sup>1</sup> using the density functional method B3LYP with dispersion (D3).<sup>2, 3</sup> Tin atom was treated with a Stuttgart-Dresden pseudopotential in combination with its adapted basis set.<sup>4</sup> All other atoms have been described with a 6-31G(d,p) basis set. Geometry optimisations were carried out without any symmetry restrictions. Frequency calculations were undertaken to confirm the nature of the stationary points, yielding one imaginary frequency for transition states (TS) and all of them positive for *minima*. The connectivity of the transition states and their adjacent *minima* was confirmed by intrinsic reaction coordinate (IRC) calculations.<sup>5,6</sup>

1. **Gaussian 16, Revision B.01**, M. J. Frisch, G. W. Trucks, H. B. Schlegel, G. E. Scuseria, M. A. Robb, J. R. Cheeseman, G. Scalmani, V. Barone, G. A. Petersson, H. Nakatsuji, X. Li, M. Caricato, A. V. Marenich, J. Bloino, B. G. Janesko, R. Gomperts, B. Mennucci, H. P. Hratchian, J. V. Ortiz, A. F. Izmaylov, J. L. Sonnenberg, D. Williams-Young, F. Ding, F. Lipparini, F. Egidi, J. Goings, B. Peng, A. Petrone, T. Henderson, D. Ranasinghe, V. G. Zakrzewski, J. Gao, N. Rega, G. Zheng, W. Liang, M. Hada, M. Ehara, K. Toyota, R. Fukuda, J. Hasegawa, M. Ishida, T. Nakajima, Y. Honda, O. Kitao, H. Nakai, T. Vreven, K. Throssell, J. A. Montgomery, Jr., J. E. Peralta, F. Ogliaro, M. J. Bearpark, J. J. Heyd, E. N. Brothers, K. N. Kudin, V. N. Staroverov, T. A. Keith, R. Kobayashi, J. Normand, K. Raghavachari, A. P. Rendell, J. C. Burant, S. S. Iyengar, J. Tomasi, M. Cossi, J. M. Millam, M. Klene, C. Adamo, R. Cammi, J. W. Ochterski, R. L. Martin, K. Morokuma, O. Farkas, J. B. Foresman, and D. J. Fox, Gaussian, Inc., Wallingford CT, 2016.
2. a) Becke, A. D. Density-functional exchange-energy approximation with correct asymptotic behavior. *Phys. Rev. A* **1988**, 38, 3098-3100. <https://doi.org/10.1103/PhysRevA.38.3098> ; b) Becke, A. D. Density-functional thermochemistry. III. The role of exact exchange. *J. Chem. Phys.* **1993**, 98, 5648-5652. <https://doi.org/10.1063/1.464913> ; c) Lee, C.; Yang, W.; Parr, R. G. Development of the Colle-Salvetti correlation-energy formula into a functional of the electron density. *Phys. Rev. B* **1988**, 37, 785-789. <https://doi.org/10.1103/PhysRevB.37.785>
3. Grimme, S. Semiempirical GGA-type density functional constructed with a long-range dispersion correction. *J. Comp. Chem.*, **2006**, 27, 1787-1799. <https://doi.org/10.1002/jcc.20495>
4. Andrae, D.; Häussermann, U.; Dolg, M.; Stoll, H.; Preuss, H. Energy-adjusted ab initio pseudopotentials for the second and third row transition elements. *Theor. Chim. Acta.* **1990**, 77, 123–141. <https://doi.org/10.1007/BF01114537>
5. Fukui, K. The path of chemical reactions - the IRC approach. *Acc. Chem. Res.* **1981**, 14, 363–368. <https://doi.org/10.1021/ar00072a001>
6. Hratchian, H. P.; Schlegel, H. B. In *Theory and Applications of Computational Chemistry: The First 40 Years*, Eds D. C. E. Dykstra, G. Frenking, K. S. Kim, G. Scuseria. Elsevier., Amsterdam, 2005.

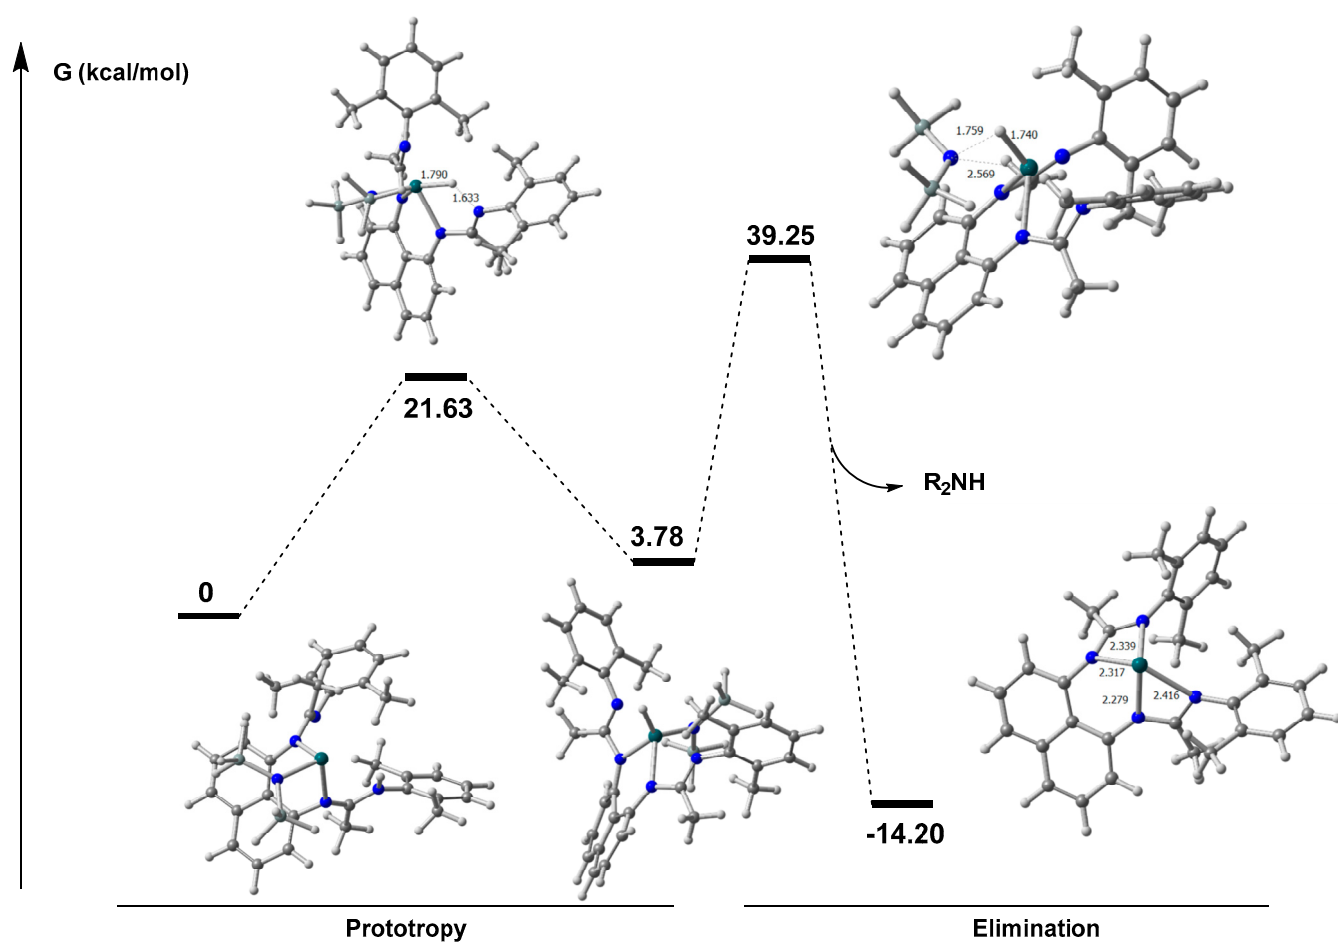

DFT calculations for the formation of  $L_1Sn$ .

## Coordinates, energies

### L1

Sum of electronic and thermal Free Energies= -2021.440506 au

|    |                 |                 |                 |
|----|-----------------|-----------------|-----------------|
| Sn | -1.331745000000 | 0.665129000000  | -1.771438000000 |
| N  | 1.342588000000  | -1.965339000000 | -0.026149000000 |
| C  | -3.098596000000 | -2.529756000000 | 2.590868000000  |
| H  | -3.776410000000 | -2.909169000000 | 3.349073000000  |
| C  | 2.395962000000  | 2.673886000000  | 0.475996000000  |
| C  | 3.336214000000  | 1.868689000000  | 1.145782000000  |
| C  | -3.027583000000 | -1.134078000000 | 2.373977000000  |
| N  | -1.036840000000 | 1.400586000000  | 0.462289000000  |
| C  | 0.342767000000  | 1.823397000000  | 2.467140000000  |
| C  | 4.611217000000  | 2.409666000000  | 1.364445000000  |
| H  | 5.348785000000  | 1.801756000000  | 1.880219000000  |
| C  | -2.319885000000 | -3.382585000000 | 1.841651000000  |
| H  | -2.367337000000 | -4.455123000000 | 2.003962000000  |
| C  | 0.720171000000  | -1.934788000000 | -2.434087000000 |
| N  | -0.738039000000 | -1.130530000000 | -0.641957000000 |
| C  | -3.846485000000 | -0.252274000000 | 3.131048000000  |
| H  | -4.533974000000 | -0.684026000000 | 3.852302000000  |
| C  | 4.949178000000  | 3.682003000000  | 0.919935000000  |
| H  | 5.946881000000  | 4.072001000000  | 1.095384000000  |
| C  | -2.122670000000 | -0.603394000000 | 1.388612000000  |
| C  | 4.233185000000  | -4.230868000000 | 0.206254000000  |
| H  | 4.465287000000  | -5.193420000000 | 0.654534000000  |
| C  | 2.721194000000  | 3.965717000000  | 0.013208000000  |
| C  | 2.938069000000  | -3.728882000000 | 0.316338000000  |
| C  | -1.401673000000 | -1.520094000000 | 0.543460000000  |
| C  | 0.495175000000  | -1.682876000000 | -0.955231000000 |
| C  | 3.048587000000  | 0.470642000000  | 1.632050000000  |
| H  | 2.893655000000  | 0.460279000000  | 2.716951000000  |
| H  | 3.899555000000  | -0.181669000000 | 1.423458000000  |
| H  | 2.174510000000  | 0.014159000000  | 1.167035000000  |
| C  | 1.859548000000  | -4.493053000000 | 1.037188000000  |
| H  | 1.136130000000  | -4.922210000000 | 0.332501000000  |
| H  | 1.289909000000  | -3.830189000000 | 1.695362000000  |
| H  | 2.280695000000  | -5.314658000000 | 1.622911000000  |
| C  | 0.094771000000  | 1.795014000000  | 0.983498000000  |
| C  | 4.007063000000  | 4.454057000000  | 0.241740000000  |
| H  | 4.266382000000  | 5.448135000000  | -0.109852000000 |
| C  | -1.504572000000 | -2.881575000000 | 0.816436000000  |
| H  | -0.964282000000 | -3.572187000000 | 0.180866000000  |
| C  | -3.785761000000 | 1.106467000000  | 2.951647000000  |
| H  | -4.432051000000 | 1.770088000000  | 3.516775000000  |
| C  | 3.626431000000  | -1.742087000000 | -0.941820000000 |
| C  | 5.228012000000  | -3.511948000000 | -0.457475000000 |
| H  | 6.236411000000  | -3.908027000000 | -0.527736000000 |
| C  | -2.854022000000 | 1.646819000000  | 2.039692000000  |
| H  | -2.766126000000 | 2.720451000000  | 1.909343000000  |
| C  | 2.622679000000  | -2.480038000000 | -0.270957000000 |
| C  | -2.021821000000 | 0.823184000000  | 1.311924000000  |
| C  | 4.918757000000  | -2.277581000000 | -1.017496000000 |
| H  | 5.690851000000  | -1.705104000000 | -1.525934000000 |
| C  | 1.696976000000  | 4.796850000000  | -0.717824000000 |
| H  | 0.756846000000  | 4.858842000000  | -0.160478000000 |
| H  | 1.455275000000  | 4.377129000000  | -1.703051000000 |

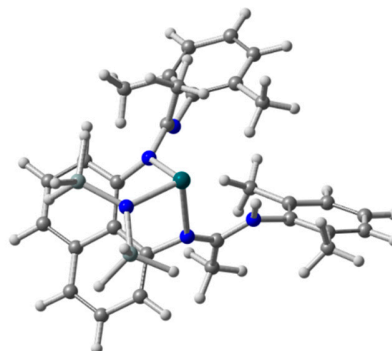

|    |                 |                 |                 |
|----|-----------------|-----------------|-----------------|
| H  | 2.067318000000  | 5.811141000000  | -0.880700000000 |
| C  | 3.358680000000  | -0.390728000000 | -1.561671000000 |
| H  | 2.475071000000  | 0.084583000000  | -1.134235000000 |
| H  | 3.197277000000  | -0.468430000000 | -2.643579000000 |
| H  | 4.207948000000  | 0.281372000000  | -1.408631000000 |
| N  | 1.090804000000  | 2.192498000000  | 0.153217000000  |
| H  | 0.834329000000  | 2.234783000000  | -0.827035000000 |
| N  | -3.415153000000 | 0.352186000000  | -1.456907000000 |
| Si | -4.104156000000 | -1.241852000000 | -1.528045000000 |
| H  | -4.410959000000 | -1.836196000000 | -0.200785000000 |
| H  | -5.388116000000 | -1.207430000000 | -2.290899000000 |
| H  | -3.173443000000 | -2.156366000000 | -2.244989000000 |
| Si | -4.433477000000 | 1.725096000000  | -1.185908000000 |
| H  | -5.303955000000 | 1.586441000000  | 0.013989000000  |
| H  | -3.562134000000 | 2.923103000000  | -0.989887000000 |
| H  | -5.337622000000 | 2.027294000000  | -2.334849000000 |
| H  | -0.493411000000 | 2.308850000000  | 2.968553000000  |
| H  | 0.396371000000  | 0.798409000000  | 2.842745000000  |
| H  | 1.266692000000  | 2.345789000000  | 2.705392000000  |
| H  | 0.813202000000  | -0.997923000000 | -2.994882000000 |
| H  | -0.138389000000 | -2.475512000000 | -2.841196000000 |
| H  | 1.629973000000  | -2.513317000000 | -2.596844000000 |

### TS1 (Prototropy from NH → SnH)

Sum of electronic and thermal Free Energies= -2021.406023 au

|    |                 |                 |                 |
|----|-----------------|-----------------|-----------------|
| Sn | 0.279203000000  | -0.193096000000 | 0.752522000000  |
| N  | 2.165799000000  | -1.074855000000 | -0.301388000000 |
| C  | 1.299949000000  | 5.034334000000  | -1.795186000000 |
| H  | 1.260993000000  | 6.088254000000  | -2.052031000000 |
| C  | -3.762050000000 | -1.526349000000 | -0.008655000000 |
| C  | -3.575846000000 | -2.633616000000 | -0.861065000000 |
| C  | 0.113422000000  | 4.409373000000  | -1.330439000000 |
| N  | -1.301745000000 | 1.108401000000  | -0.142472000000 |
| C  | -3.336414000000 | 0.798933000000  | -1.582044000000 |
| C  | -4.649364000000 | -3.497779000000 | -1.088806000000 |
| H  | -4.510628000000 | -4.348264000000 | -1.750957000000 |
| C  | 2.473010000000  | 4.331561000000  | -1.876653000000 |
| H  | 3.391138000000  | 4.817371000000  | -2.192133000000 |
| C  | 3.364074000000  | 0.090488000000  | -2.132933000000 |
| N  | 1.420588000000  | 0.949698000000  | -0.740795000000 |
| C  | -1.053530000000 | 5.201980000000  | -1.190384000000 |
| H  | -1.002527000000 | 6.250629000000  | -1.465755000000 |
| C  | -5.883569000000 | -3.284760000000 | -0.477532000000 |
| H  | -6.707830000000 | -3.967128000000 | -0.660368000000 |
| C  | 0.103968000000  | 3.007635000000  | -0.989702000000 |
| C  | 3.195440000000  | -4.425961000000 | -1.516374000000 |
| H  | 2.932095000000  | -5.136973000000 | -2.294472000000 |
| C  | -5.001522000000 | -1.308670000000 | 0.626837000000  |
| C  | 2.513054000000  | -3.207023000000 | -1.451805000000 |
| C  | 1.354299000000  | 2.292755000000  | -1.120974000000 |
| C  | 2.323982000000  | 0.003850000000  | -1.053815000000 |
| C  | -2.233105000000 | -2.874427000000 | -1.502439000000 |
| H  | -1.884795000000 | -1.998131000000 | -2.061616000000 |

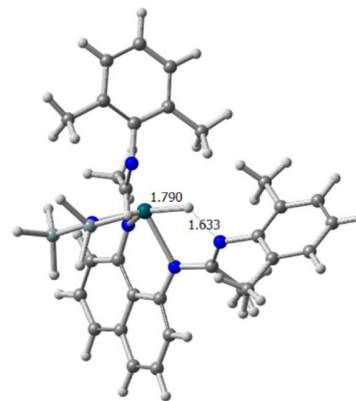

|    |                 |                 |                 |
|----|-----------------|-----------------|-----------------|
| H  | -2.272669000000 | -3.720327000000 | -2.193223000000 |
| H  | -1.468145000000 | -3.091352000000 | -0.749301000000 |
| C  | 1.413951000000  | -2.883016000000 | -2.431505000000 |
| H  | 1.722241000000  | -2.133027000000 | -3.169647000000 |
| H  | 0.537156000000  | -2.477832000000 | -1.920169000000 |
| H  | 1.107664000000  | -3.776312000000 | -2.980978000000 |
| C  | -2.440414000000 | 0.417432000000  | -0.417359000000 |
| C  | -6.050444000000 | -2.197457000000 | 0.377537000000  |
| H  | -7.007400000000 | -2.032413000000 | 0.865345000000  |
| C  | -2.205275000000 | 4.657977000000  | -0.681275000000 |
| H  | -3.090961000000 | 5.268526000000  | -0.534488000000 |
| C  | 3.853928000000  | -2.605954000000 | 0.514543000000  |
| C  | 4.189613000000  | -4.740067000000 | -0.593182000000 |
| H  | 4.706034000000  | -5.693036000000 | -0.653731000000 |
| C  | -2.233702000000 | 3.301340000000  | -0.327750000000 |
| H  | -3.130560000000 | 2.887097000000  | 0.118383000000  |
| C  | 2.865423000000  | -2.292902000000 | -0.438810000000 |
| C  | -1.142939000000 | 2.452932000000  | -0.509794000000 |
| C  | 4.509283000000  | -3.835585000000 | 0.418036000000  |
| H  | 5.275449000000  | -4.084079000000 | 1.146952000000  |
| C  | -5.173837000000 | -0.137546000000 | 1.559169000000  |
| H  | -5.166779000000 | 0.817994000000  | 1.020358000000  |
| H  | -4.354662000000 | -0.091094000000 | 2.283124000000  |
| H  | -6.121028000000 | -0.204092000000 | 2.100423000000  |
| C  | 4.185183000000  | -1.623546000000 | 1.607760000000  |
| H  | 4.903465000000  | -2.050092000000 | 2.311969000000  |
| H  | 3.289643000000  | -1.324204000000 | 2.161816000000  |
| H  | 4.613347000000  | -0.700539000000 | 1.202051000000  |
| N  | -2.685288000000 | -0.666836000000 | 0.286026000000  |
| H  | -1.215445000000 | -1.178115000000 | 0.779199000000  |
| N  | 1.025681000000  | 0.772738000000  | 2.427710000000  |
| Si | 2.279509000000  | 1.975387000000  | 2.286246000000  |
| H  | 2.843064000000  | 2.212169000000  | 3.646099000000  |
| H  | 3.381440000000  | 1.512353000000  | 1.404320000000  |
| H  | 1.793337000000  | 3.275552000000  | 1.758540000000  |
| Si | 0.232076000000  | 0.512661000000  | 3.953370000000  |
| H  | -0.418082000000 | 1.743281000000  | 4.485856000000  |
| H  | -0.822373000000 | -0.518724000000 | 3.752924000000  |
| H  | 1.172753000000  | 0.027964000000  | 5.001369000000  |
| H  | 3.583157000000  | -0.907413000000 | -2.513545000000 |
| H  | 4.296329000000  | 0.494372000000  | -1.725512000000 |
| H  | 3.034920000000  | 0.743062000000  | -2.942957000000 |
| H  | -4.311657000000 | 1.149519000000  | -1.233413000000 |
| H  | -3.520829000000 | -0.094929000000 | -2.183165000000 |
| H  | -2.889143000000 | 1.576032000000  | -2.199057000000 |
| C  | 2.500480000000  | 2.973953000000  | -1.516224000000 |
| H  | 3.451420000000  | 2.462692000000  | -1.501545000000 |

## SnH derivative

Sum of electronic and thermal Free Energies= -2021.434479 au

|    |                |                 |                 |
|----|----------------|-----------------|-----------------|
| Sn | 0.006770000000 | -0.355066000000 | -0.371221000000 |
| N  | 2.394203000000 | -0.471119000000 | -0.595504000000 |



|    |                 |                 |                 |
|----|-----------------|-----------------|-----------------|
| C  | 0.704582000000  | 5.573690000000  | -0.721809000000 |
| H  | 0.643253000000  | 6.651064000000  | -0.603780000000 |
| C  | -3.515866000000 | -1.515846000000 | -0.470199000000 |
| C  | -4.040295000000 | -1.548692000000 | -1.778071000000 |
| C  | -0.142870000000 | 4.754843000000  | 0.070380000000  |
| N  | -1.352905000000 | 1.227589000000  | 0.246820000000  |
| C  | -3.892946000000 | 1.287281000000  | 0.324097000000  |
| C  | -5.063416000000 | -2.455685000000 | -2.067913000000 |
| H  | -5.473823000000 | -2.484280000000 | -3.073601000000 |
| C  | 1.565216000000  | 5.009568000000  | -1.629953000000 |
| H  | 2.180646000000  | 5.634357000000  | -2.269932000000 |
| C  | 3.777662000000  | 1.562959000000  | -0.917666000000 |
| N  | 1.245065000000  | 1.402286000000  | -0.791822000000 |
| C  | -1.026985000000 | 5.351482000000  | 1.007662000000  |
| H  | -1.021850000000 | 6.432153000000  | 1.110286000000  |
| C  | -5.550791000000 | -3.321317000000 | -1.091078000000 |
| H  | -6.341527000000 | -4.025001000000 | -1.332431000000 |
| C  | -0.105321000000 | 3.326333000000  | -0.076426000000 |
| C  | 4.834991000000  | -3.195629000000 | -1.101811000000 |
| H  | 5.091453000000  | -3.926775000000 | -1.863395000000 |
| C  | -3.992634000000 | -2.391142000000 | 0.523923000000  |
| C  | 3.807077000000  | -2.285913000000 | -1.353487000000 |
| C  | 0.945759000000  | 2.766009000000  | -0.890969000000 |
| C  | 2.474305000000  | 0.827238000000  | -0.778477000000 |
| C  | -3.498553000000 | -0.621833000000 | -2.837216000000 |
| H  | -3.708403000000 | 0.429789000000  | -2.608976000000 |
| H  | -3.939854000000 | -0.844037000000 | -3.811881000000 |
| H  | -2.411342000000 | -0.713285000000 | -2.922556000000 |
| C  | 3.038298000000  | -2.311369000000 | -2.648575000000 |
| H  | 3.078047000000  | -1.343406000000 | -3.159602000000 |
| H  | 1.979063000000  | -2.526229000000 | -2.472745000000 |
| H  | 3.434335000000  | -3.073180000000 | -3.324586000000 |
| C  | -2.563196000000 | 0.606772000000  | 0.150573000000  |
| C  | -5.013023000000 | -3.287213000000 | 0.193715000000  |
| H  | -5.385019000000 | -3.965540000000 | 0.956645000000  |
| C  | -1.850071000000 | 4.571124000000  | 1.780940000000  |
| H  | -2.491070000000 | 5.020370000000  | 2.533208000000  |
| C  | 4.158143000000  | -1.319479000000 | 0.874107000000  |
| C  | 5.525194000000  | -3.178409000000 | 0.109606000000  |
| H  | 6.319035000000  | -3.895488000000 | 0.294489000000  |
| C  | -1.898031000000 | 3.179677000000  | 1.575691000000  |
| H  | -2.572479000000 | 2.575095000000  | 2.167771000000  |
| C  | 3.482966000000  | -1.336565000000 | -0.364141000000 |
| C  | -1.119816000000 | 2.560402000000  | 0.604274000000  |
| C  | 5.182436000000  | -2.248775000000 | 1.086780000000  |
| H  | 5.703826000000  | -2.245471000000 | 2.039916000000  |
| C  | -3.407607000000 | -2.347619000000 | 1.910879000000  |
| H  | -3.668061000000 | -1.416862000000 | 2.427776000000  |
| H  | -2.316006000000 | -2.386027000000 | 1.877201000000  |
| H  | -3.772006000000 | -3.181108000000 | 2.516407000000  |
| C  | 3.768364000000  | -0.344877000000 | 1.956605000000  |
| H  | 4.152684000000  | -0.672361000000 | 2.925466000000  |
| H  | 2.682108000000  | -0.258546000000 | 2.024371000000  |
| H  | 4.161275000000  | 0.662001000000  | 1.771931000000  |
| N  | -2.439463000000 | -0.652344000000 | -0.177416000000 |
| H  | -0.170068000000 | -1.189565000000 | -1.835965000000 |
| N  | 0.242128000000  | -1.221606000000 | 1.492141000000  |
| Si | -0.173104000000 | -0.276804000000 | 2.888139000000  |
| H  | 0.250599000000  | -1.040511000000 | 4.095876000000  |

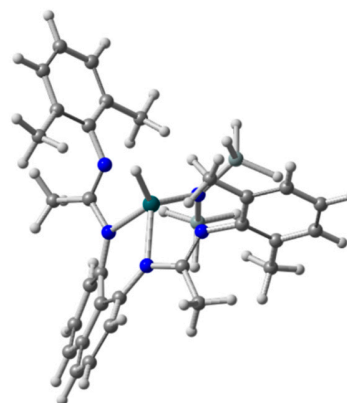

|    |                 |                 |                 |
|----|-----------------|-----------------|-----------------|
| H  | 0.529329000000  | 1.033822000000  | 2.885078000000  |
| H  | -1.626314000000 | 0.008029000000  | 3.025234000000  |
| Si | 0.823333000000  | -2.854311000000 | 1.603919000000  |
| H  | -0.186475000000 | -3.766785000000 | 2.214205000000  |
| H  | 1.096498000000  | -3.337366000000 | 0.224413000000  |
| H  | 2.062864000000  | -2.972427000000 | 2.414801000000  |
| H  | 4.585241000000  | 0.960050000000  | -0.503530000000 |
| H  | 3.733384000000  | 2.532915000000  | -0.418993000000 |
| H  | 4.003900000000  | 1.740965000000  | -1.972927000000 |
| H  | -4.220464000000 | 1.225748000000  | 1.366307000000  |
| H  | -4.639147000000 | 0.774407000000  | -0.284664000000 |
| H  | -3.838479000000 | 2.341485000000  | 0.050340000000  |
| C  | 1.688558000000  | 3.609440000000  | -1.709056000000 |
| H  | 2.397165000000  | 3.178545000000  | -2.403734000000 |

### Amine elimination

Sum of electronic and thermal Free Energies= -2021.377957 au

|    |                 |                 |                 |
|----|-----------------|-----------------|-----------------|
| Sn | -0.015271000000 | 0.027585000000  | 0.923622000000  |
| N  | -1.014386000000 | -1.889642000000 | 0.061604000000  |
| C  | 5.090374000000  | -1.390345000000 | -1.602219000000 |
| H  | 6.111352000000  | -1.349545000000 | -1.968873000000 |
| C  | -2.296066000000 | 2.497909000000  | -0.227936000000 |
| C  | -3.528207000000 | 2.091286000000  | -0.773984000000 |
| C  | 4.320354000000  | -0.198096000000 | -1.622063000000 |
| N  | 0.935411000000  | 1.136177000000  | -0.706496000000 |
| C  | -4.633805000000 | 2.936189000000  | -0.643036000000 |
| H  | -5.584896000000 | 2.628597000000  | -1.068380000000 |
| C  | 4.565834000000  | -2.559232000000 | -1.113070000000 |
| H  | 5.165455000000  | -3.463156000000 | -1.076527000000 |
| N  | 1.139115000000  | -1.506609000000 | -0.146031000000 |
| C  | 4.911818000000  | 0.994699000000  | -2.112459000000 |
| H  | 5.939741000000  | 0.957166000000  | -2.459176000000 |
| C  | -4.528099000000 | 4.155548000000  | 0.021134000000  |
| H  | -5.395481000000 | 4.801552000000  | 0.115816000000  |
| C  | 2.960861000000  | -0.200595000000 | -1.151145000000 |
| C  | -4.160778000000 | -3.203588000000 | -1.409624000000 |
| H  | -4.643762000000 | -3.290906000000 | -2.378996000000 |
| C  | -2.180825000000 | 3.719514000000  | 0.470017000000  |
| C  | -2.887758000000 | -2.626525000000 | -1.338479000000 |
| C  | 2.441193000000  | -1.454269000000 | -0.656761000000 |
| C  | 0.145998000000  | -2.350497000000 | -0.408887000000 |
| C  | -3.639974000000 | 0.769887000000  | -1.481370000000 |
| H  | -2.959698000000 | 0.715207000000  | -2.336969000000 |
| H  | -4.657246000000 | 0.600589000000  | -1.842609000000 |
| H  | -3.375234000000 | -0.059324000000 | -0.819645000000 |
| C  | -2.220146000000 | -2.119967000000 | -2.593591000000 |
| H  | -1.609065000000 | -2.890859000000 | -3.077137000000 |
| H  | -1.564456000000 | -1.273100000000 | -2.380638000000 |
| H  | -2.969850000000 | -1.800922000000 | -3.321994000000 |
| C  | -0.101110000000 | 1.896268000000  | -1.064366000000 |
| C  | -3.308725000000 | 4.537911000000  | 0.575794000000  |
| H  | -3.227255000000 | 5.479910000000  | 1.110716000000  |
| C  | 3.246477000000  | -2.581770000000 | -0.627436000000 |

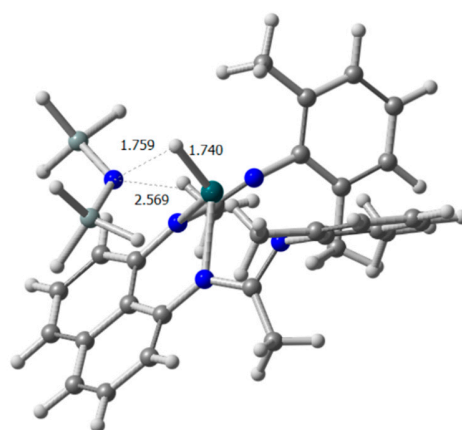

|    |                 |                 |                 |
|----|-----------------|-----------------|-----------------|
| H  | 2.856659000000  | -3.486567000000 | -0.178739000000 |
| C  | 4.207331000000  | 2.171013000000  | -2.122761000000 |
| H  | 4.669390000000  | 3.090405000000  | -2.468100000000 |
| C  | -2.931811000000 | -2.944832000000 | 1.096359000000  |
| C  | -4.815403000000 | -3.646232000000 | -0.264777000000 |
| H  | -5.804738000000 | -4.086764000000 | -0.339171000000 |
| C  | 2.882223000000  | 2.198022000000  | -1.655625000000 |
| H  | 2.364261000000  | 3.145814000000  | -1.596482000000 |
| C  | -2.270069000000 | -2.514520000000 | -0.073367000000 |
| C  | 2.238283000000  | 1.052440000000  | -1.206330000000 |
| C  | -4.202059000000 | -3.510755000000 | 0.980046000000  |
| H  | -4.712958000000 | -3.849323000000 | 1.876843000000  |
| C  | -0.880801000000 | 4.120057000000  | 1.119635000000  |
| H  | -0.492068000000 | 3.325002000000  | 1.762655000000  |
| H  | -1.013880000000 | 5.015938000000  | 1.730312000000  |
| H  | -0.092058000000 | 4.335093000000  | 0.390418000000  |
| C  | -2.270960000000 | -2.787382000000 | 2.441124000000  |
| H  | -2.176732000000 | -1.731375000000 | 2.720012000000  |
| H  | -1.256746000000 | -3.198525000000 | 2.445027000000  |
| H  | -2.850590000000 | -3.286317000000 | 3.221395000000  |
| N  | -1.175384000000 | 1.638373000000  | -0.317753000000 |
| H  | 0.354394000000  | 0.416615000000  | 2.578398000000  |
| N  | 2.096925000000  | 0.367399000000  | 2.345447000000  |
| Si | 2.925147000000  | 1.860822000000  | 2.242793000000  |
| H  | 2.000090000000  | 2.882337000000  | 1.657557000000  |
| H  | 3.372848000000  | 2.413396000000  | 3.560426000000  |
| H  | 4.134194000000  | 1.845844000000  | 1.364677000000  |
| Si | 2.605448000000  | -1.109567000000 | 3.036842000000  |
| H  | 3.000114000000  | -1.031817000000 | 4.477826000000  |
| H  | 1.439087000000  | -2.057297000000 | 2.971166000000  |
| H  | 3.729352000000  | -1.794710000000 | 2.332061000000  |
| C  | 0.307075000000  | -3.670636000000 | -1.102976000000 |
| H  | -0.655407000000 | -4.073803000000 | -1.411349000000 |
| H  | 0.971996000000  | -3.568317000000 | -1.963952000000 |
| H  | 0.768671000000  | -4.383695000000 | -0.413671000000 |
| C  | -0.124662000000 | 2.873098000000  | -2.203715000000 |
| H  | 0.201448000000  | 3.863870000000  | -1.872963000000 |
| H  | 0.549802000000  | 2.546326000000  | -2.997412000000 |
| H  | -1.142625000000 | 2.968339000000  | -2.584678000000 |

## L1Sn

Sum of electronic and thermal Free Energies= -1383.498096 au

|    |                 |                 |                 |
|----|-----------------|-----------------|-----------------|
| Sn | -0.073500000000 | 0.048241000000  | -1.607961000000 |
| N  | 0.305976000000  | -1.891444000000 | -0.357900000000 |
| C  | -5.752003000000 | -0.343197000000 | 0.362869000000  |
| H  | -6.774774000000 | -0.100632000000 | 0.635195000000  |
| N  | 1.150883000000  | 1.381768000000  | -0.008333000000 |
| C  | 2.350574000000  | 2.126564000000  | 0.062408000000  |
| C  | 2.408389000000  | 3.414621000000  | -0.518380000000 |
| C  | -4.753632000000 | 0.650330000000  | 0.544536000000  |
| N  | -1.063143000000 | 1.224820000000  | 0.073674000000  |

|   |                 |                 |                 |
|---|-----------------|-----------------|-----------------|
| C | 0.076486000000  | 2.637833000000  | 1.839911000000  |
| H | 1.030864000000  | 2.493445000000  | 2.348991000000  |
| H | -0.748045000000 | 2.385605000000  | 2.509355000000  |
| H | -0.007114000000 | 3.699698000000  | 1.590735000000  |
| C | 3.611867000000  | 4.123447000000  | -0.472613000000 |
| H | 3.656838000000  | 5.113636000000  | -0.917992000000 |
| C | -5.436551000000 | -1.573351000000 | -0.157378000000 |
| H | -6.206993000000 | -2.323493000000 | -0.307818000000 |
| C | -1.492382000000 | -3.296251000000 | 0.682735000000  |
| H | -2.225014000000 | -2.954481000000 | 1.418377000000  |
| H | -0.677742000000 | -3.819265000000 | 1.180854000000  |
| H | -2.003497000000 | -4.001511000000 | 0.021719000000  |
| N | -1.776297000000 | -1.237228000000 | -0.705584000000 |
| C | -5.123577000000 | 1.918636000000  | 1.061718000000  |
| H | -6.165060000000 | 2.094616000000  | 1.312615000000  |
| C | 4.748186000000  | 3.572888000000  | 0.114956000000  |
| H | 5.676883000000  | 4.134746000000  | 0.139752000000  |
| C | -3.383645000000 | 0.372308000000  | 0.203206000000  |
| C | 3.332037000000  | -4.005586000000 | -0.141848000000 |
| H | 3.994507000000  | -4.550455000000 | -0.808679000000 |
| C | 3.503917000000  | 1.550674000000  | 0.631598000000  |
| C | 2.235075000000  | -3.328686000000 | -0.679009000000 |
| C | -3.089748000000 | -0.935132000000 | -0.331438000000 |
| C | -0.985702000000 | -2.130515000000 | -0.124626000000 |
| C | 1.211345000000  | 4.004611000000  | -1.223005000000 |
| H | 0.777112000000  | 3.290104000000  | -1.929506000000 |
| H | 1.496760000000  | 4.901381000000  | -1.778246000000 |
| H | 0.409088000000  | 4.290746000000  | -0.533622000000 |
| C | 1.965612000000  | -3.338880000000 | -2.161363000000 |
| H | 2.080443000000  | -2.339529000000 | -2.597239000000 |
| H | 0.941187000000  | -3.656882000000 | -2.379479000000 |
| H | 2.654908000000  | -4.010081000000 | -2.679669000000 |
| C | 0.036053000000  | 1.769202000000  | 0.608338000000  |
| C | 4.689680000000  | 2.290236000000  | 0.653484000000  |
| H | 5.575500000000  | 1.847553000000  | 1.100639000000  |
| C | -4.106095000000 | -1.859979000000 | -0.515111000000 |
| H | -3.856985000000 | -2.815010000000 | -0.963856000000 |
| C | -4.182814000000 | 2.905311000000  | 1.213705000000  |
| H | -4.466927000000 | 3.887783000000  | 1.578589000000  |
| C | 1.631340000000  | -2.582851000000 | 1.578057000000  |
| C | 3.580555000000  | -3.992260000000 | 1.229467000000  |
| H | 4.437080000000  | -4.523002000000 | 1.633478000000  |
| C | -2.839870000000 | 2.659682000000  | 0.877856000000  |
| H | -2.129702000000 | 3.472718000000  | 0.944623000000  |
| C | 1.374300000000  | -2.627237000000 | 0.189756000000  |
| C | -2.403554000000 | 1.419679000000  | 0.418370000000  |
| C | 2.734280000000  | -3.282854000000 | 2.077121000000  |
| H | 2.939157000000  | -3.249018000000 | 3.143698000000  |
| C | 3.450746000000  | 0.163986000000  | 1.207305000000  |
| H | 3.118086000000  | -0.566336000000 | 0.465550000000  |
| H | 2.739696000000  | 0.103322000000  | 2.035674000000  |
| H | 4.430345000000  | -0.149322000000 | 1.576229000000  |
| C | 0.775662000000  | -1.752151000000 | 2.502015000000  |
| H | -0.137703000000 | -2.272846000000 | 2.810340000000  |
| H | 0.467785000000  | -0.823808000000 | 2.014464000000  |
| H | 1.327202000000  | -1.503603000000 | 3.412429000000  |

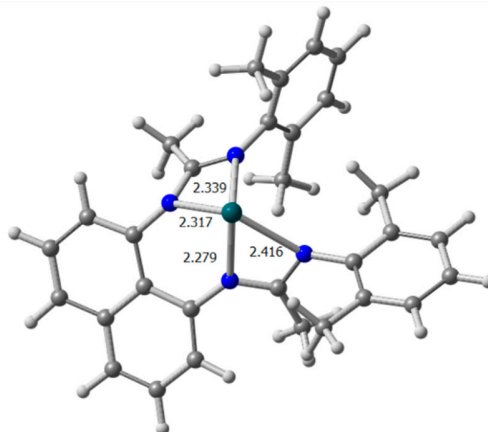

### Dimethylamine

Sum of electronic and thermal Free Energies= -637.965039 au

|    |                 |                 |                 |
|----|-----------------|-----------------|-----------------|
| N  | 0.000013000000  | 0.619231000000  | 0.013062000000  |
| Si | -1.568800000000 | -0.134296000000 | -0.001379000000 |
| Si | 1.568801000000  | -0.134298000000 | -0.001374000000 |
| H  | -0.000056000000 | 1.627612000000  | -0.100148000000 |
| H  | 2.501052000000  | 0.609543000000  | 0.888029000000  |
| H  | 2.199845000000  | -0.185867000000 | -1.350864000000 |
| H  | 1.398947000000  | -1.524682000000 | 0.486474000000  |
| H  | -1.399201000000 | -1.524548000000 | 0.486909000000  |
| H  | -2.501148000000 | 0.609826000000  | 0.887694000000  |
| H  | -2.199551000000 | -0.186184000000 | -1.350986000000 |

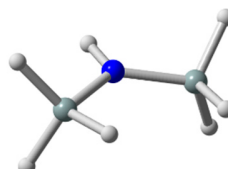

### SnCl<sub>2</sub>

Sum of electronic and thermal Free Energies= -923.922288 au

|    |                |                 |                 |
|----|----------------|-----------------|-----------------|
| Sn | 0.000000000000 | 0.000000000000  | 0.639572000000  |
| Cl | 0.000000000000 | 1.823507000000  | -0.940547000000 |
| Cl | 0.000000000000 | -1.823507000000 | -0.940547000000 |

### GeCl<sub>2</sub>

Sum of electronic and thermal Free Energies= -2995.495709 au

|    |                |                 |                 |
|----|----------------|-----------------|-----------------|
| Cl | 0.000000000000 | -1.702742000000 | -0.688640000000 |
| Cl | 0.000000000000 | 1.702742000000  | -0.688640000000 |
| Ge | 0.000000000000 | 0.000000000000  | 0.731680000000  |
